# Supplementary material for: Comparative Analysis of Coumarin Profiles in Different Parts of Peucedanum japonicum and Their Aldo–Keto Reductase Inhibitory Activities
Source: MDPI journal article supplement (doi:10.3390/molecules27217391), 2022-10-31
Supplement: s1 [file s1]

# Supporting Information

## Comparative analysis of coumarin profiles in different parts of *Peucedanum japonicum* and their aldo-keto reductase inhibitory activities

Jisu Park <sup>1,2</sup>, Sunil Babu Paudel <sup>3</sup>, Chang Hyun Jin <sup>1</sup>, Gileung Lee <sup>1</sup>, Hong-Il Choi <sup>1</sup>, Ga-Hee Ryoo <sup>1</sup>, Yun-Seo Kil <sup>3</sup>, Joo-Won Nam <sup>3</sup>, Chan-Hun Jung <sup>4</sup>, Bo-Ram Kim <sup>5</sup>, MinKyun Na <sup>2</sup>, Ah-Reum Han <sup>1,\*</sup>

- 1 Advanced Radiation Technology Institute, Korea Atomic Energy Research Institute, Jeongeup-si, Jeollabuk-do 56212, Republic of Korea; parkjs94@kaeri.re.kr (J.P.); chjin@kaeri.re.kr (C.H.J.); glee@kaeri.re.kr (G.L.); hichoi@kaeri.re.kr (H.-I.C.); ghryoo@kaeri.re.kr (G.H.R.)
  - 2 College of Pharmacy, Chungnam National University, Daejeon 34134, Republic of Korea; mkna@cnu.ac.kr (M.N)
  - 3 College of Pharmacy, Yeungnam University, Gyeongsan-si, Gyeongsangbukdo 38541, Republic of Korea; phrsunil@gmail.com (S.B.P.); yskil@yu.ac.kr (Y.-S.K.); jwnam@yu.ac.kr (J.-W.N.)
  - 4 Jeonju AgroBio-Materials Institute, Jeonju-si, Jeollabuk-do 54810, Republic of Korea; chjung@jami.re.kr (C.-H.J.)
  - 5 Natural Product Research Division, Honam National Institute of Biological Resources, Mokpo-si, Jeollanam-do 58762, Republic of Korea; boram0307@hnibr.re.kr (B.-R.K.)
- \* Correspondence: arhan@kaeri.re.kr (A.-R.H.), Tel.: +82-63-570-3167 (A.-R.H.)

# CONTENTS

|                    |                                                                                                                                                                                                                                                 |
|--------------------|-------------------------------------------------------------------------------------------------------------------------------------------------------------------------------------------------------------------------------------------------|
| <b>Figure S1.</b>  | LC–MS base peak ion chromatograms of the flowers of <i>P. japonicum</i> at positive ion mode (6 eV, ESI+)                                                                                                                                       |
| <b>Figure S2.</b>  | ESI-QToF-MS spectrum of oxypeucedanin hydrate (peak 1)                                                                                                                                                                                          |
| <b>Figure S3.</b>  | ESI-QToF-MS spectrum of oxypeucedanin methanolate (peak 2)                                                                                                                                                                                      |
| <b>Figure S4.</b>  | ESI-QToF-MS spectrum of pabulenol (peak 3)                                                                                                                                                                                                      |
| <b>Figure S5.</b>  | ESI-QToF-MS spectrum of 5-[(3-hydroxy-3-methyl-1-butenyl)oxy]psoralen (peak 4)                                                                                                                                                                  |
| <b>Figure S6.</b>  | ESI-QToF-MS spectrum of 3'-O-acetyl-4'-O-propanoylkhellactone (peak 5)                                                                                                                                                                          |
| <b>Figure S7.</b>  | ESI-QToF-MS spectrum of 3'-O-(2-methyl-butyryl)-4'-hydroxy khellactone (or 3'-O-(isovaleryl)-4'-hydroxy khellactone) (peak 6)                                                                                                                   |
| <b>Figure S8.</b>  | ESI-QToF-MS spectrum of 3'-O-acetyl-4'-O-isobutyryl khellactone (hyuganin D) (peak 7)                                                                                                                                                           |
| <b>Figure S9.</b>  | ESI-QToF-MS spectrum of isoimperatorin (peak 8)                                                                                                                                                                                                 |
| <b>Figure S10.</b> | ESI-QToF-MS spectrum of 3'-O-acetyl-4'-O-angeloylkhellactone (pteryxin) (peak 9)                                                                                                                                                                |
| <b>Figure S11.</b> | ESI-QToF-MS spectrum of 3'-O-acetyl-4'-O-senecioidkhellactone (peak 10)                                                                                                                                                                         |
| <b>Figure S12.</b> | ESI-QToF-MS spectrum of 3'-O-acetyl-4'-O-(2-methyl butanoate)khellactone (or 3'-O-acetyl-4'-O-isovalerylkhellactone) (peak 11)                                                                                                                  |
| <b>Figure S13.</b> | ESI-QToF-MS spectrum of 3'-O-propanoyl-4'-O-angeloyl khellactone (or 3'-O-propanoyl-4'-O-senecioidkhellactone) (peak 12)                                                                                                                        |
| <b>Figure S14.</b> | ESI-QToF-MS spectrum of 3'-O-angeloyl-4'-O-propanoylkhellactone (or 3'-O-senecioid-4'-O-propanoylkhellactone) (peak 13)                                                                                                                         |
| <b>Figure S15.</b> | ESI-QToF-MS spectrum of 3'-O-isobutyryl-4'-O-isobutyrylkhellactone (peak 14)                                                                                                                                                                    |
| <b>Figure S16.</b> | ESI-QToF-MS spectrum of 3'-O-angeloyl-4'-O-isobutyrylkhellactone (peak 15)                                                                                                                                                                      |
| <b>Figure S17.</b> | ESI-QToF-MS spectrum of 3'-O-isobutyryl-4'-O-angeloylkhellactone (peak 16)                                                                                                                                                                      |
| <b>Figure S18.</b> | ESI-QToF-MS spectrum of 3'-O-isobutyryl-4'-O-senecioidkhellactone (peak 17)                                                                                                                                                                     |
| <b>Figure S19.</b> | ESI-QToF-MS spectrum of 3'-O-senecioid-4'-O-isobutyrylkhellactone (peak 18)                                                                                                                                                                     |
| <b>Figure S20.</b> | ESI-QToF-MS spectrum of 3'-O-angeloyl-4'-O-angeloylkhellactone (paeruptorin B) (peak 19)                                                                                                                                                        |
| <b>Figure S21.</b> | ESI-QToF-MS spectrum of 3'-O-angeloyl-4'-O-senecioidkhellactone (peak 20)                                                                                                                                                                       |
| <b>Figure S22.</b> | ESI-QToF-MS spectrum of 3'-O-senecioid-4'-O-senecioidkhellactone (peak 21)                                                                                                                                                                      |
| <b>Figure S23.</b> | ESI-QToF-MS spectrum of 3'-O-senecioid-4'-O-angeloylkhellactone (peak 22)                                                                                                                                                                       |
| <b>Figure S24.</b> | ESI-QToF-MS spectrum of 3'-O-(2-methyl butyryl)-4'-O-isobutyrylkhellactone (peak 23)                                                                                                                                                            |
| <b>Figure S25.</b> | ESI-QToF-MS spectrum of 3'-O-isovaleryl-4'-O-isobutyrylkhellactone (peak 24)                                                                                                                                                                    |
| <b>Figure S26.</b> | ESI-QToF-MS spectrum of 3'-O-(2-methyl butyryl)-4'-O-angeloylkhellactone [3'-O-(2-methyl butyryl)-4'-O-senecioid khellactone, 3'-O-isovaleryl-4'-O-angeloylkhellactone (paeruptorin C), or 3'-O-isovaleryl-4'-O-senecioidkhellactone] (peak 25) |
| <b>Figure S27.</b> | ESI-QToF-MS spectrum of 3'-O-angeloyl-4'-O-(2-methyl butyryl)khellactone [3'-O-angeloyl-4'-O-isovaleryl khellactone, 3'-O-senecioid-4'-O-(2-methyl butyryl)khellactone, or 3'-O-senecioid-4'-O-isovaleryl khellactone] (peak 26)                |
| <b>Figure S28.</b> | ESI-QToF-MS spectrum of 3'-O-(2-methyl butyryl)-4'-O-(2-methyl butyryl)khellactone (or 3'-O-(2-methyl butyryl)-4'-O-isovalerylkhellactone) (peak 27)                                                                                            |
| <b>Figure S29.</b> | ESI-QToF-MS spectrum of 3'-O-isovaleryl-4'-O-(2-methyl butyryl)khellactone (or 3'-O-isovaleryl-4'-O-isovalerylkhellactone) (peak 28)                                                                                                            |

- Figure S30.** Total scan PDA chromatograms of (a) flowers (S3), (b) roots (S15), (c) leaves (S9), and (d) stems (S21) of *Peucedanum japonicum*
- Figure S31.** UV-Vis spectra of all the peaks present in PDA chromatograms of the methanol extract of four parts of *Peucedanum japonicum* between 200–500 nm
- Figure S32.** Permutation plot for validation of OPLS-DA obtained from 200 permutation test.

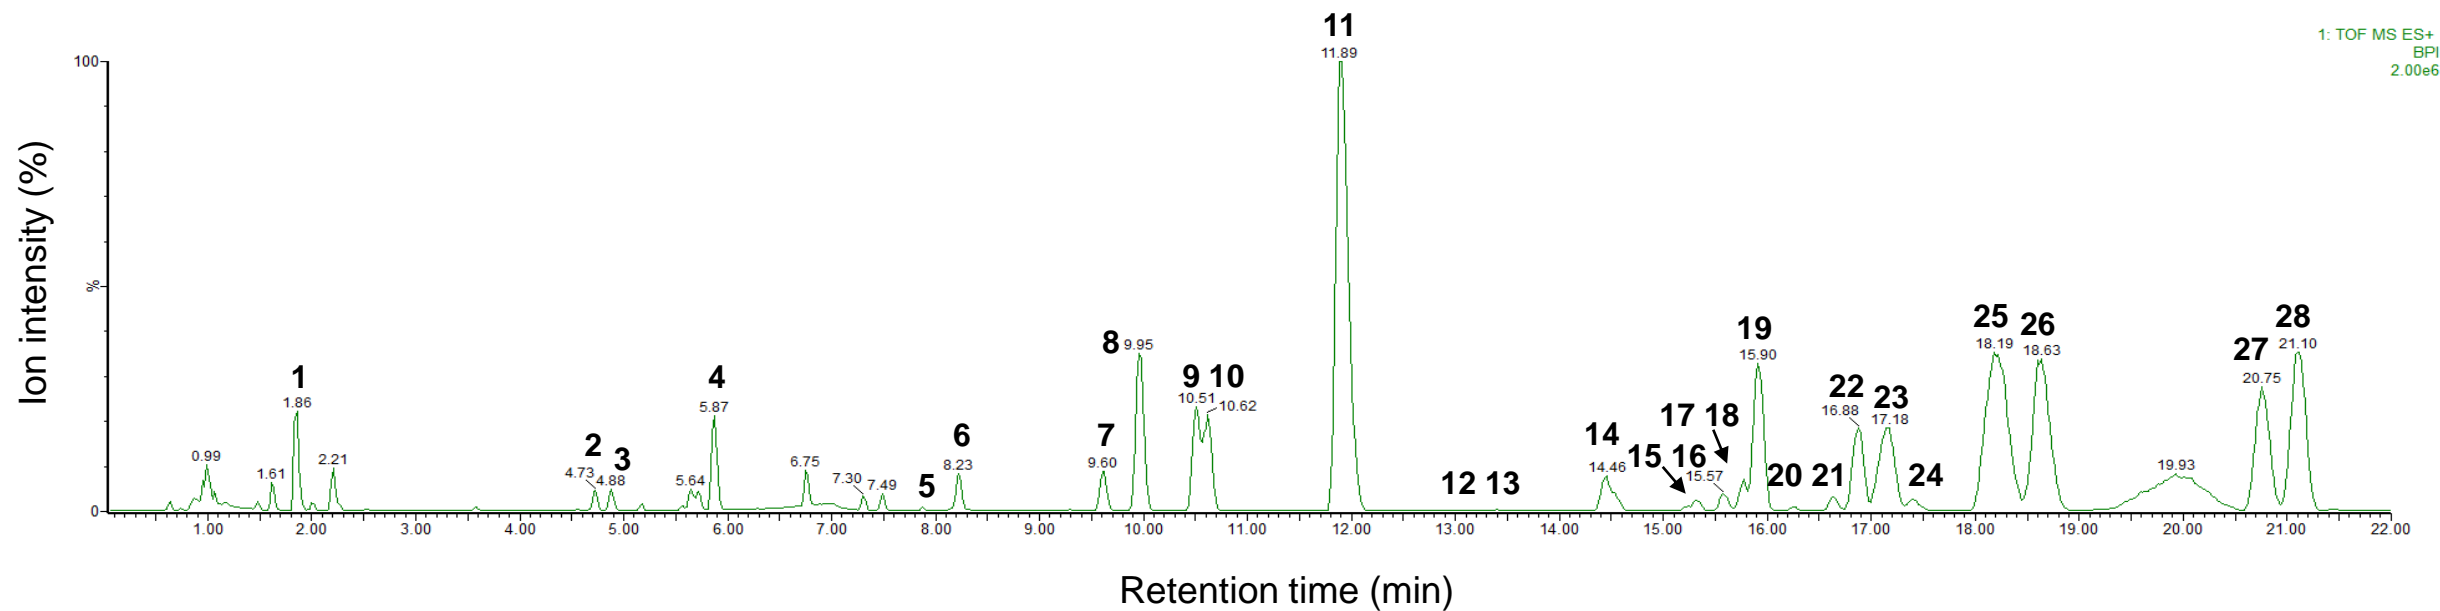

**Figure S1.** LC–MS base peak ion chromatograms of the dichloromethane fraction of the flowers of *P. japonicum* at positive ion mode (6 eV, ESI<sup>+</sup>).

220530\_peu\_flower\_p\_03 99 (1.831) AM2 (Ar,20000.0,0.00,0.00); ABS

1: TOF MS ES+  
1.50e6

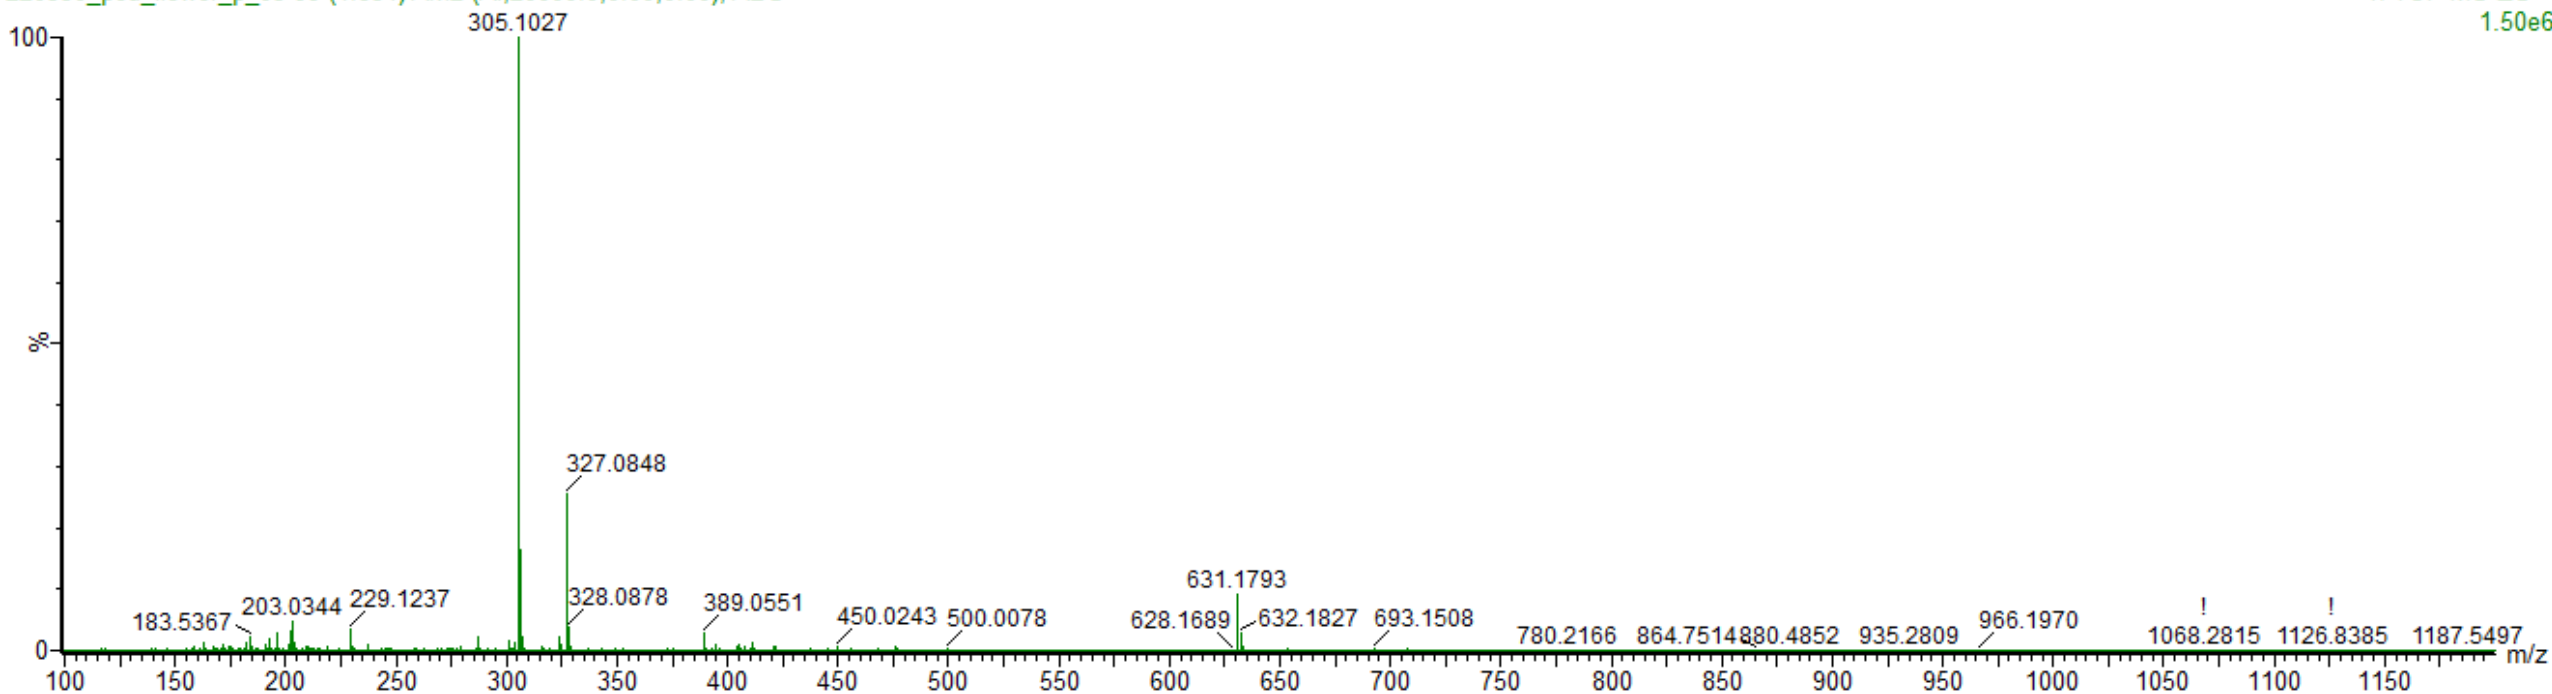

**Figure S2.** ESI-QToF-MS spectrum of oxypeucedanin hydrate (peak 1).

220321\_peuce\_CH2Cl2\_2 255 (4.712) AM2 (Ar,20000.0,0.00,0.00); ABS

1: TOF MS ES+  
1.83e5

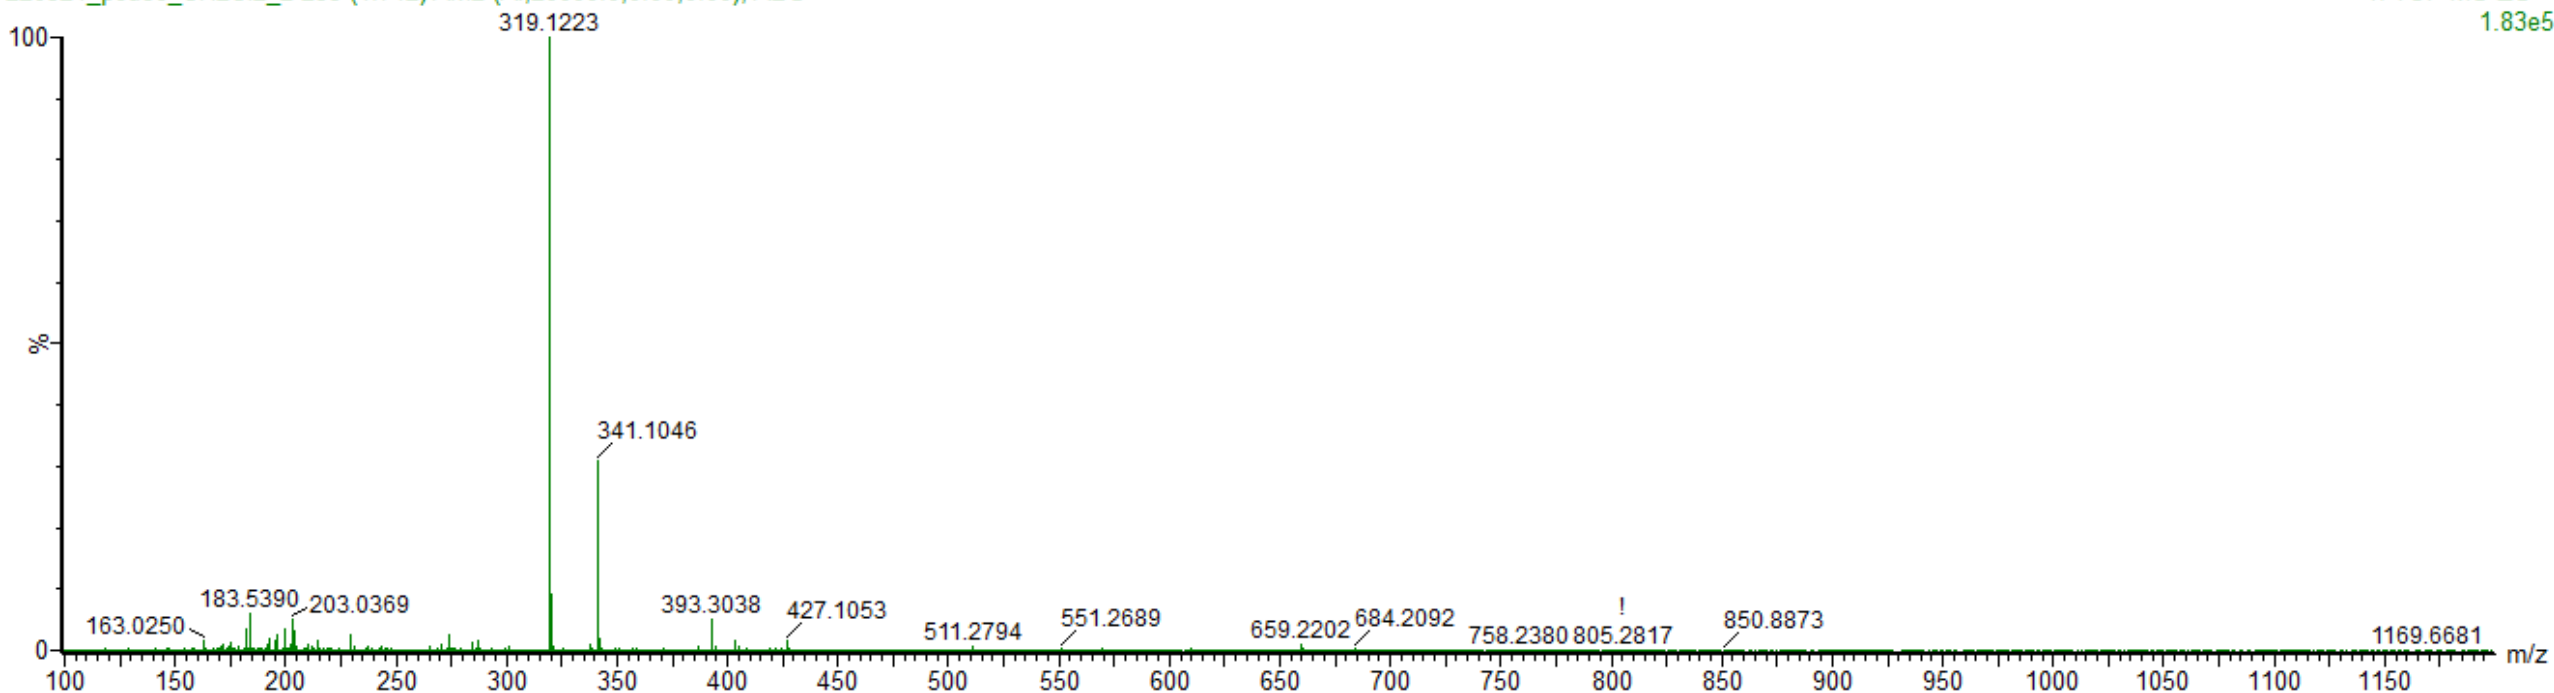

**Figure S3.** ESI-QToF-MS spectrum of oxypeucedanin methanolate (peak 2).

220530\_peu\_flower\_p\_03 265 (4.895) AM2 (Ar,20000.0,0.00,0.00); ABS

1: TOF MS ES+  
3.24e5

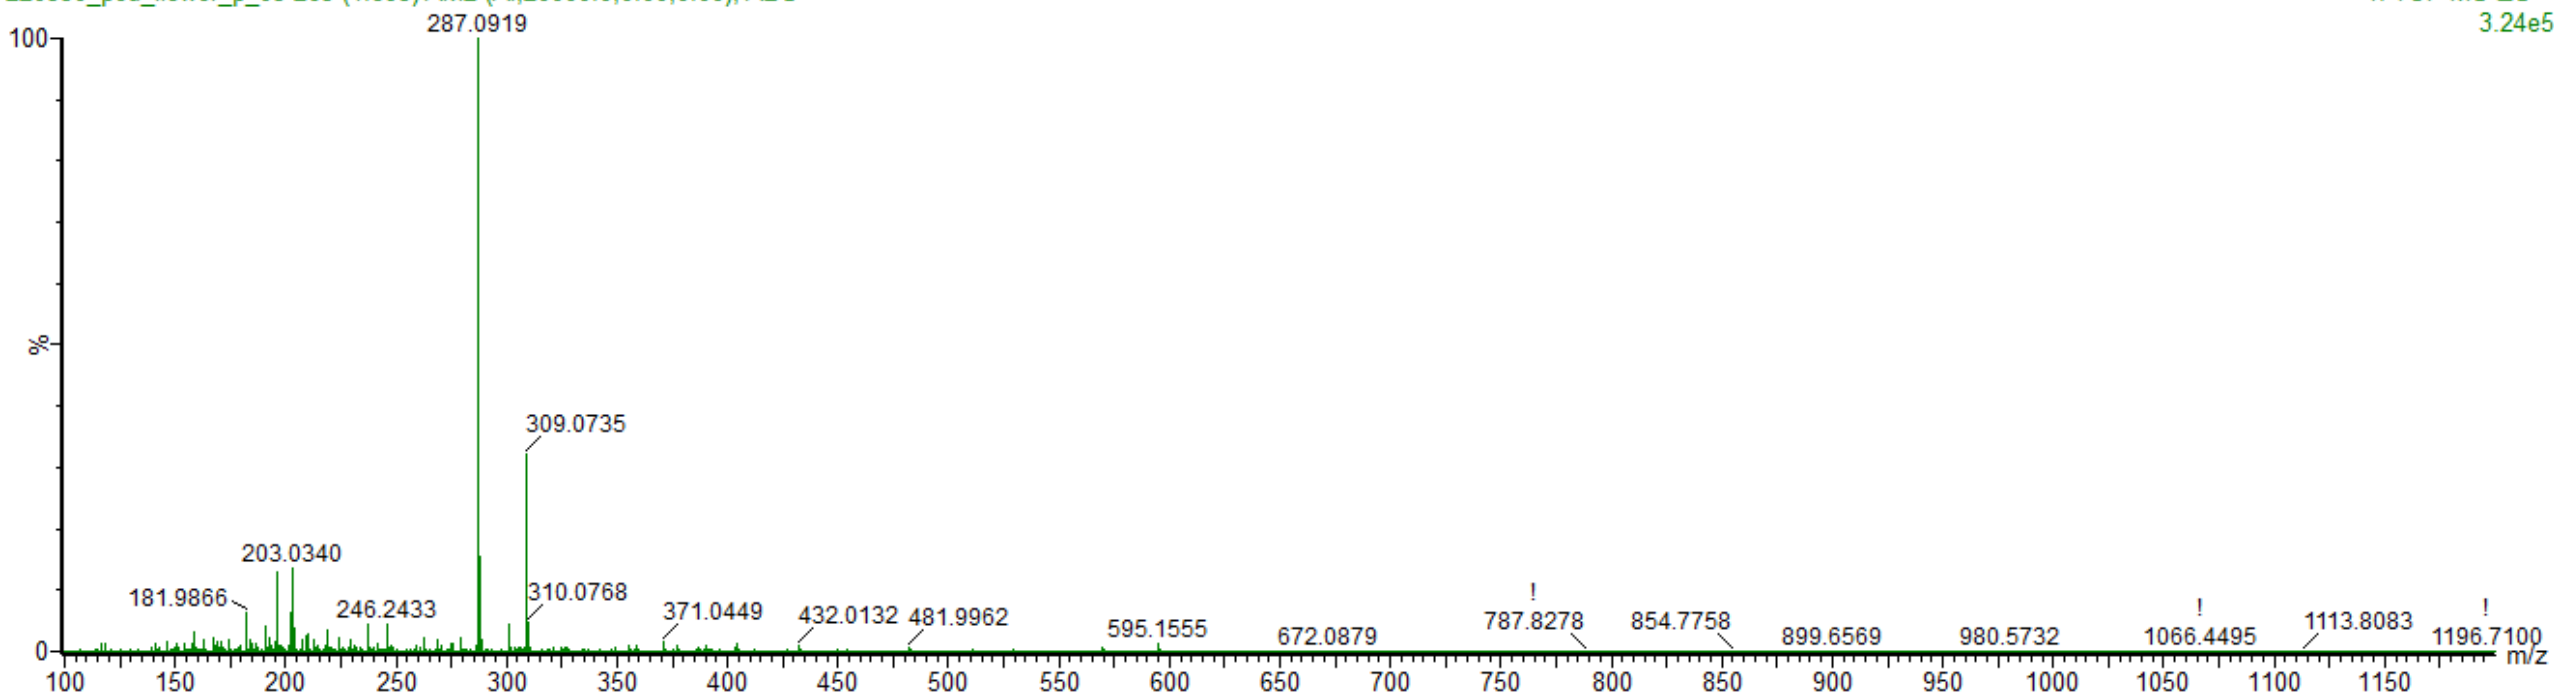

**Figure S4.** ESI-QToF-MS spectrum of pabulenol (peak 3).

220530\_peu\_flower\_p\_03 319 (5.889) AM2 (Ar,20000.0,0.00,0.00); ABS

1: TOF MS ES+  
1.40e6

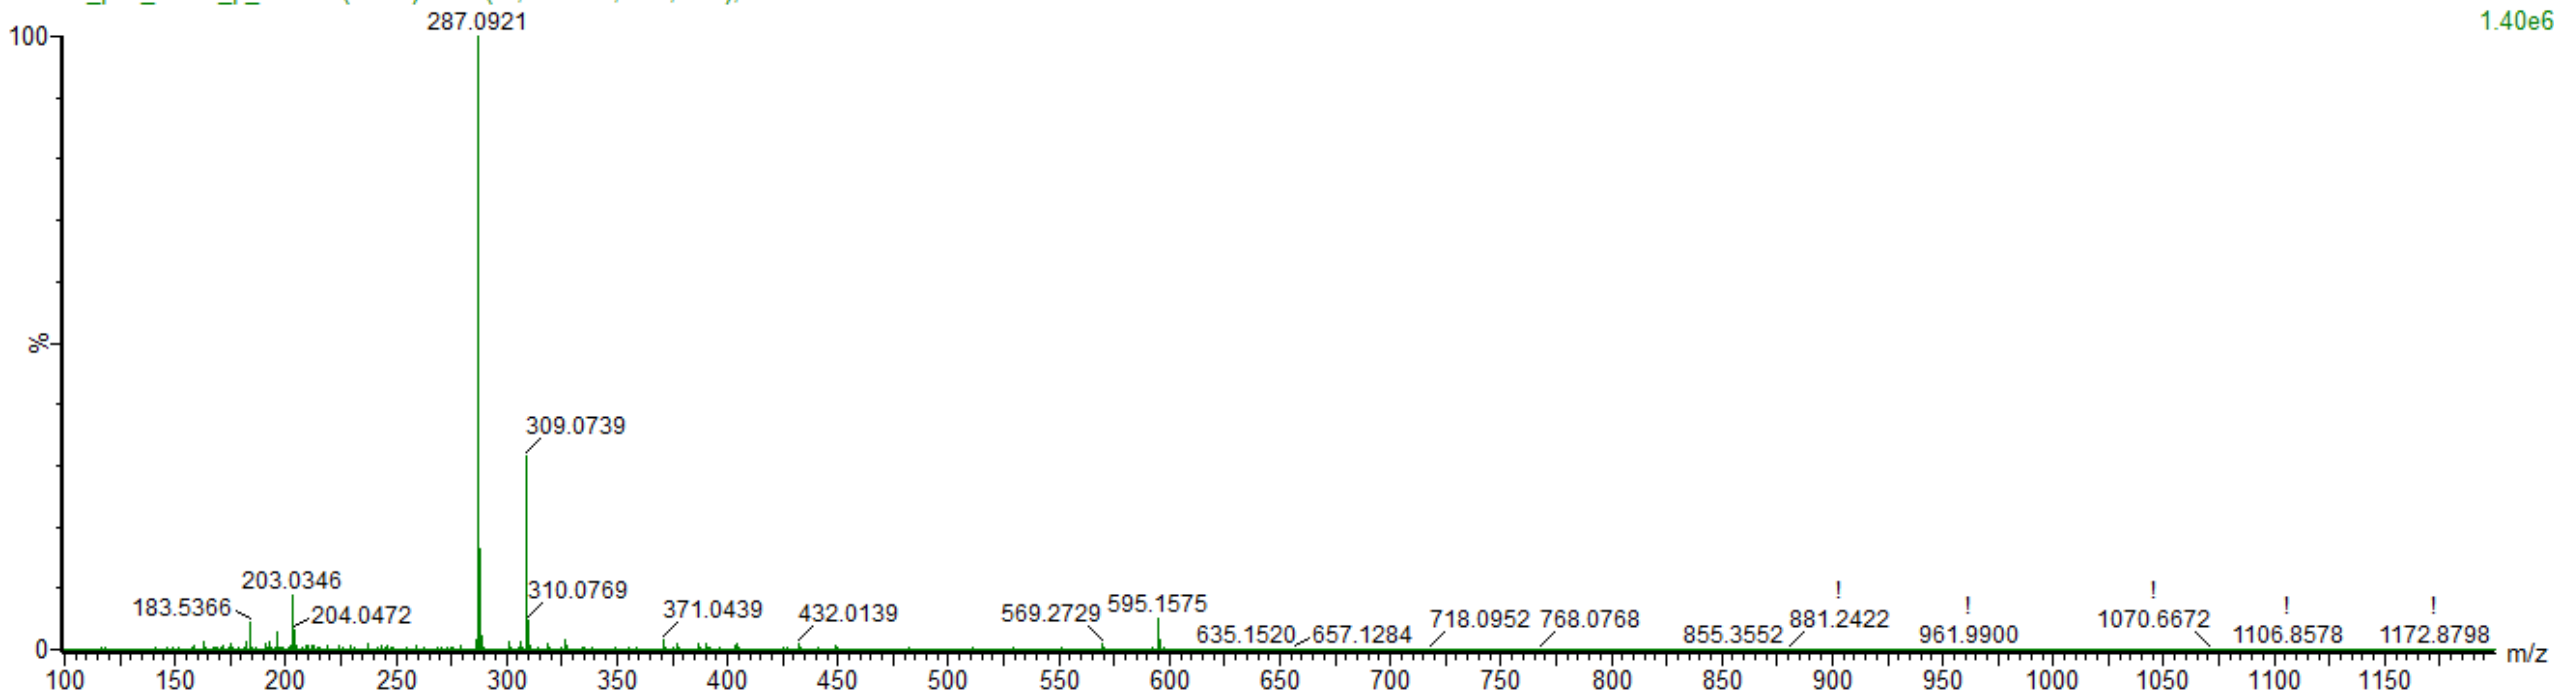

**Figure S5.** ESI-QToF-MS spectrum of 5-[(3-hydroxy-3-methyl-1-butenyl)oxy]psoralen (peak 4).



220321\_peuce\_CH2Cl2\_2 427 (7.878) AM2 (Ar,20000.0,0.00,0.00); ABS

1: TOF MS ES+  
3.59e4

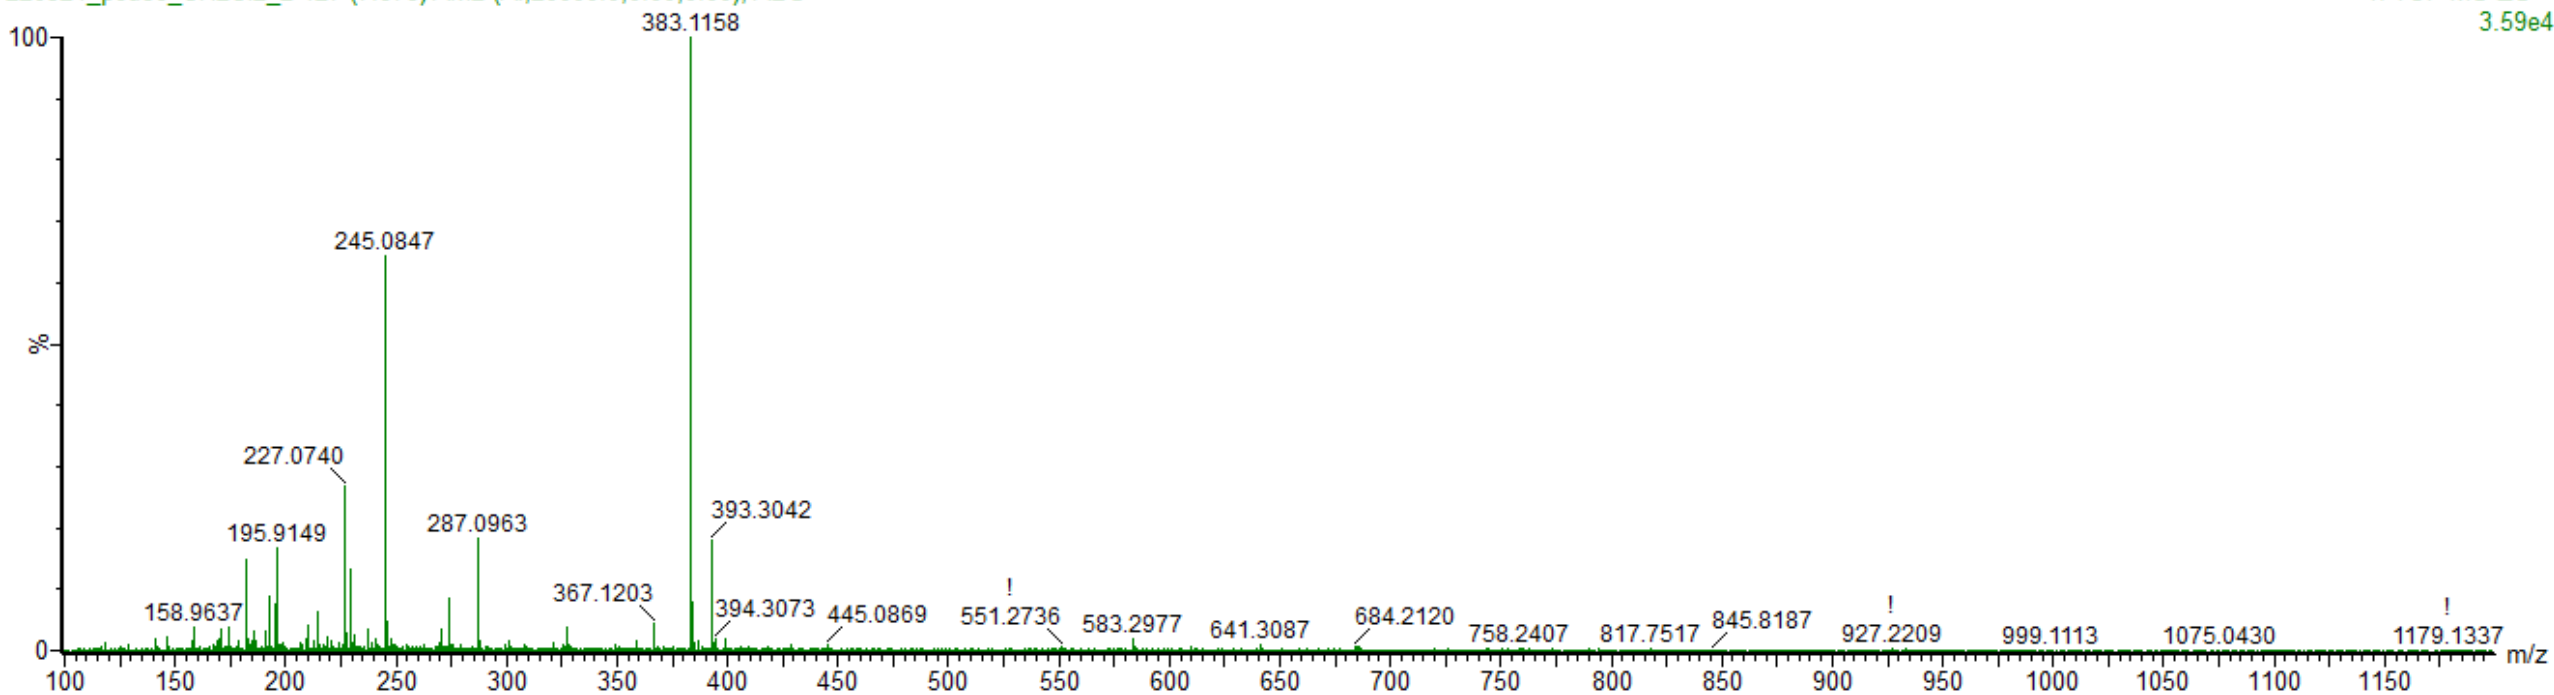

**Figure S6.** ESI-QToF-MS spectrum of 3'-O-acetyl-4'-O-propanoylkhellactone (peak 5).

220530\_peu\_flower\_p\_03 448 (8.261) AM2 (Ar,20000.0,0.00,0.00); ABS

1: TOF MS ES+

4.56e5

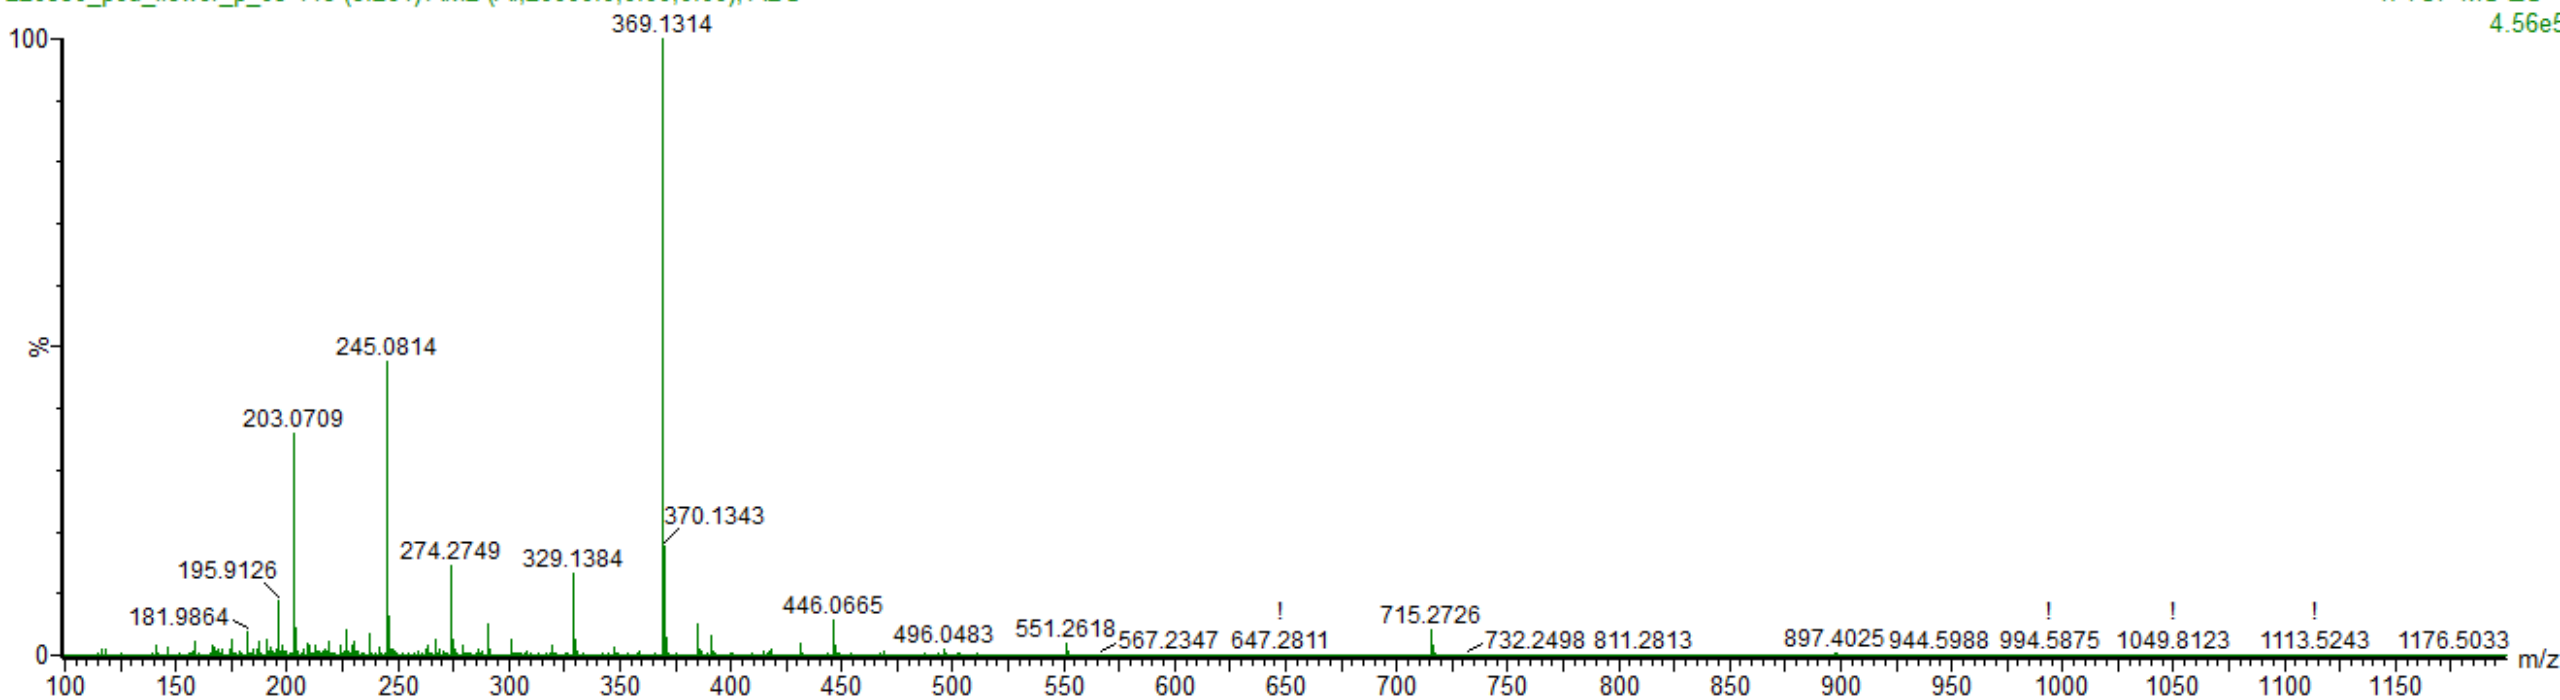

**Figure S7.** ESI-QToF-MS spectrum of 3'- O-(2-methyl-butyryl)-4'-hydroxy khellactone (or 3'-O-(isovaleryl)-4'-hydroxy khellactone) (peak 6)

220530\_peu\_flower\_p\_03 524 (9.667) AM2 (Ar,20000.0,0.00,0.00); ABS

1: TOF MS ES+

5.05e5

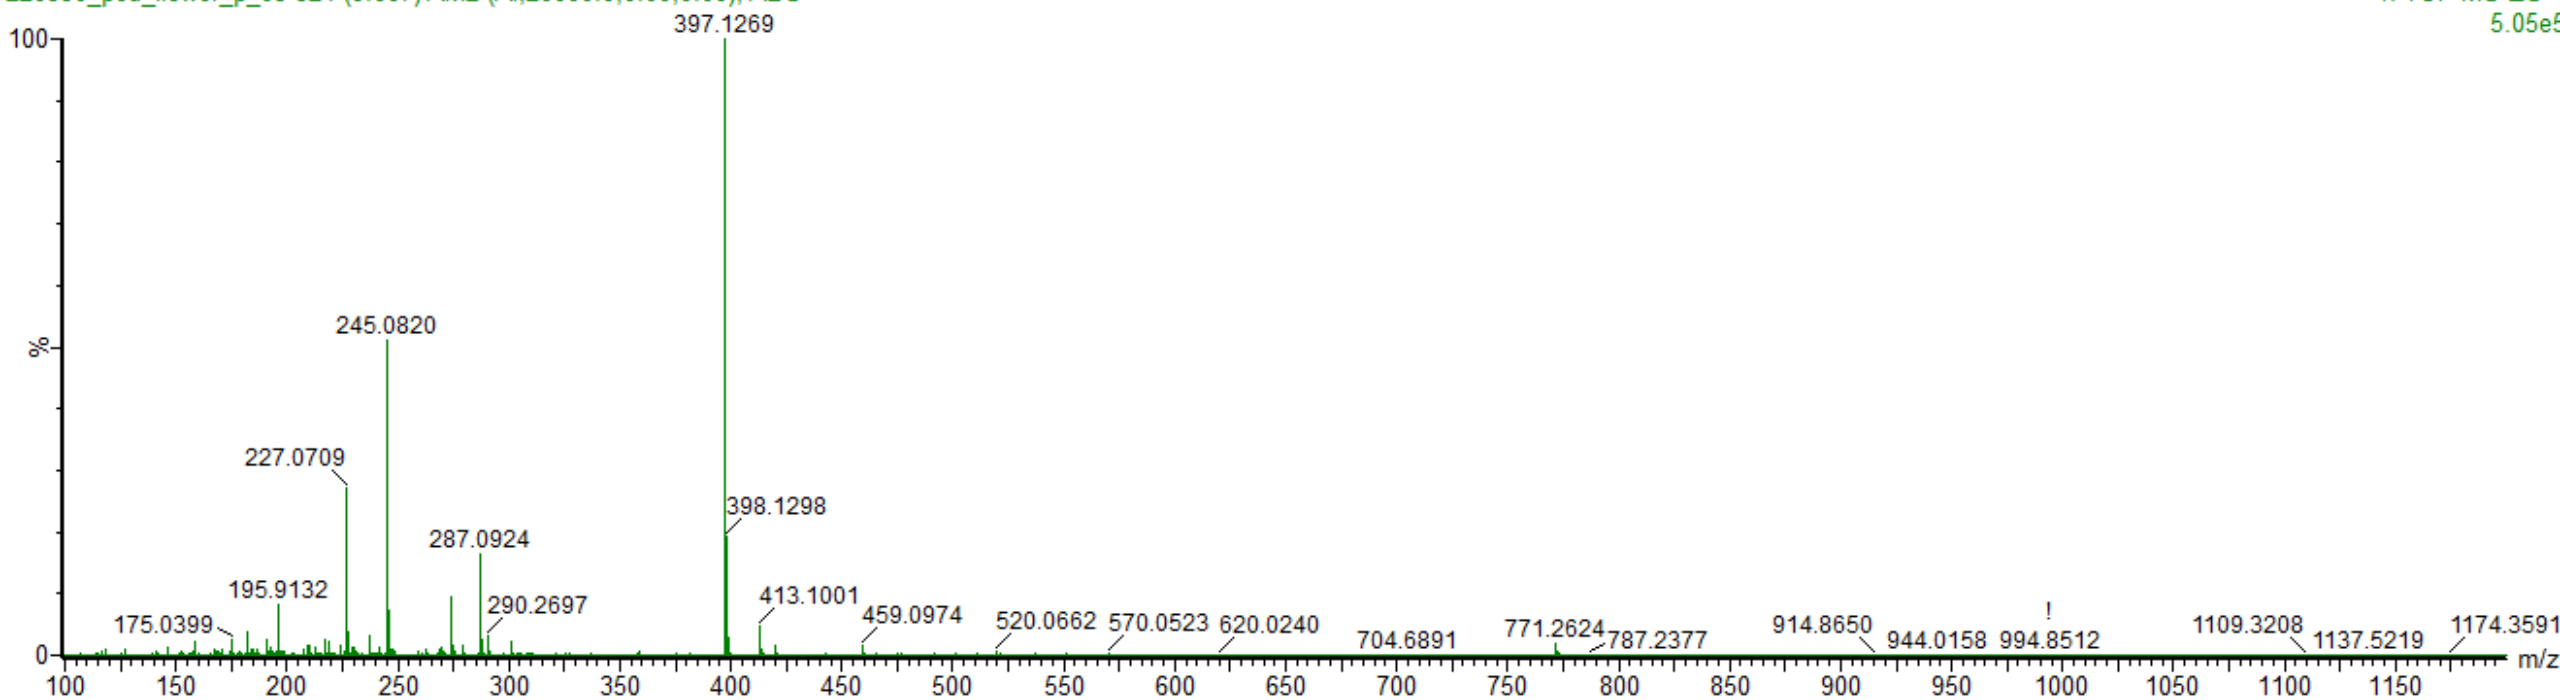

**Figure S8.** ESI-QToF-MS spectrum of 3'-O-acetyl-4'-O-isobutyryl khellactone (hyuganin D) (peak 7).

220530\_peu\_flower\_p\_03 543 (10.015) AM2 (Ar,20000.0,0.00,0.00); ABS

1: TOF MS ES+  
3.52e6

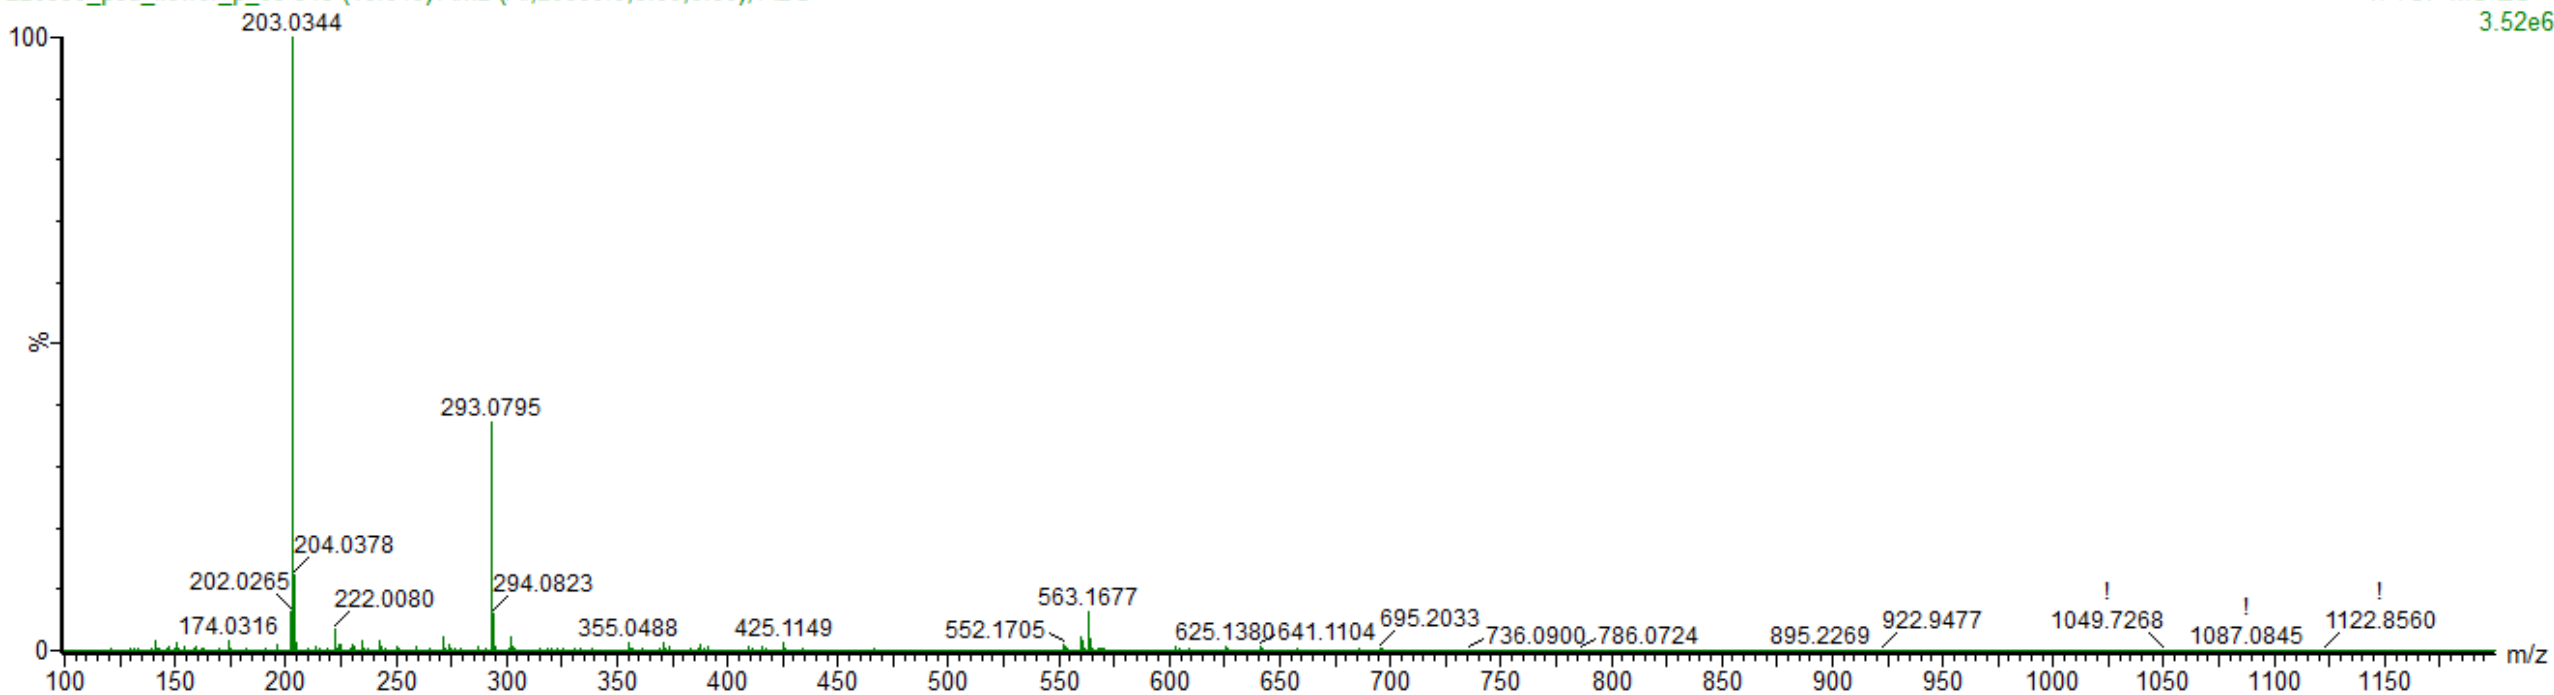

**Figure S9.** ESI-QToF-MS spectrum of isoimpertorin (peak 8).

220530\_peu\_flower\_p\_03 574 (10.581) AM2 (Ar,20000.0,0.00,0.00); ABS

1: TOF MS ES+  
9.61e5

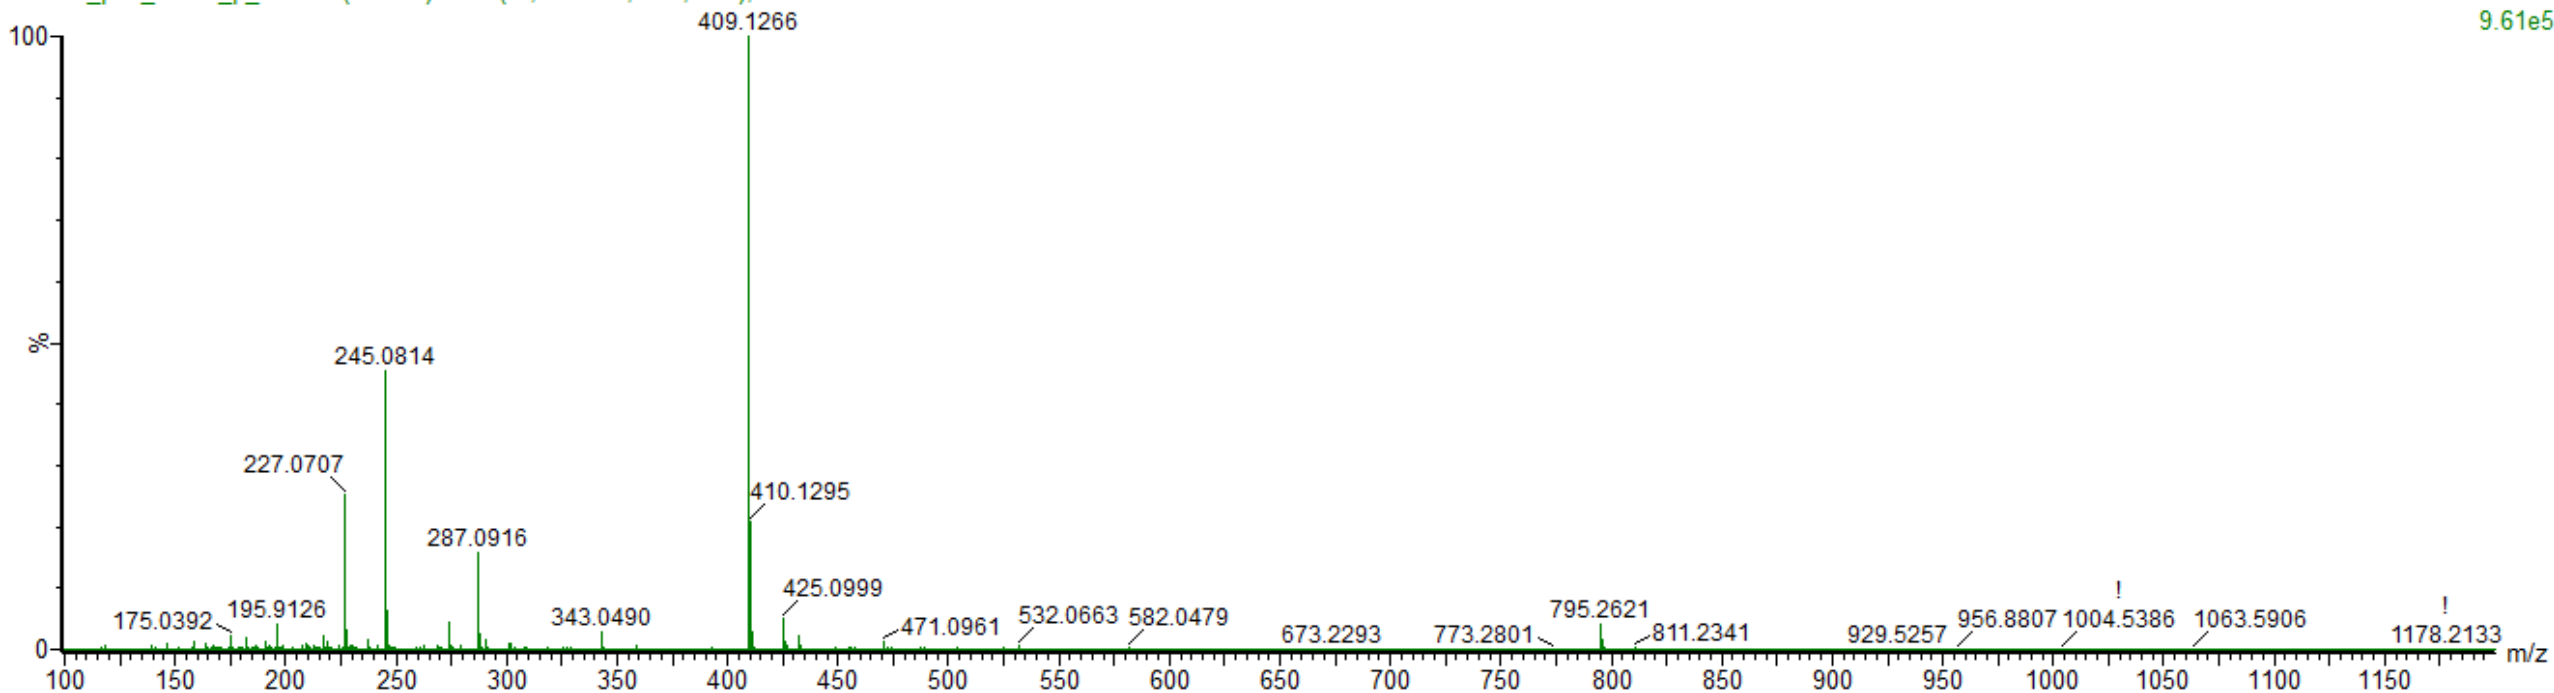

**Figure S10.** ESI-QToF-MS spectrum of 3'-O-acetyl-4'-O-angeloylkhellactone (pteryxin) (peak 9).

220530\_peu\_flower\_p\_03 579 (10.678) AM2 (Ar,20000.0,0.00,0.00); ABS

1: TOF MS ES+  
8.44e5

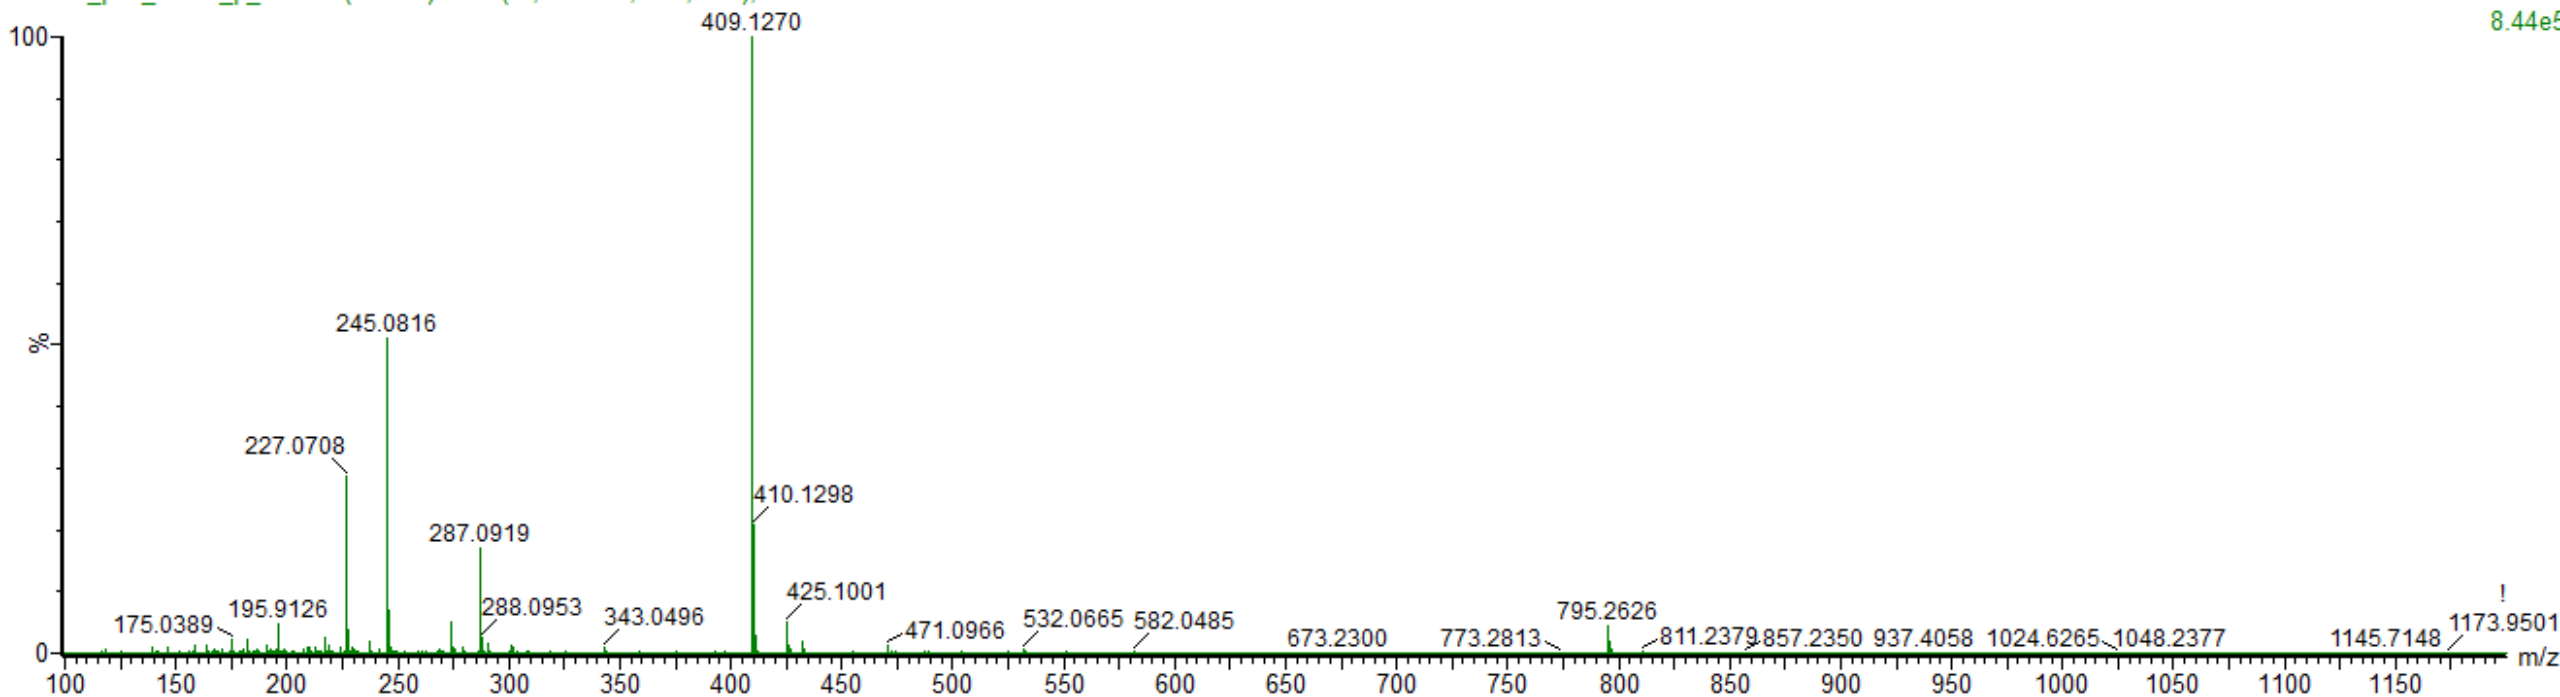

**Figure S11.** ESI-QToF-MS spectrum of 3'-O-acetyl-4'-O-seneciodylhellactone (peak 10).

220530\_peu\_flower\_p\_03 650 (11.987) AM2 (Ar,20000.0,0.00,0.00); ABS

1: TOF MS ES+  
4.66e6

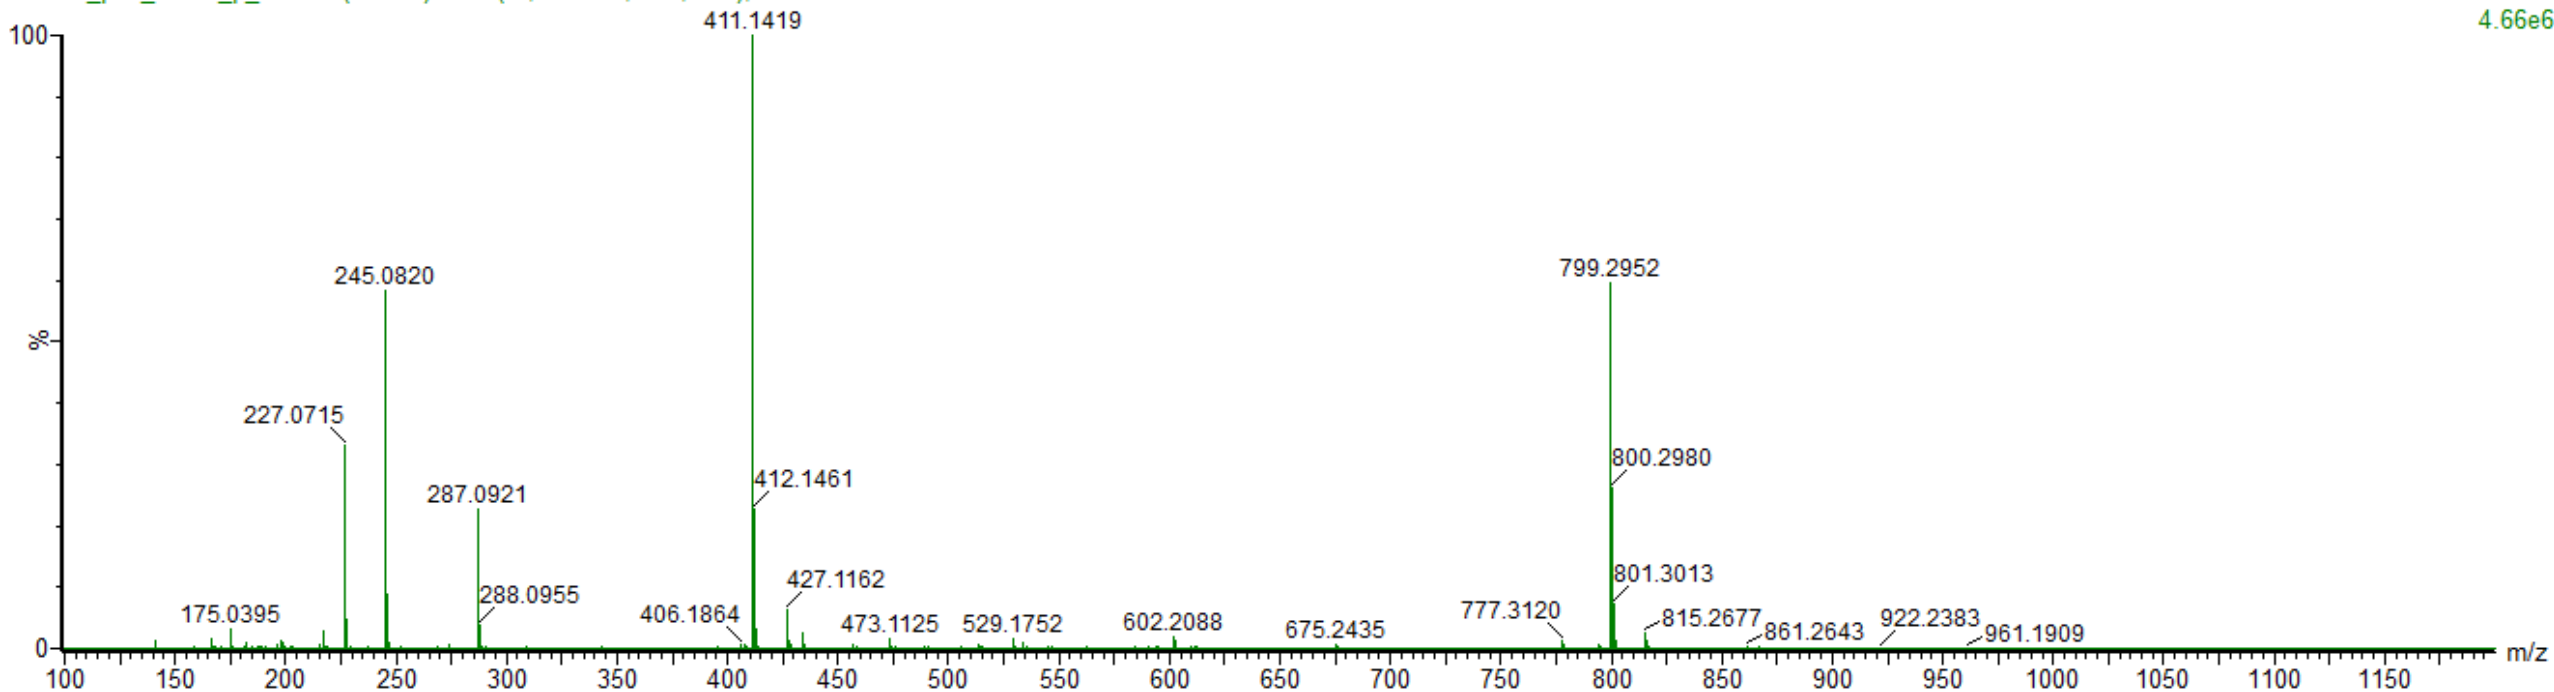

**Figure S12.** ESI-QToF-MS spectrum of 3'-O-acetyl-4'-O-(2-methyl butanoate)khellactone (or 3'-O-acetyl-4'-O-isovalerylkhellactone) (peak 11).

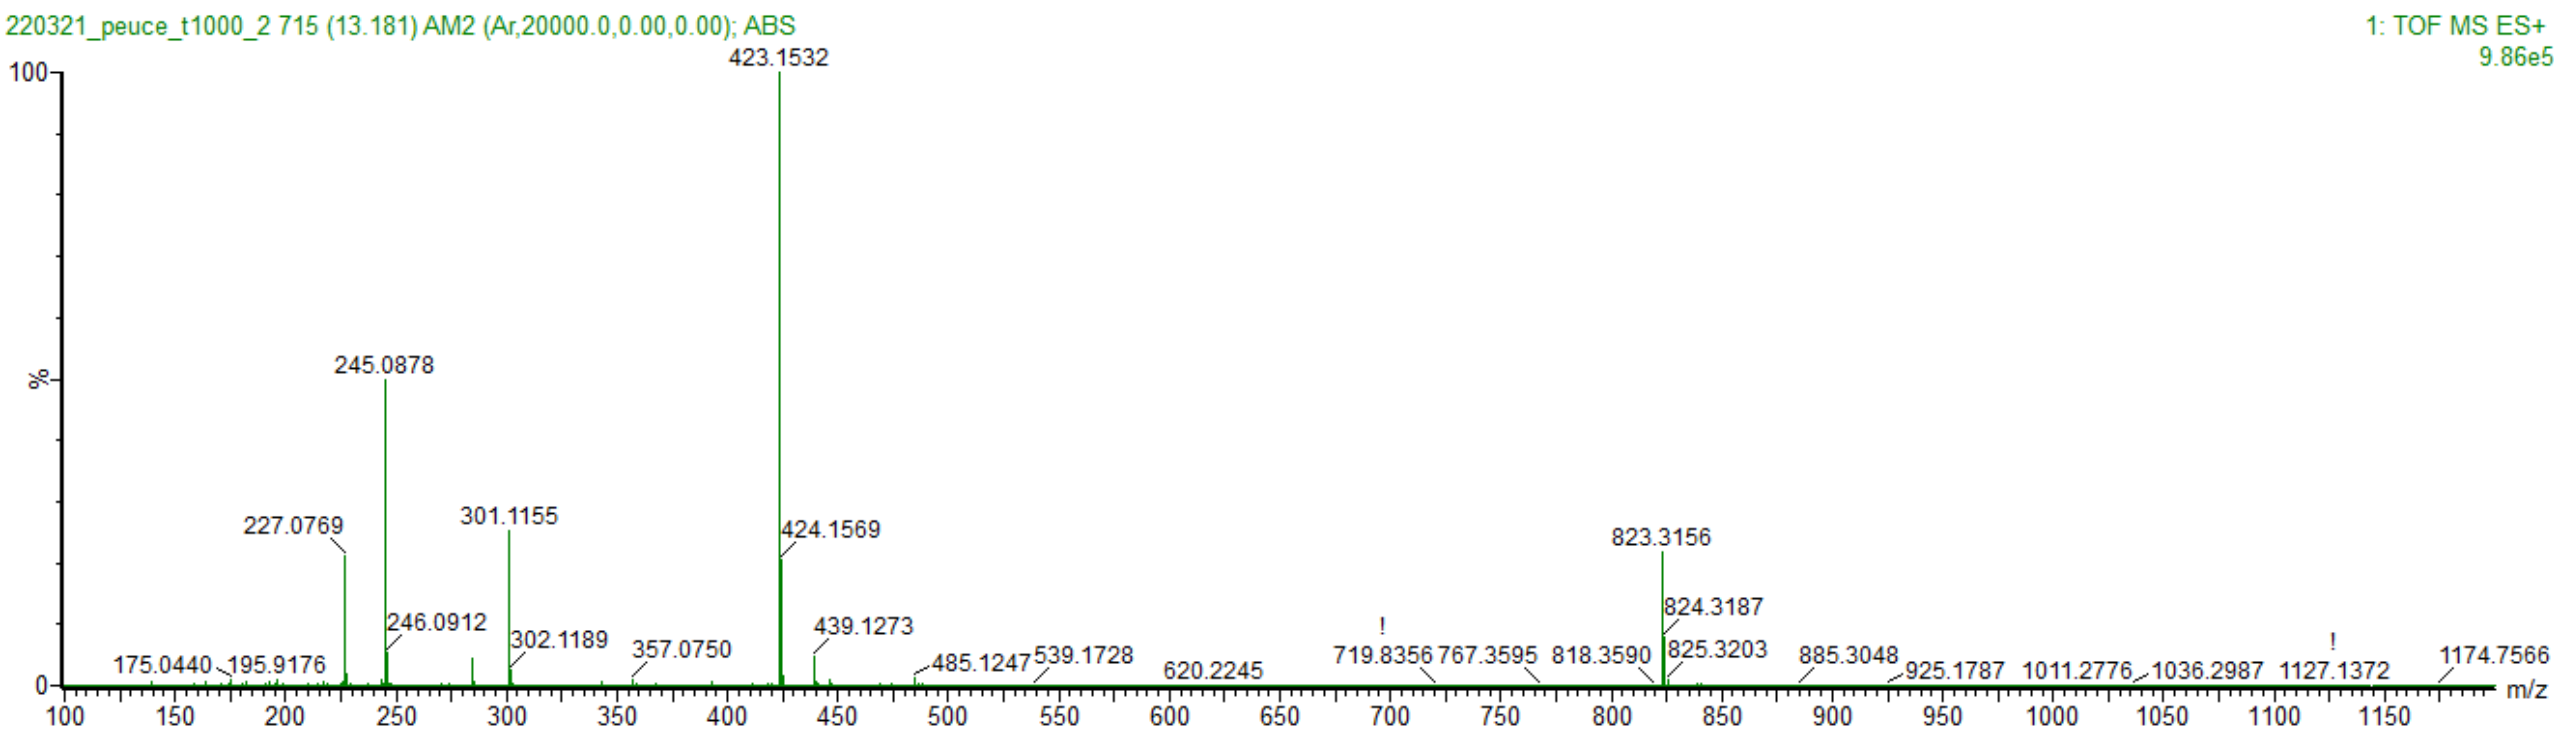

**Figure S13.** ESI-QToF-MS spectrum of 3'-O-propanoyl-4'-O-angeloyl khellactone (or 3'-O-propanoyl-4'-O-senecioylkhellactone) (peak 12).



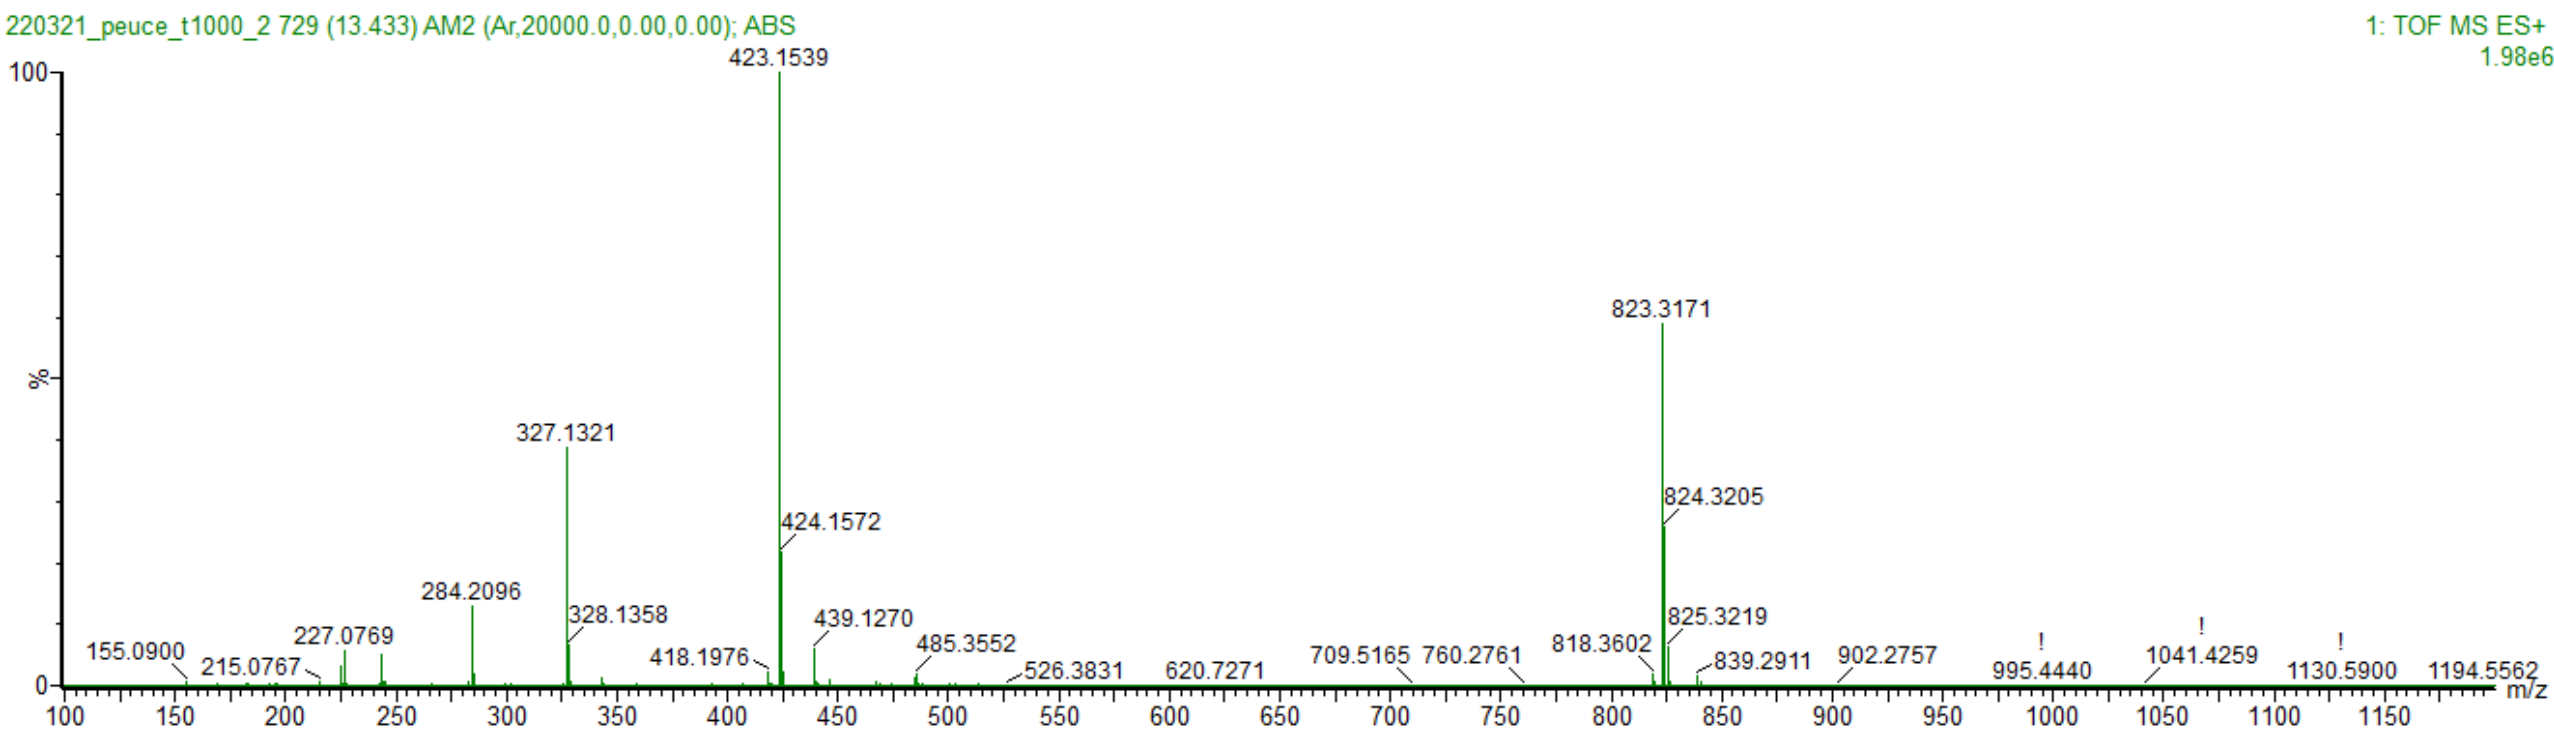

**Figure S14.** ESI-QToF-MS spectrum of 3'-O-angeloyl-4'-O-propanoylkhellactone (or 3'-O-senecioid-4'-O-propanoylkhellactone) (peak 13).

220530\_peu\_flower\_p\_03 789 (14.542) AM2 (Ar,20000.0,0.00,0.00); ABS; Cm (784:799)

1: TOF MS ES+  
6.40e6

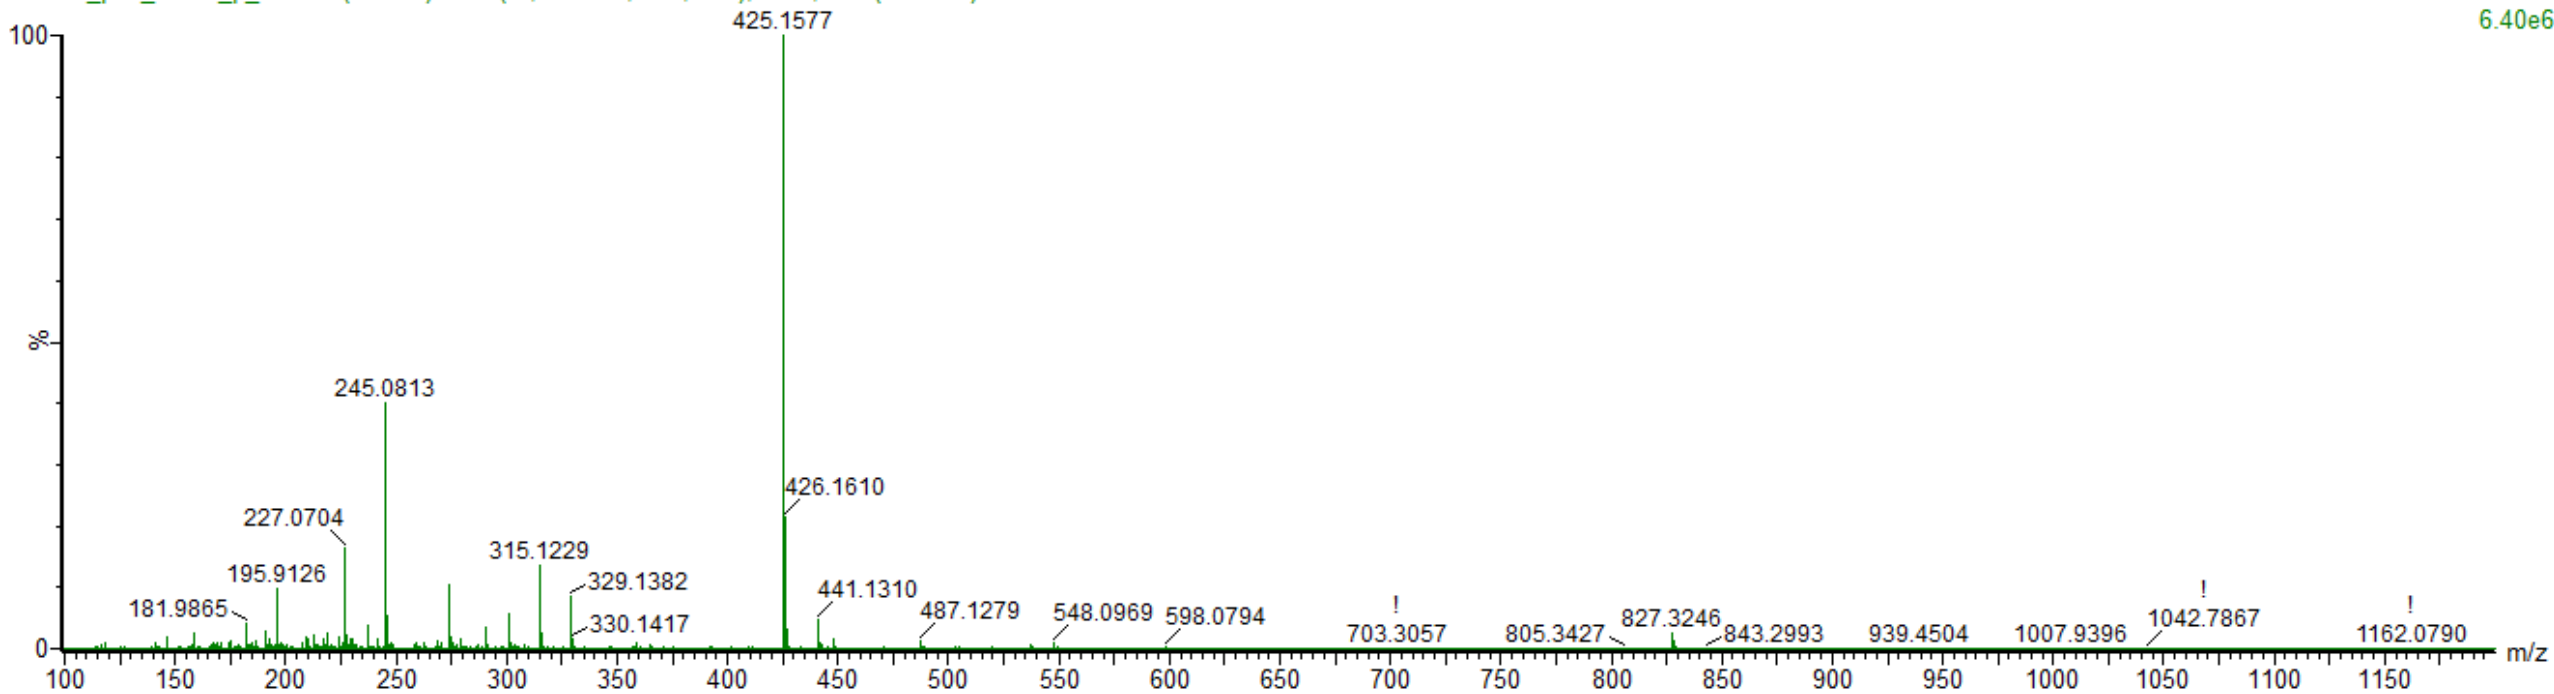

**Figure S15.** ESI-QToF-MS spectrum of 3'-O-isobutyryl-4'-O-isobutyrylhellactone (peak 14).

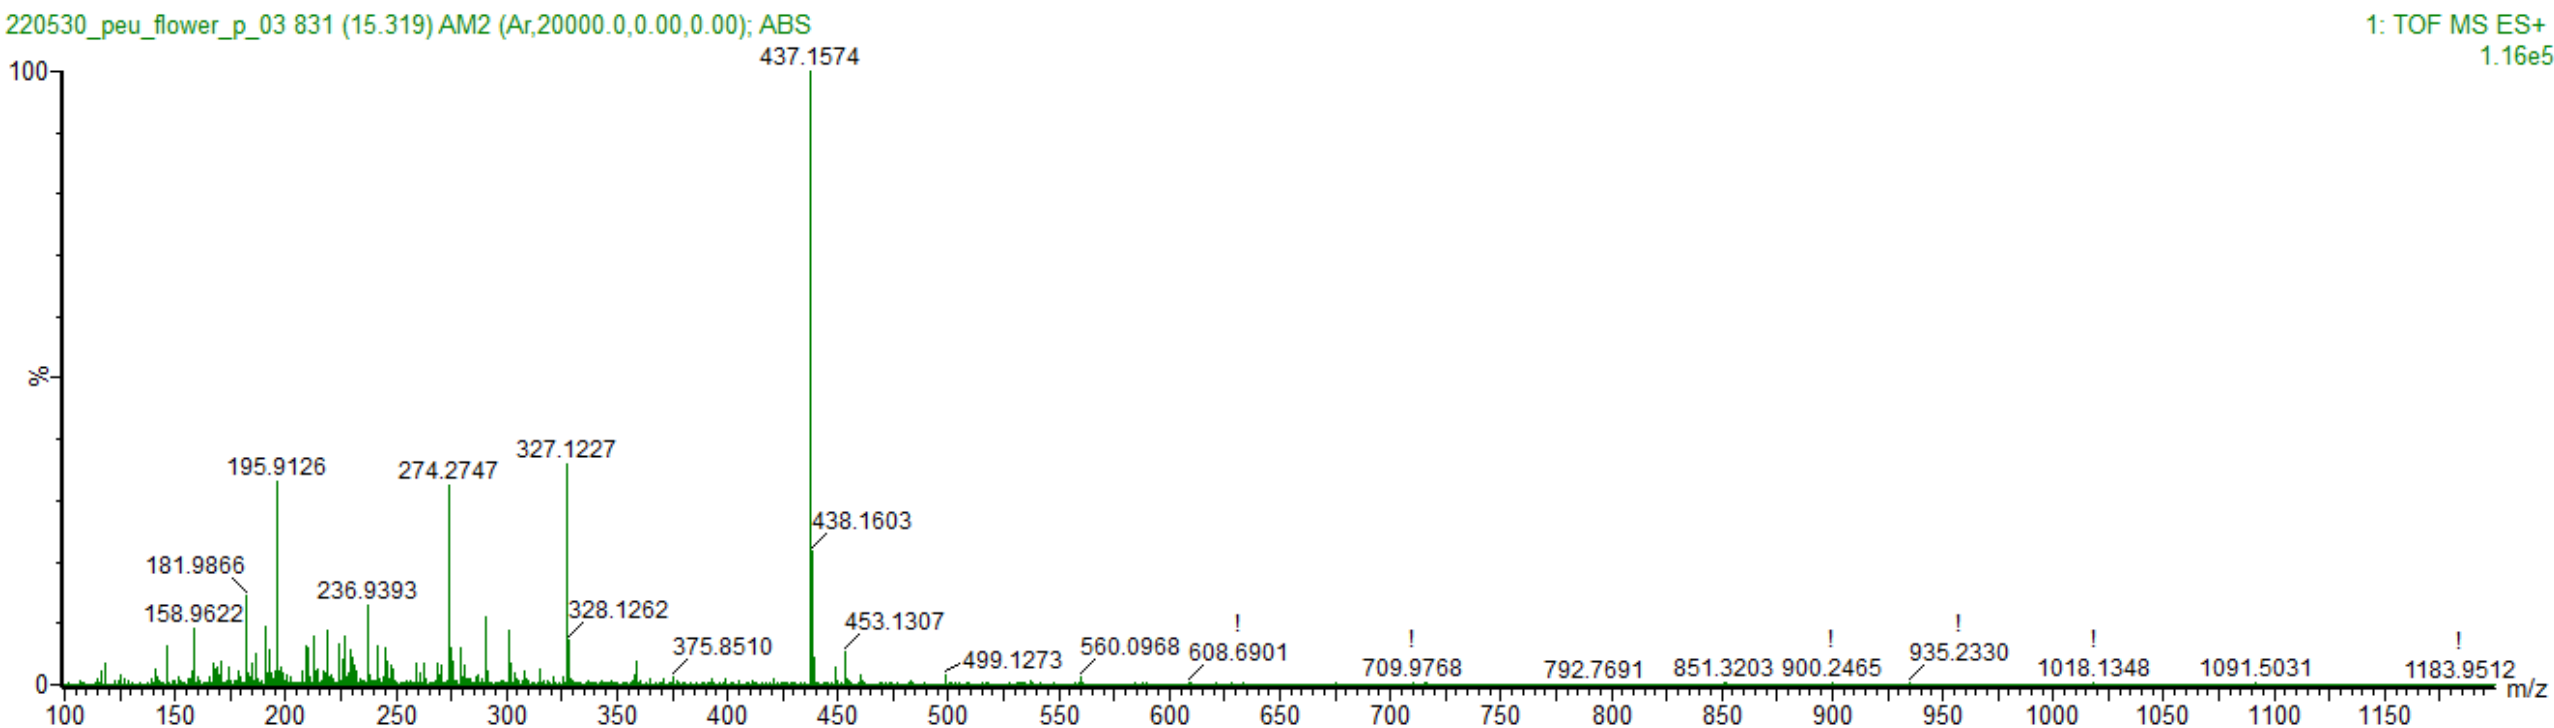

**Figure S16.** ESI-QToF-MS spectrum of 3'-O-angeloyl-4'-O-isobutyrylhellactone (peak 15).

220530\_peu\_flower\_p\_03 837 (15.422) AM2 (Ar,20000.0,0.00,0.00); ABS

1: TOF MS ES+  
2.10e5

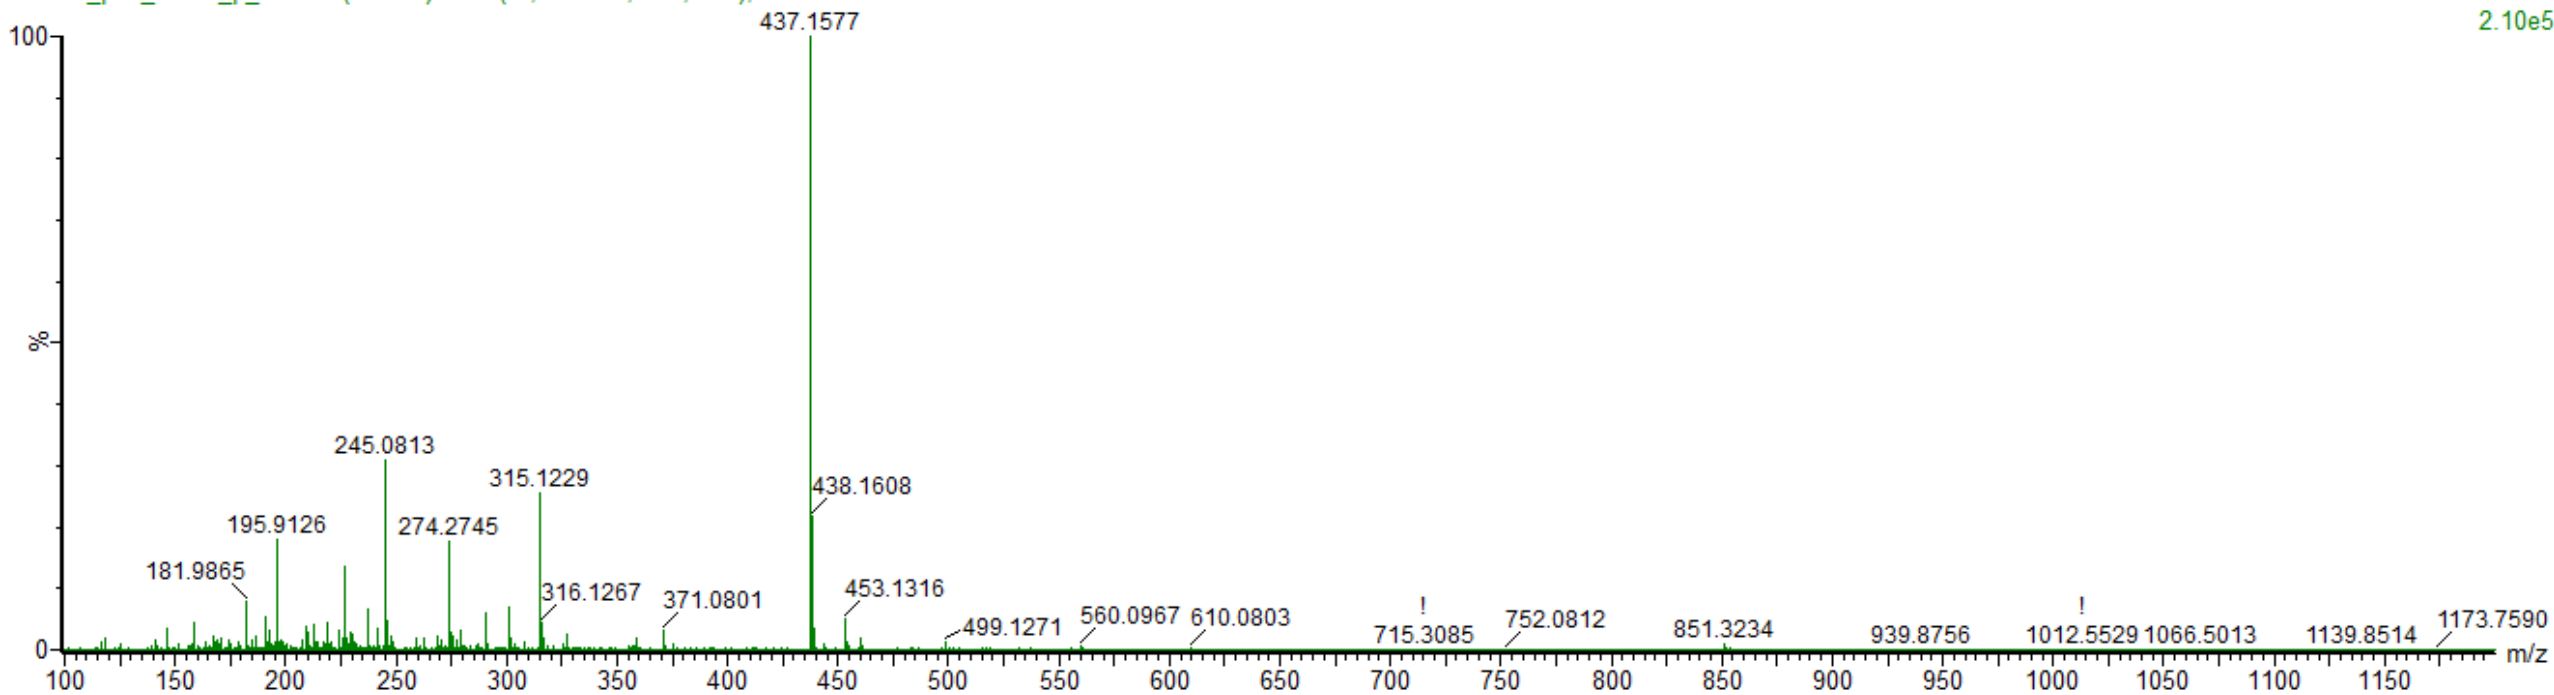

**Figure S17.** ESI-QToF-MS spectrum of 3'-O- isobutyryl-4'-O-angeloylkhellactone (peak 16).

220530\_peu\_flower\_p\_03 850 (15.667) AM2 (Ar,20000.0,0.00,0.00); ABS

1: TOF MS ES+  
2.66e5

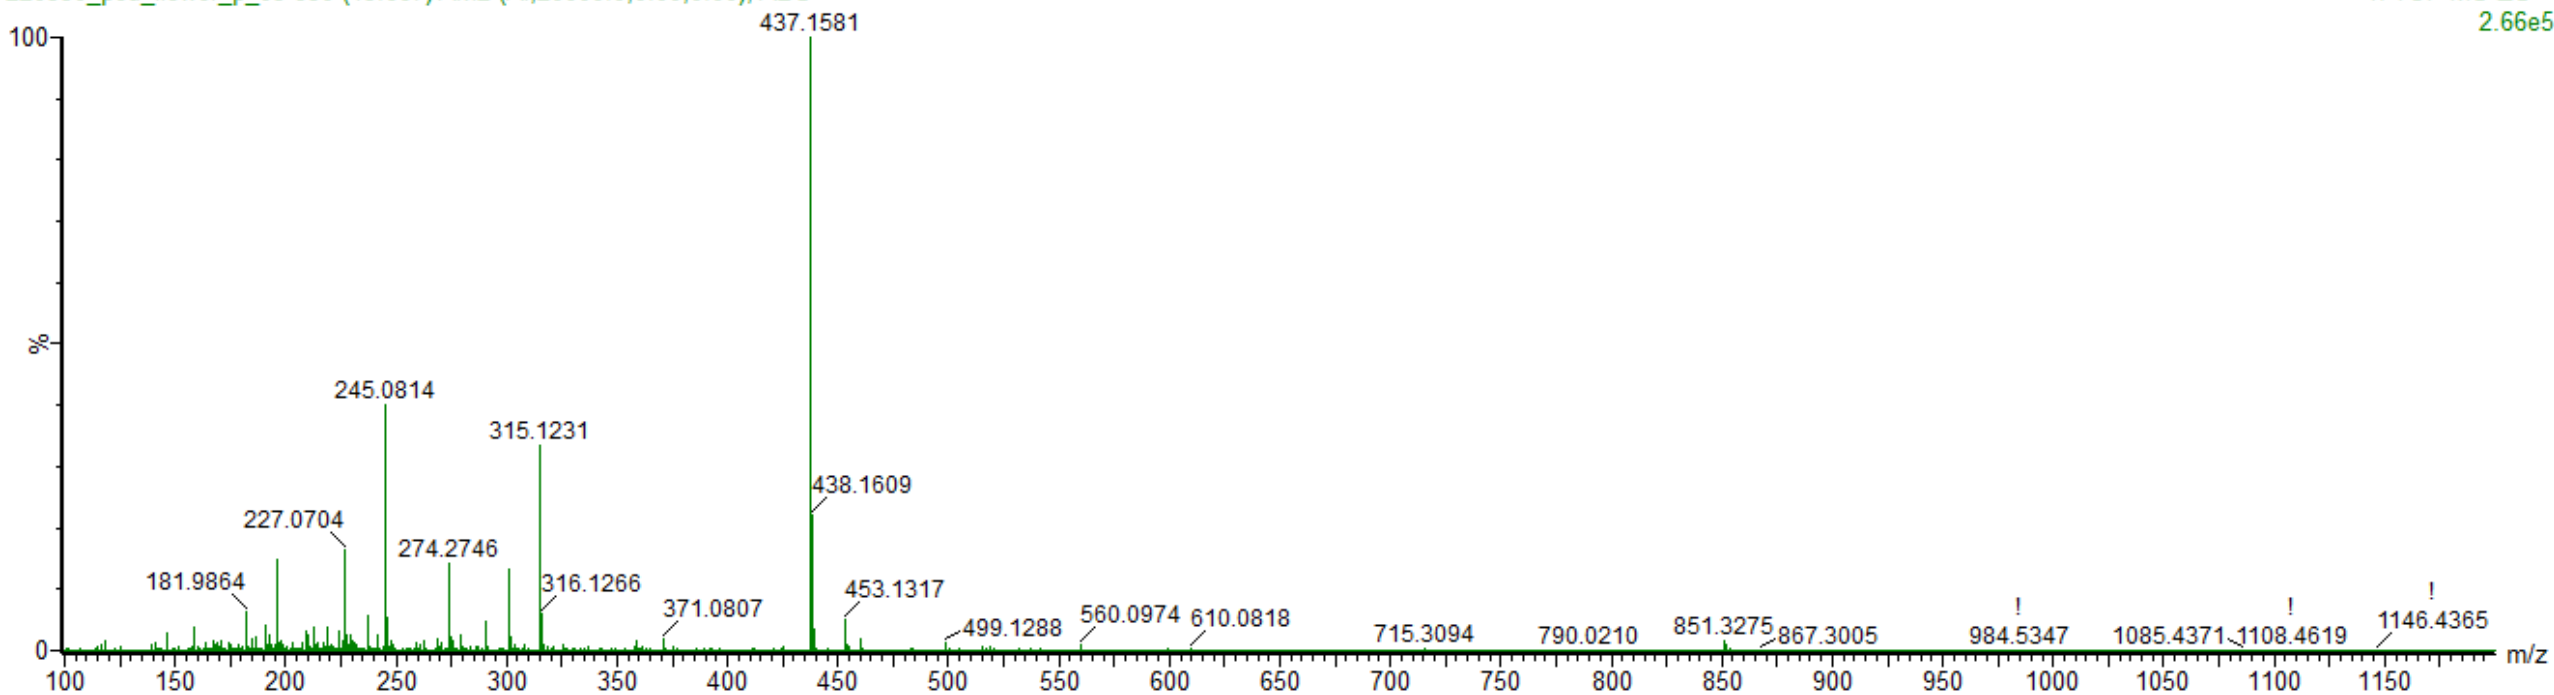

**Figure S18.** ESI-QToF-MS spectrum of 3'-O-isobutyryl-4'-O-senecioidhellactone (peak 17).

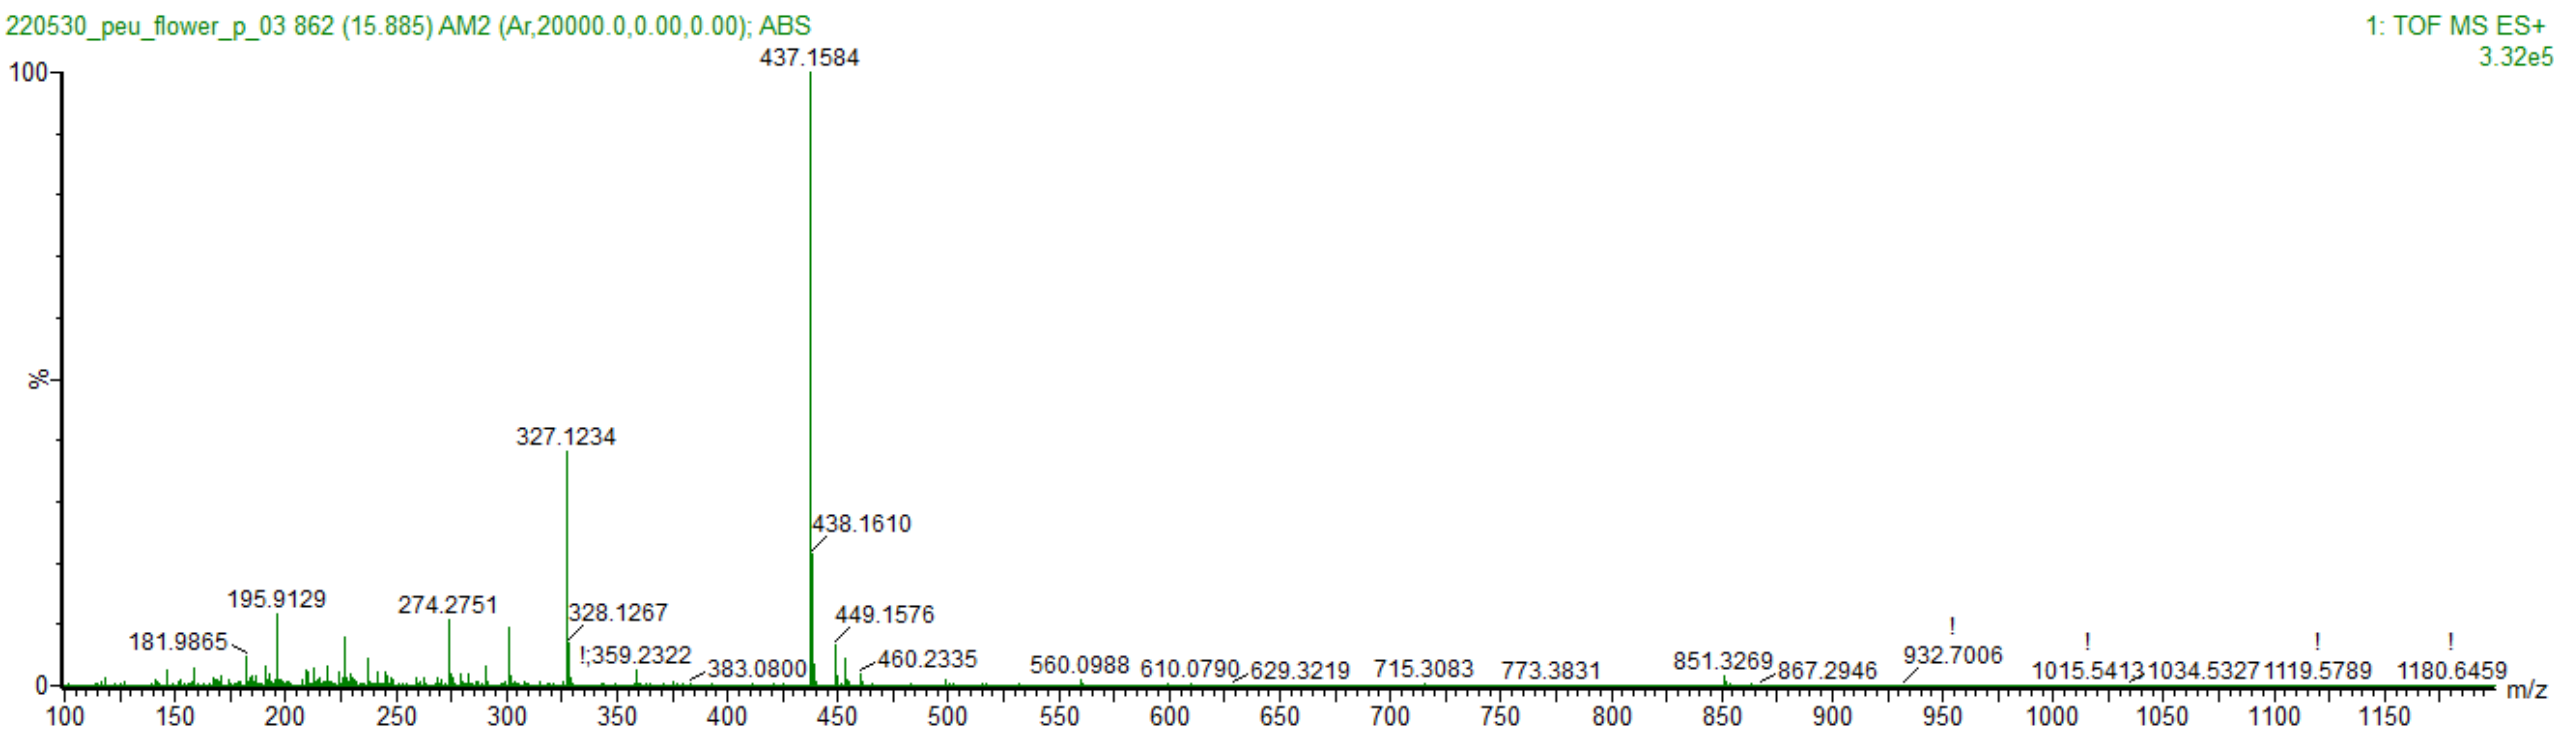

**Figure S19.** ESI-QToF-MS spectrum of 3'-O-senecioid-4'-O-isobutyrylhellactone (peak 18).

220530\_peu\_flower\_p\_03 869 (16.016) AM2 (Ar,20000.0,0.00,0.00); ABS

1: TOF MS ES+  
1.19e6

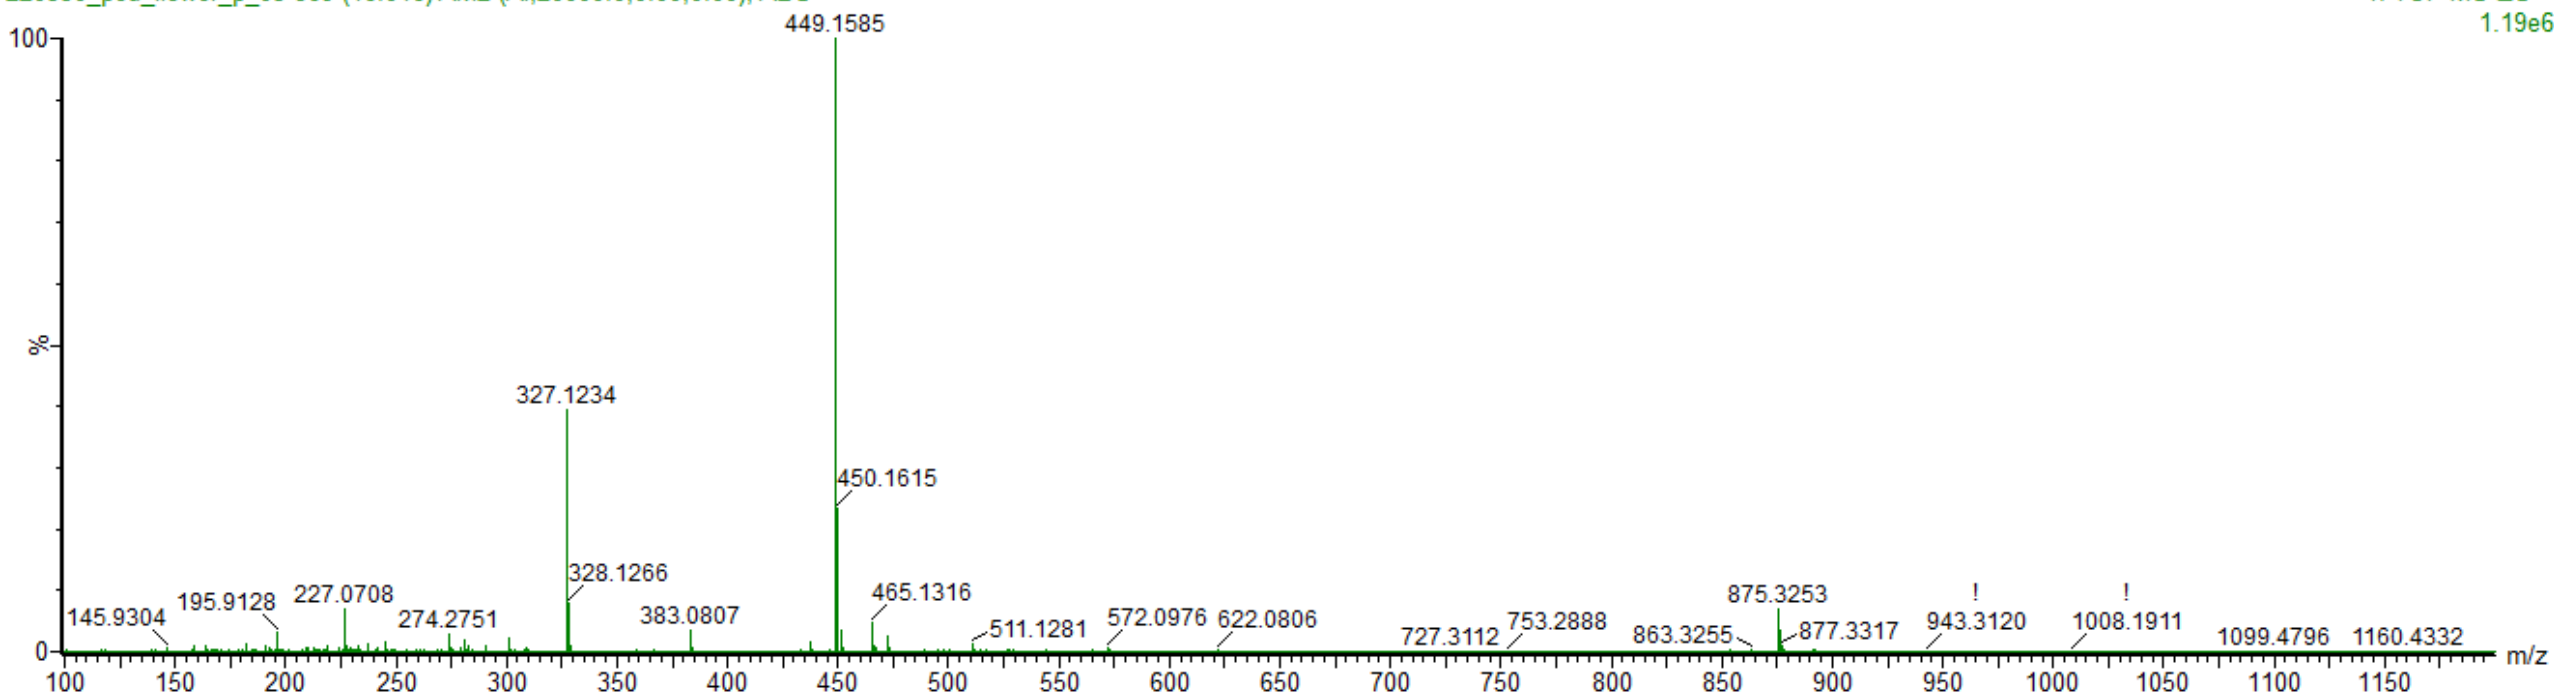

**Figure S20.** ESI-QToF-MS spectrum of 3'-O-angeloyl-4'-O-angeloylkhellactone (paeruptorin B) (peak 19).

220530\_peu\_flower\_p\_03 888 (16.365) AM2 (Ar,20000.0,0.00,0.00); ABS

1: TOF MS ES+  
9.55e4

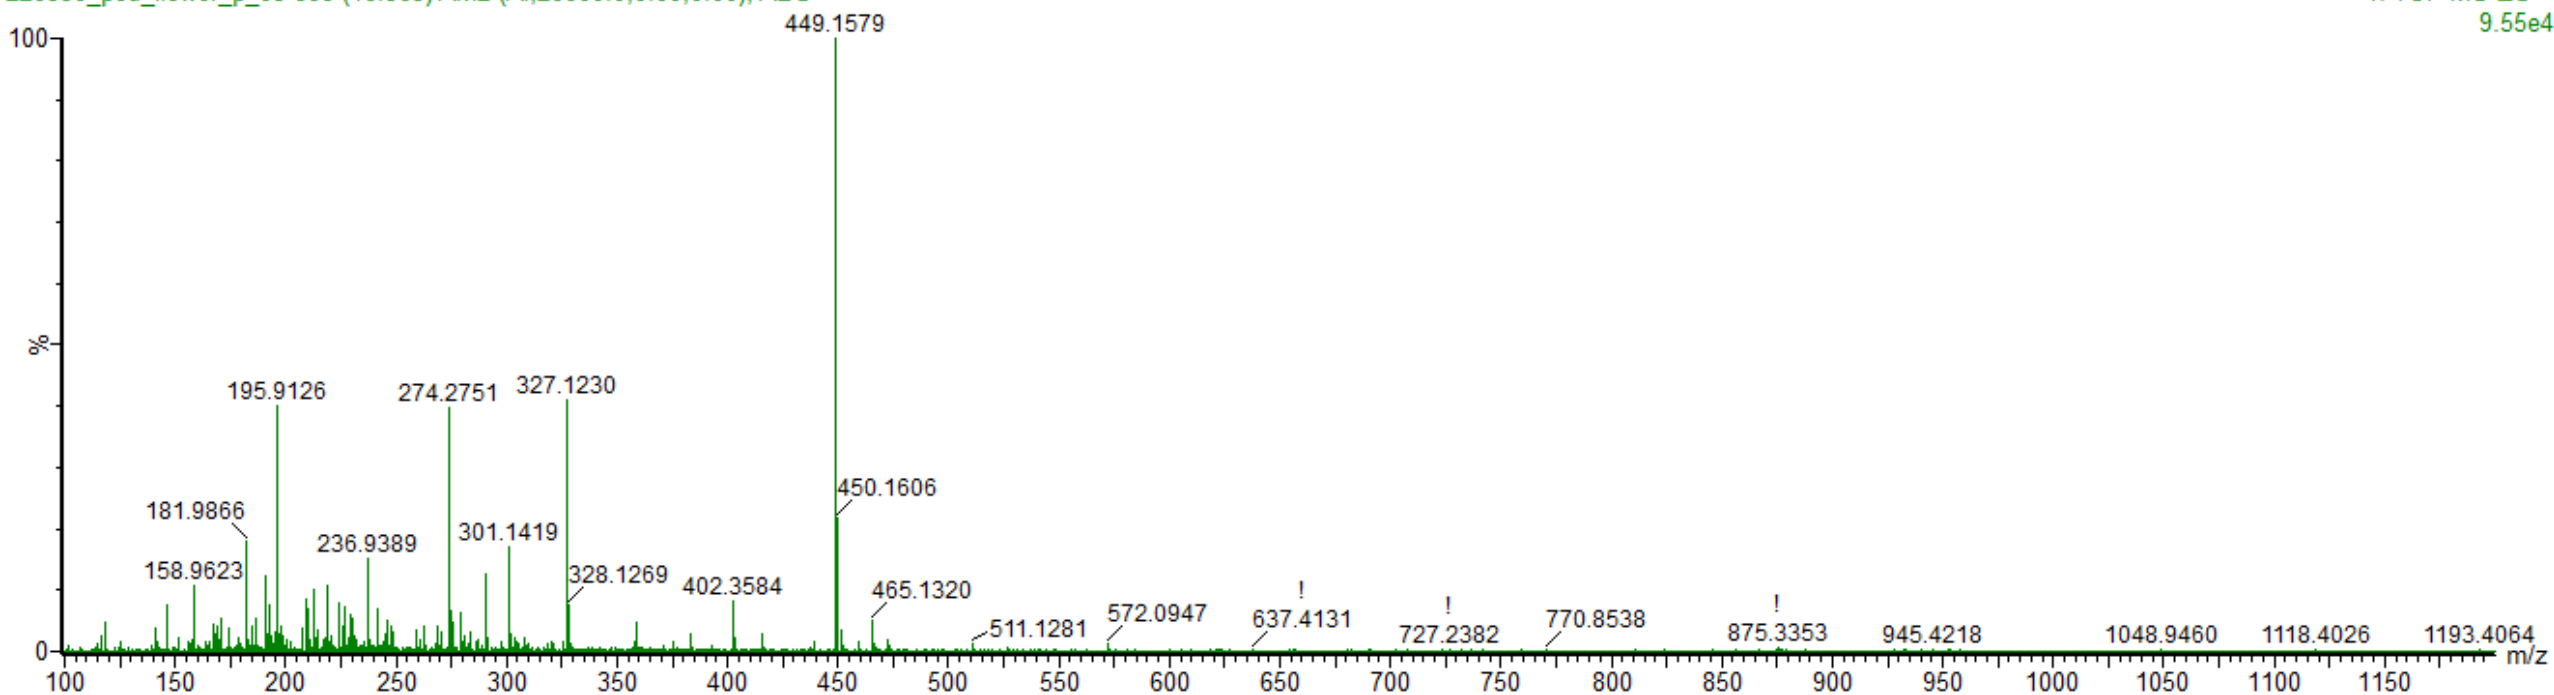

**Figure S21.** ESI-QToF-MS spectrum of 3'-O-angeloyl-4'-O-seneciойlhellactone (peak 20).



220530\_peu\_flower\_p\_03 909 (16.747) AM2 (Ar,20000.0,0.00,0.00); ABS

1: TOF MS ES+  
1.60e5

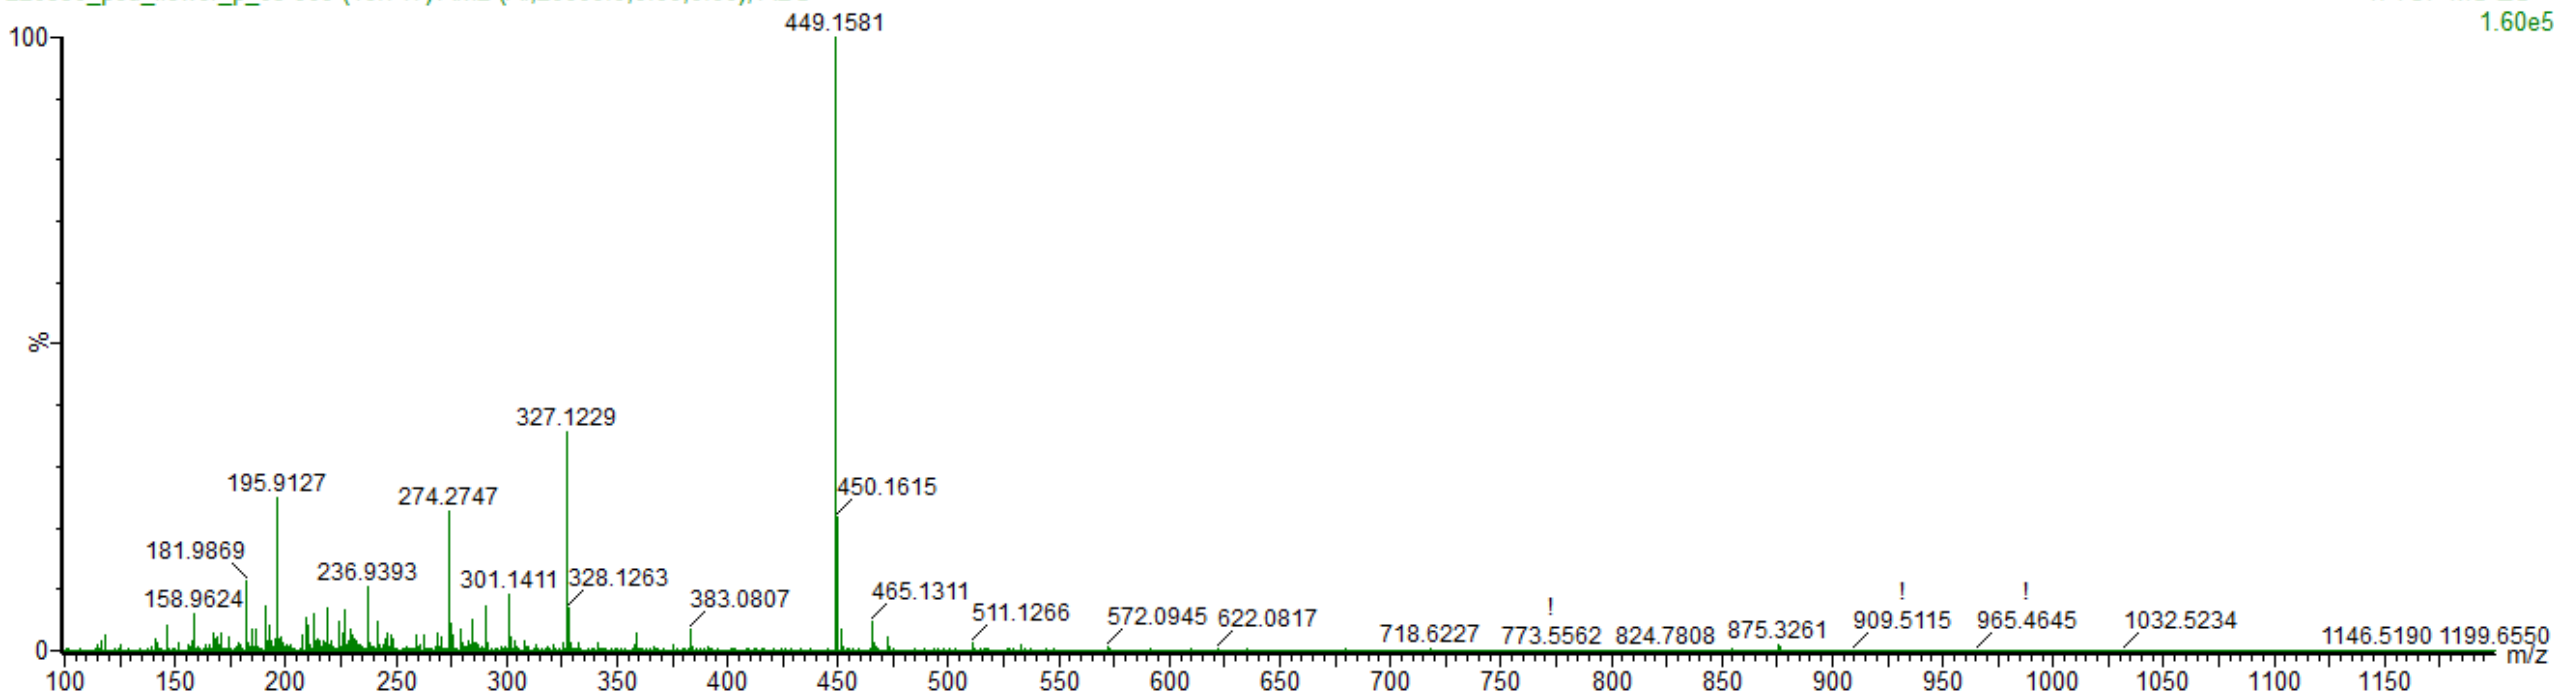

**Figure S22.** ESI-QToF-MS spectrum of 3'-O-senecieryl-4'-O-seneciylkhellactone (peak 21).

220530\_peu\_flower\_p\_03 922 (16.993) AM2 (Ar,20000.0,0.00,0.00); ABS

1: TOF MS ES+  
7.38e5

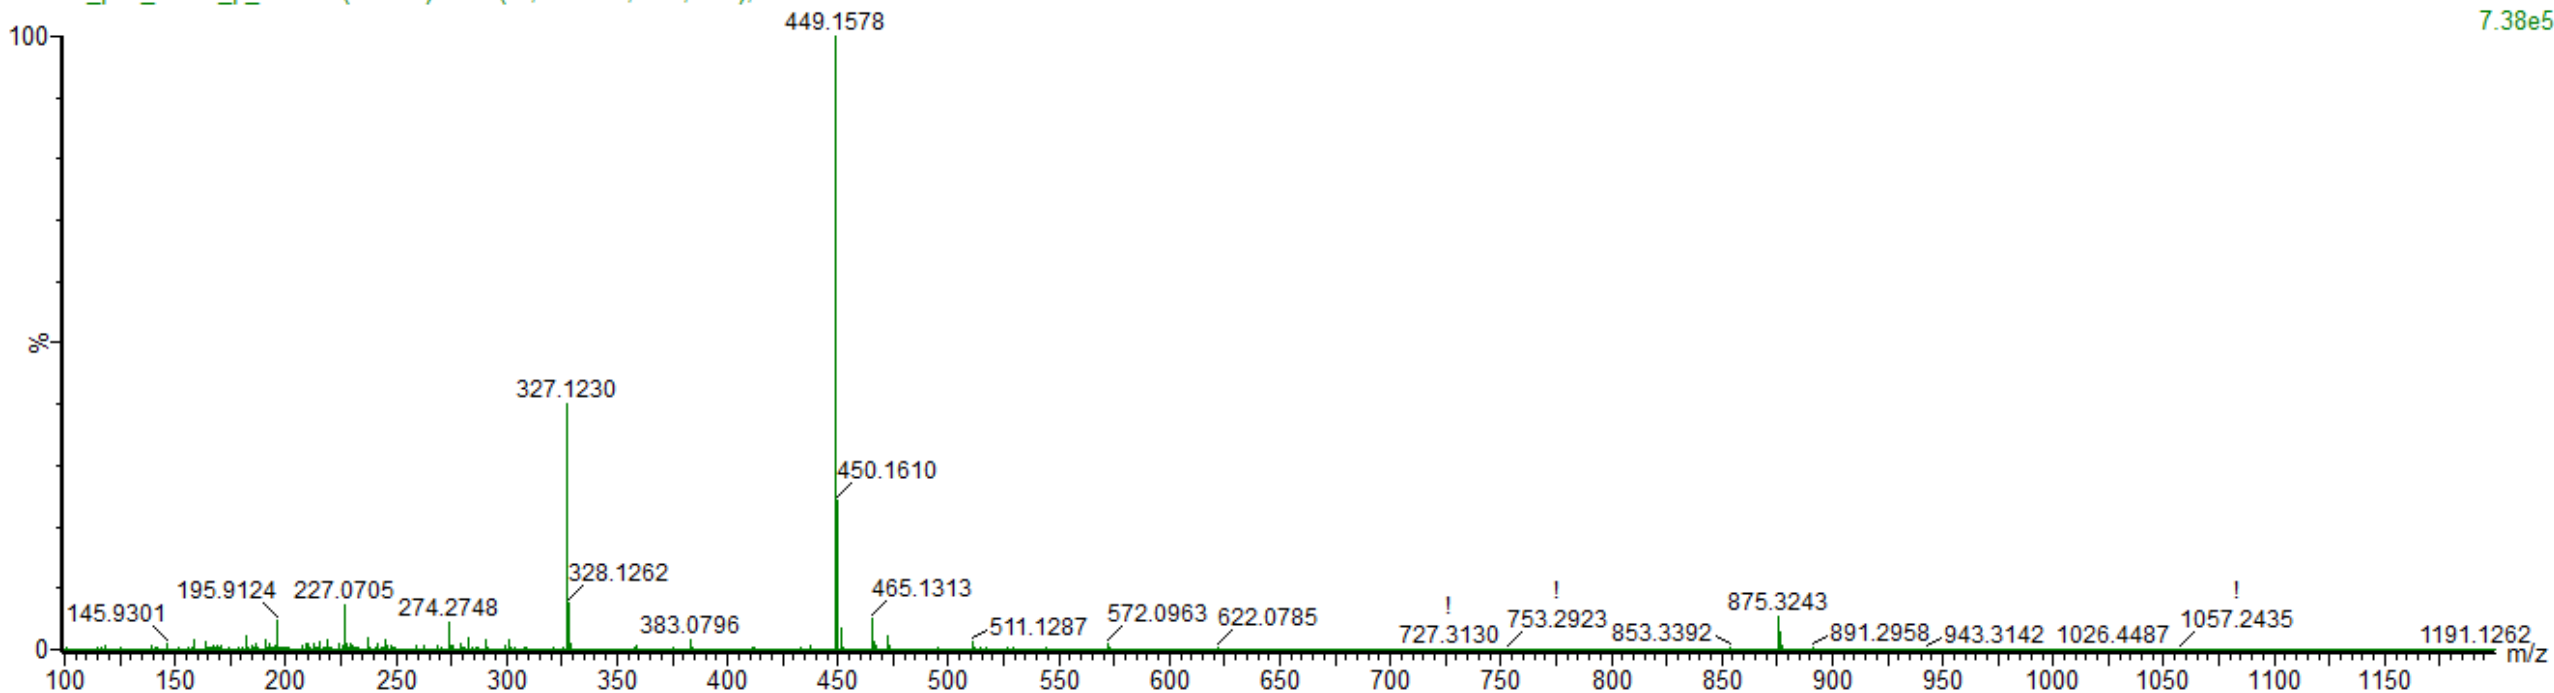

**Figure S23.** ESI-QToF-MS spectrum of 3'-O-senecieryl-4'-O-angeloylhellactone (peak 22).

220530\_peu\_flower\_p\_03 937 (17.273) AM2 (Ar,20000.0,0.00,0.00); ABS

1: TOF MS ES+  
1.49e6

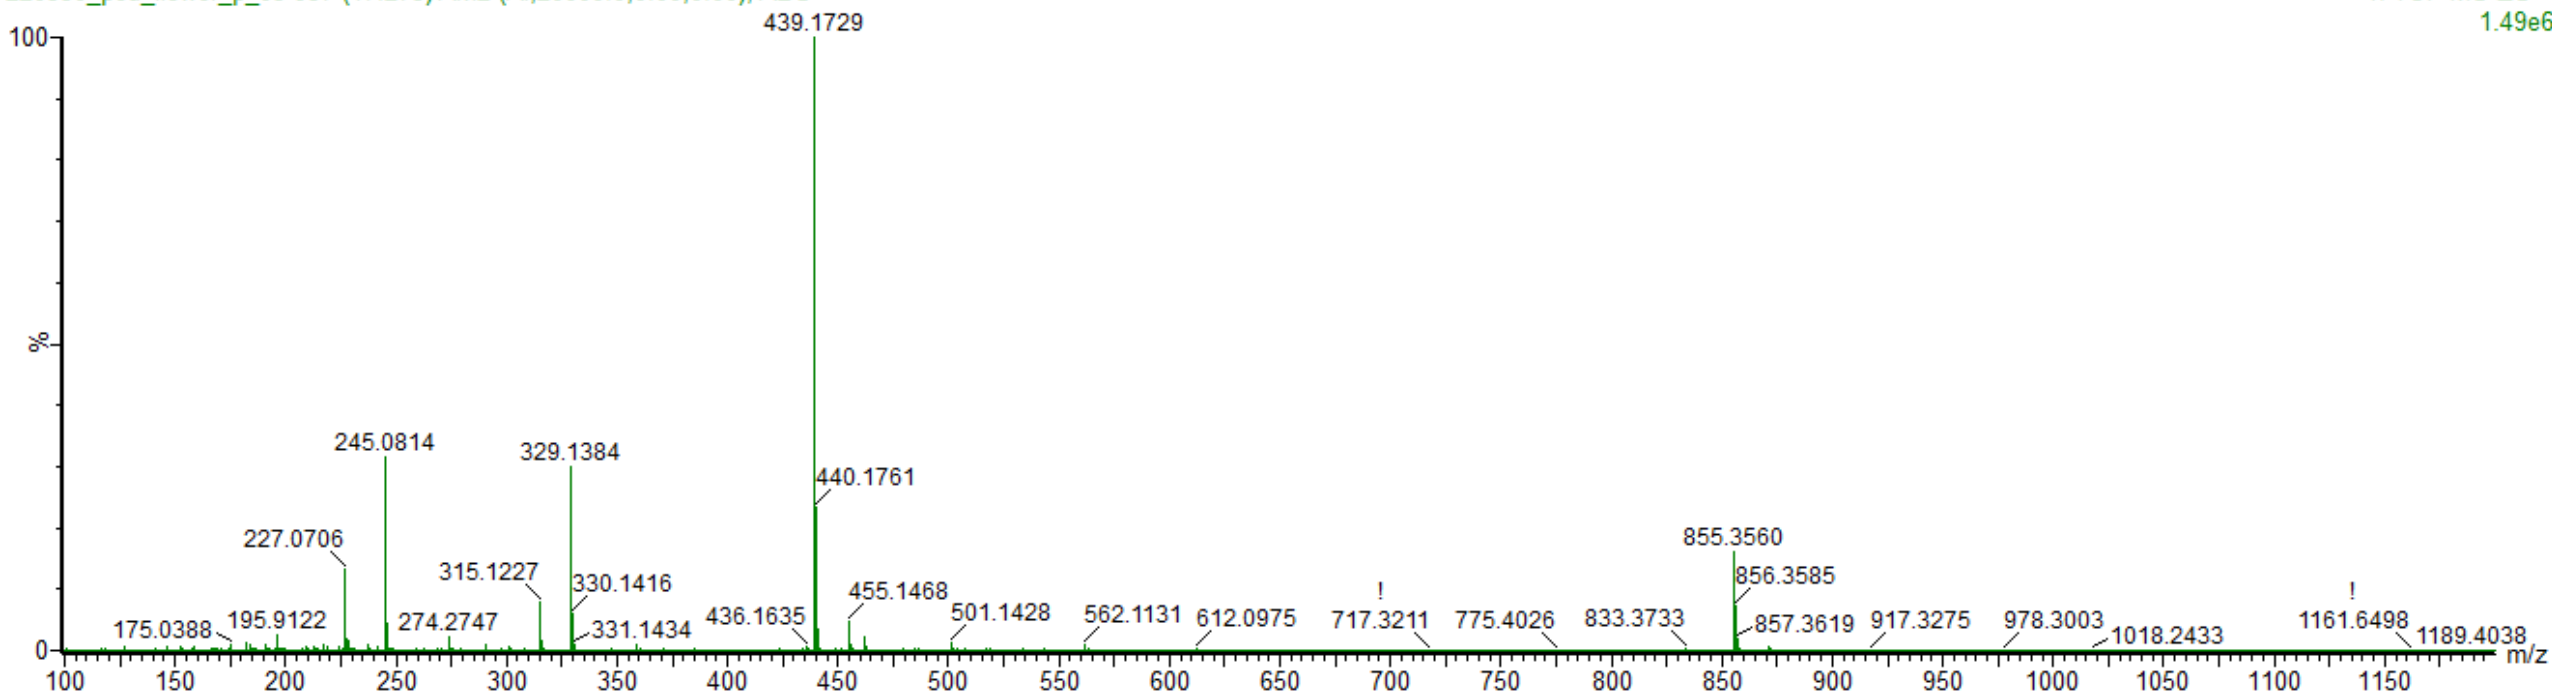

**Figure S24.** ESI-QToF-MS spectrum of 3'-O-(2-methyl butyryl)-4'-O-isobutyrylhellactone (peak23 ).

220530\_peu\_flower\_p\_03 952 (17.542) AM2 (Ar,20000.0,0.00,0.00); ABS

1: TOF MS ES+  
2.37e5

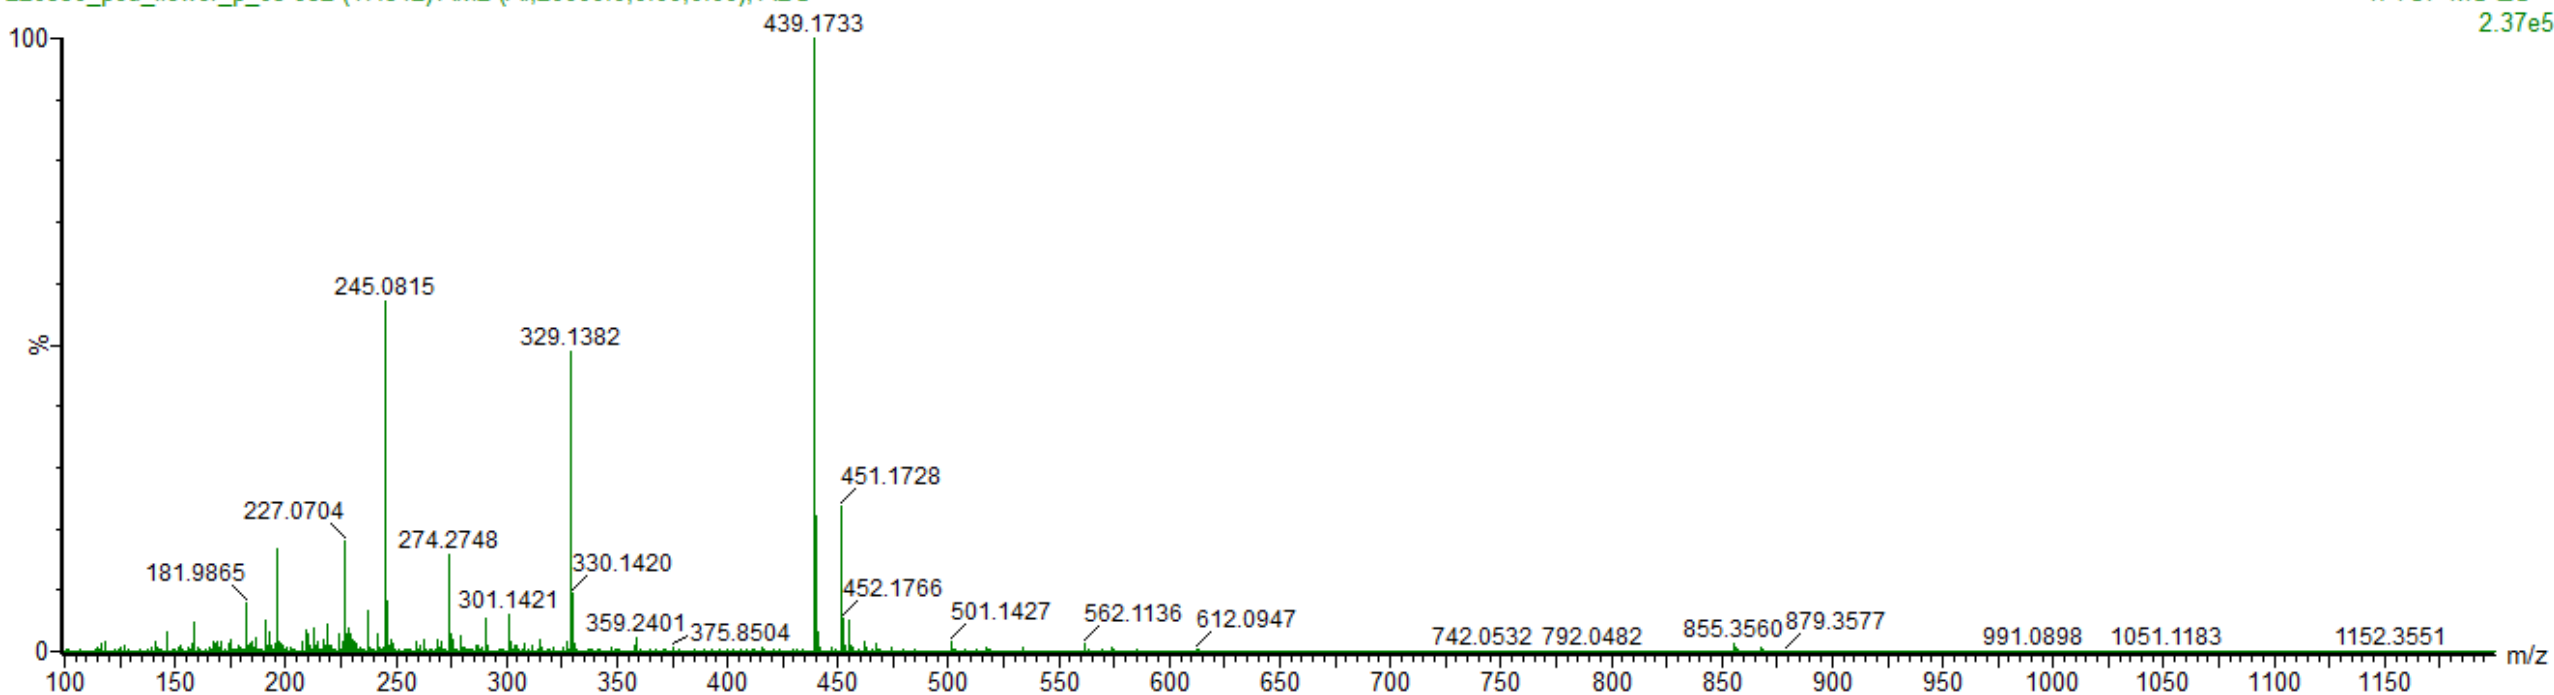

**Figure S25.** ESI-QToF-MS spectrum of 3'-O-isovaleryl-4'-O-isobutyrylkhellactone (peak 24).

220530\_peu\_flower\_p\_03 997 (18.371) AM2 (Ar,20000.0,0.00,0.00); ABS

1: TOF MS ES+  
1.74e6

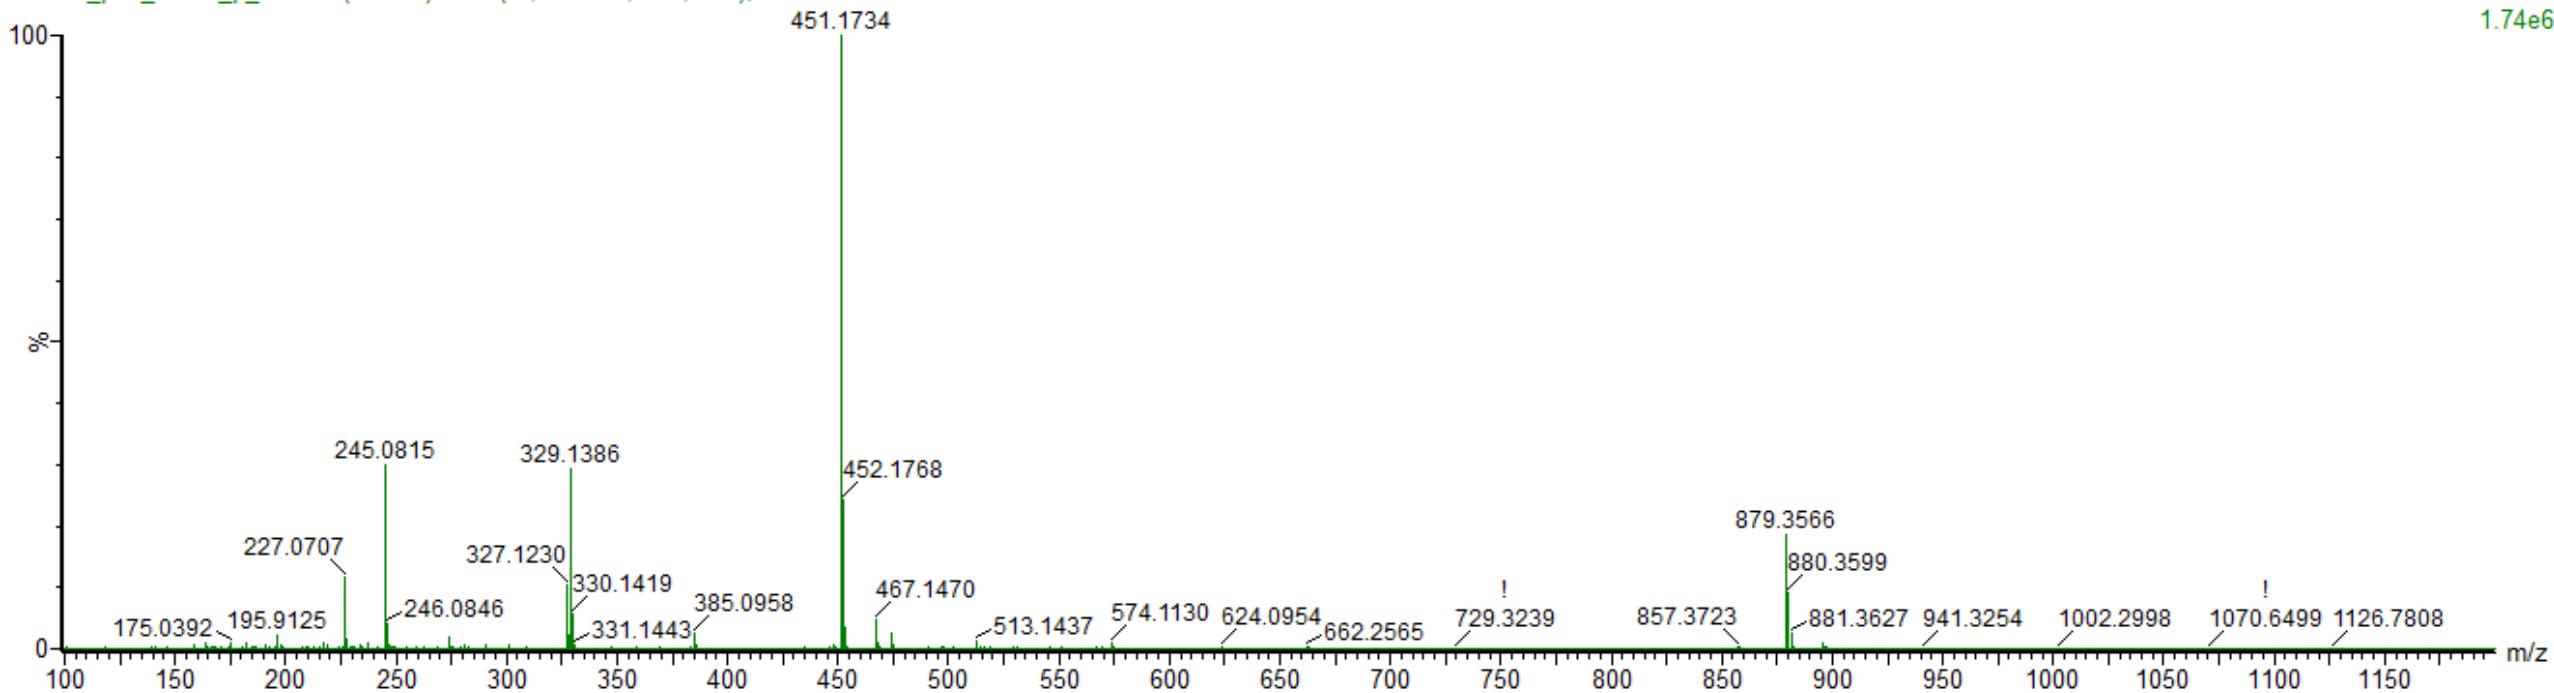

**Figure S26.** ESI-QToF-MS spectrum of 3'-O-(2-methyl butyryl)-4'-O-angeloylkhellactone [3'-O-(2-methyl butyryl)-4'-O-senecioyl khellactone, 3'-O-isovaleryl-4'-O-angeloylkhellactone (paeruptorin C), or 3'-O-isovaleryl-4'-O-senecioylkhellactone] (peak 25).

220530\_peu\_flower\_p\_03 1020 (18.799) AM2 (Ar,20000.0,0.00,0.00); ABS

1: TOF MS ES+  
1.48e6

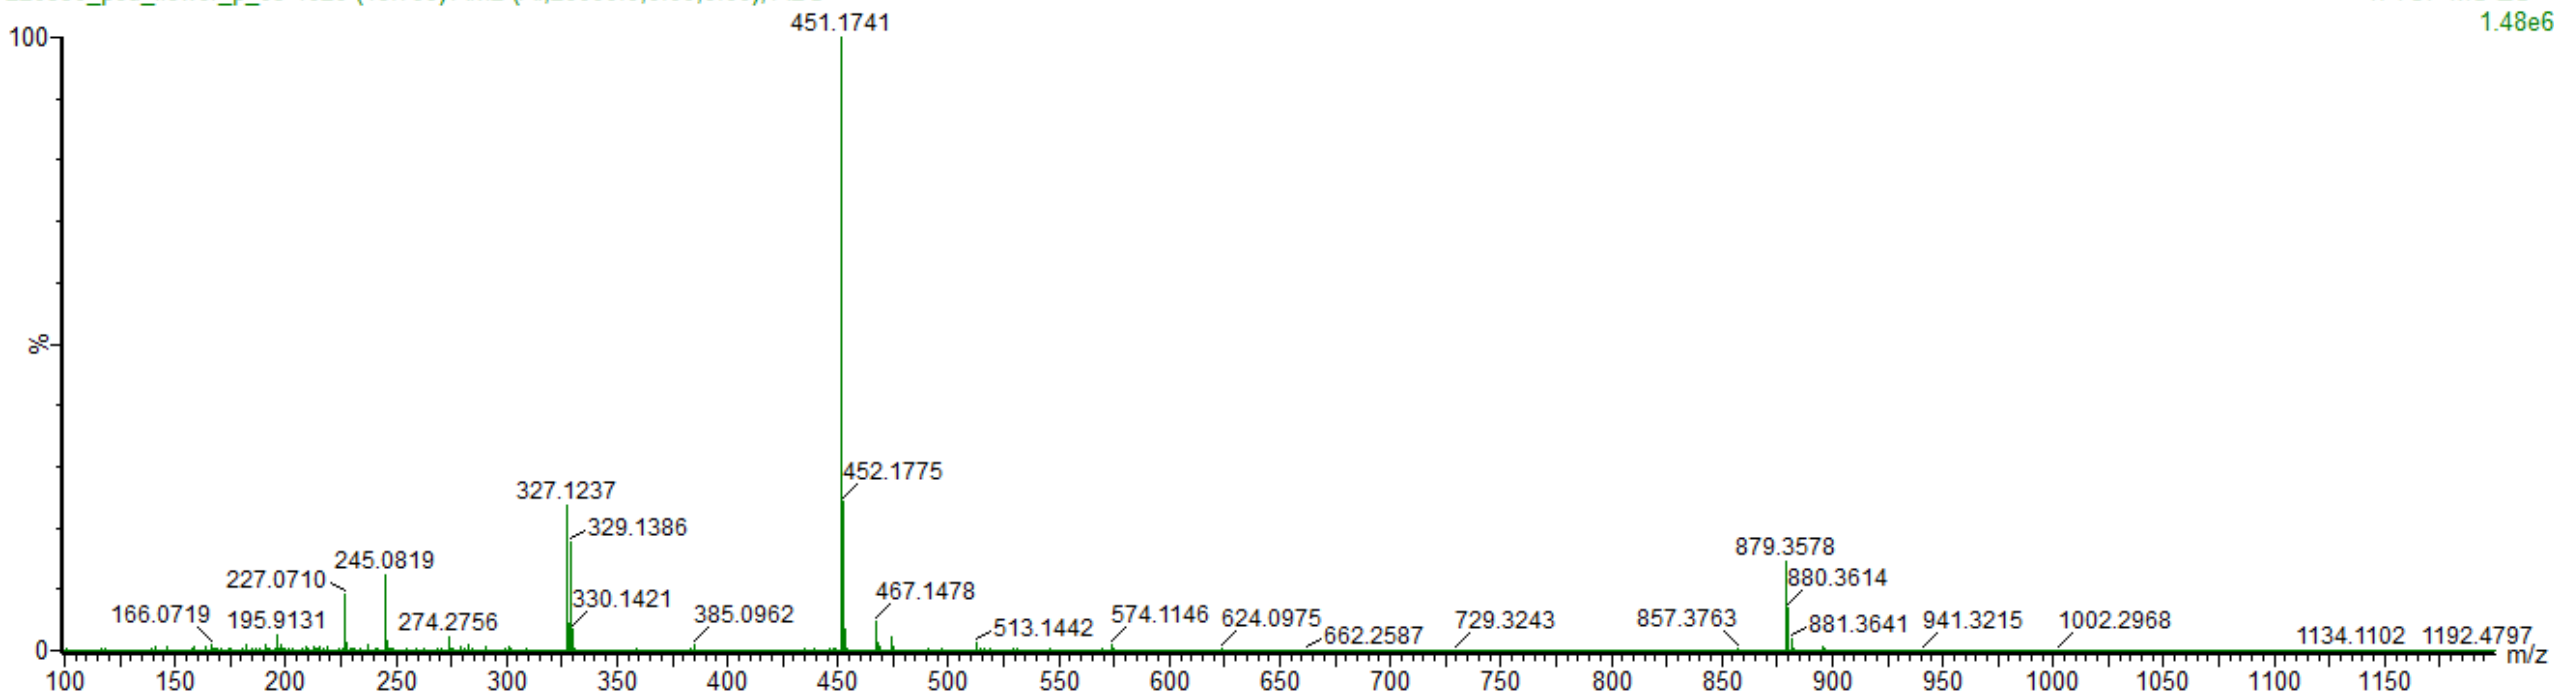

**Figure S26.** ESI-QToF-MS spectrum of 3'-O-angeloyl-4'-O-(2-methyl butyryl)khellactone [3'-O-angeloyl-4'-O-isovaleryl khellactone, 3'-O-senecieryl-4'-O-(2-methyl butyryl)khellactone, or 3'-O-senecieryl-4'-O-isovaleryl khellactone] (peak 26).

220530\_peu\_flower\_p\_03 1135 (20.919) AM2 (Ar,20000.0,0.00,0.00); ABS

1: TOF MS ES+  
2.61e6

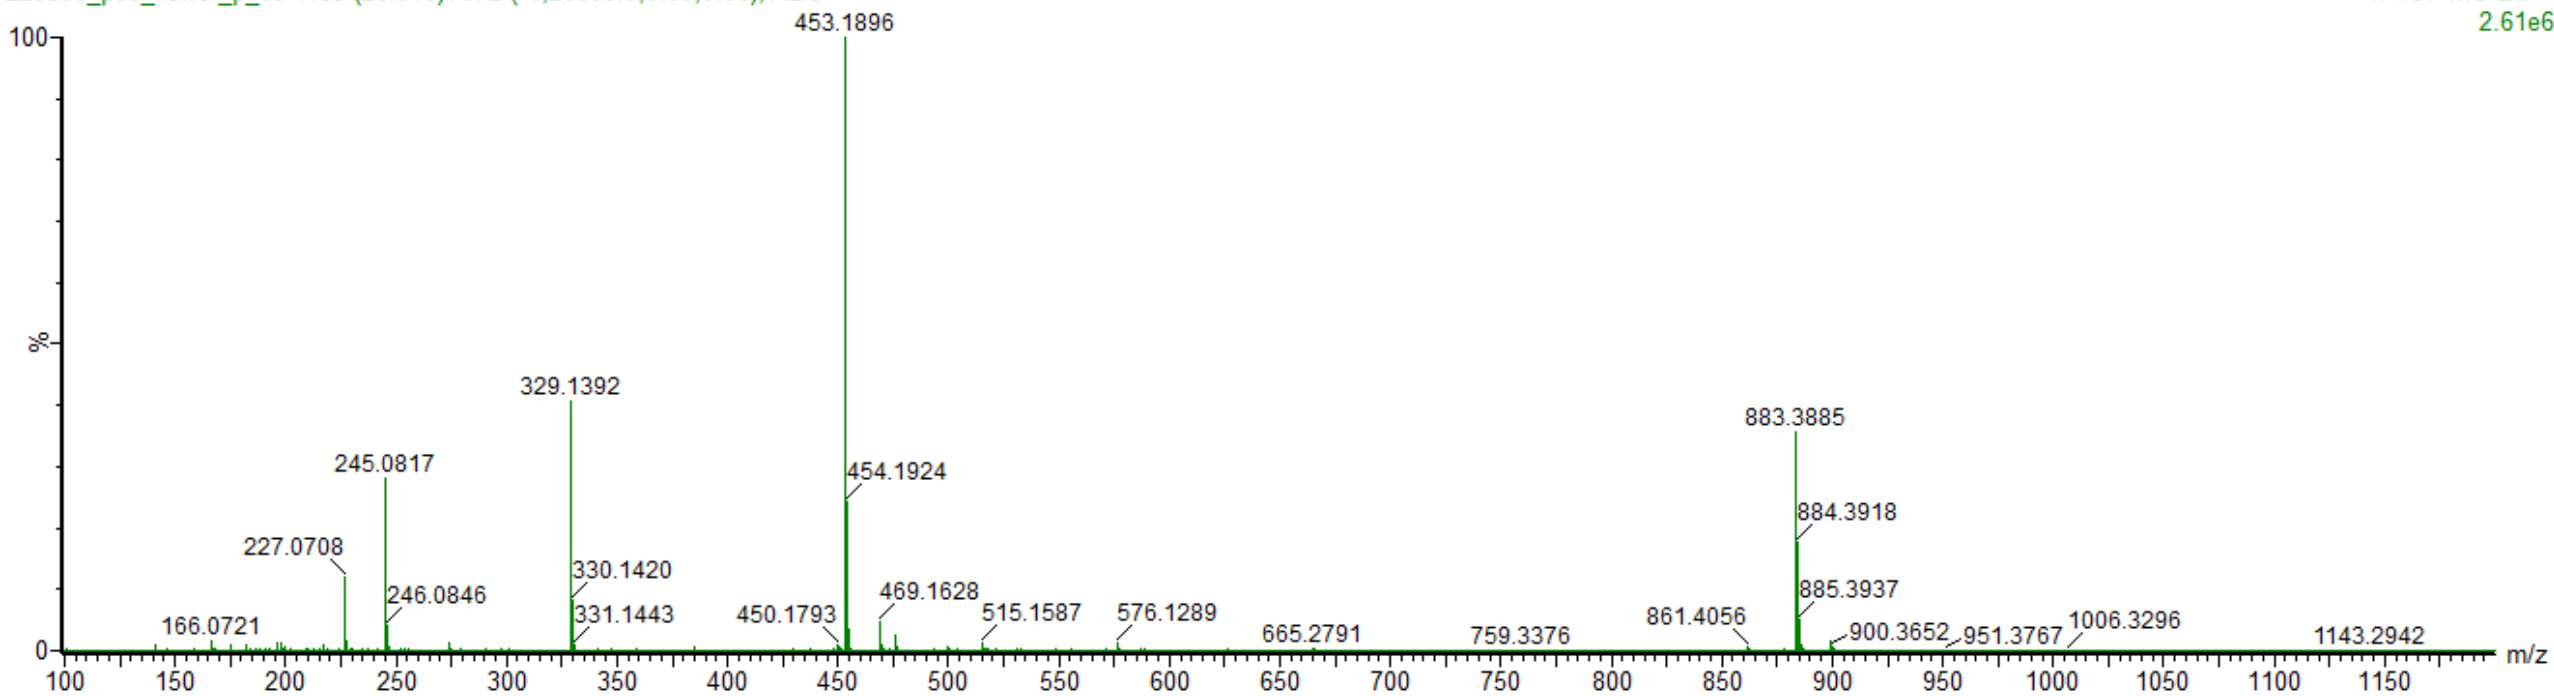

**Figure S28.** ESI-QToF-MS spectrum of 3'-O-(2-methyl butyryl)-4'-O-(2-methyl butyryl)khellactone (or 3'-O-(2-methyl butyryl)-4'-O-isovalerylkhellactone) (peak 27).

220530\_peu\_flower\_p\_03 1154 (21.268) AM2 (Ar,20000.0,0.00,0.00); ABS

1: TOF MS ES+  
2.80e6

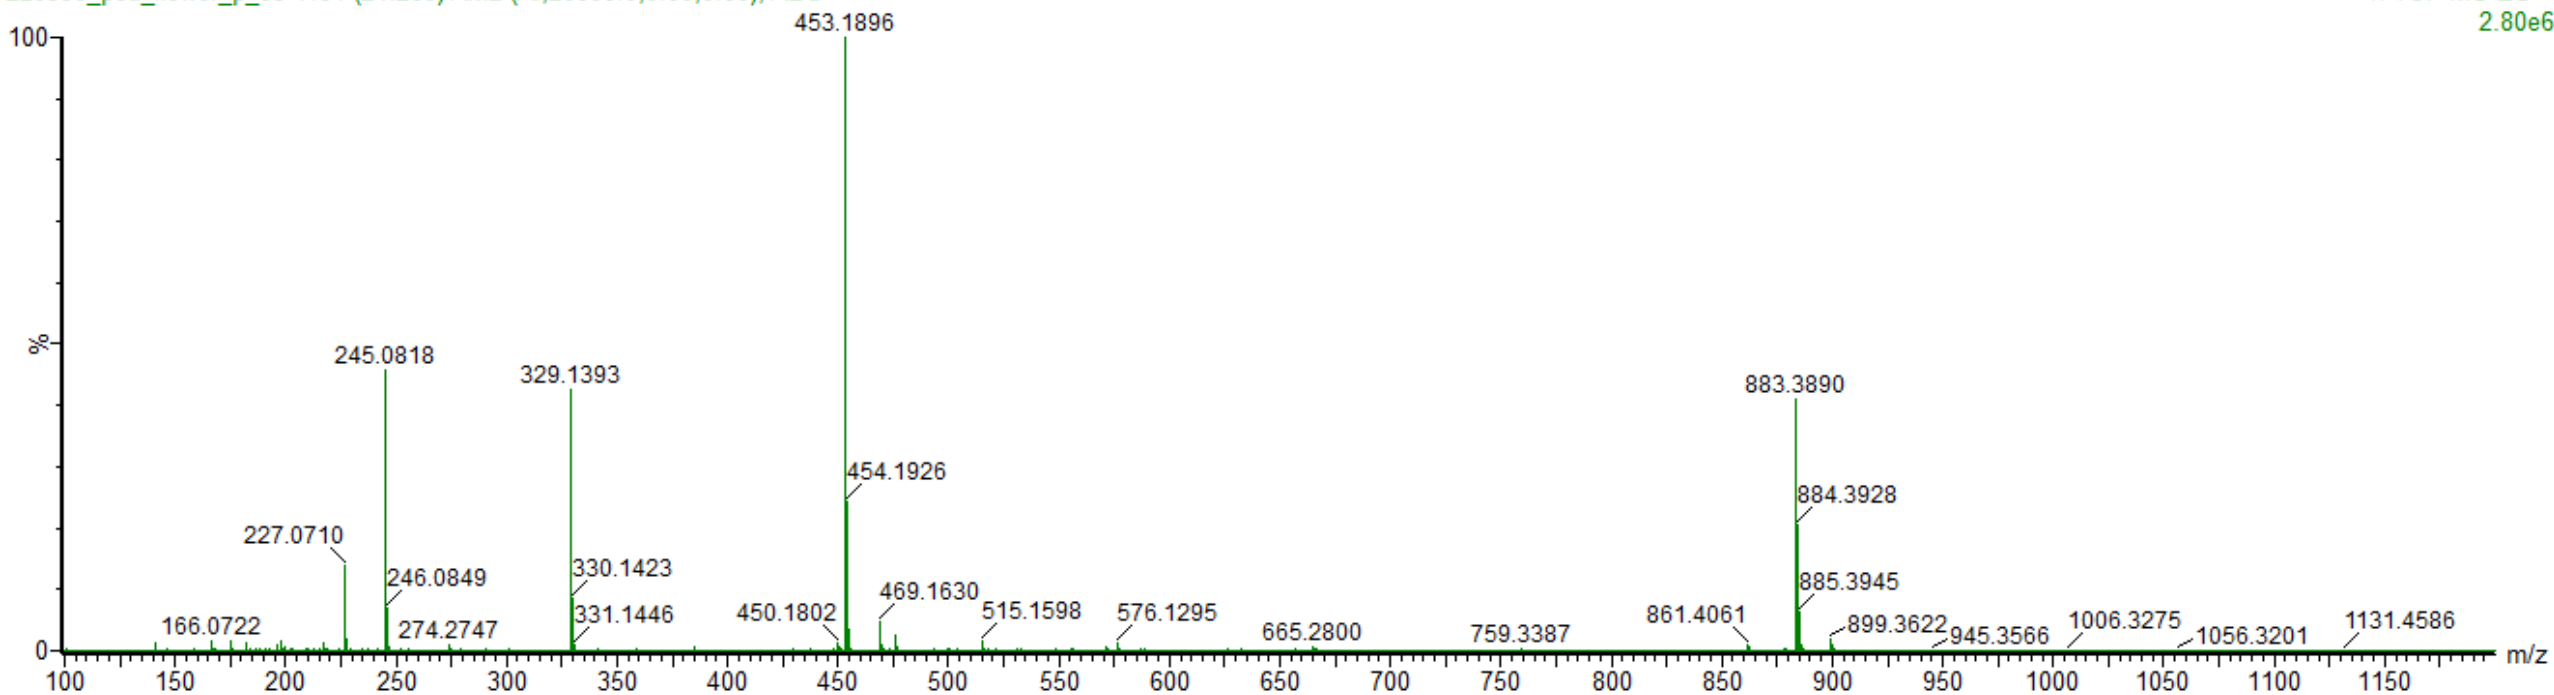

**Figure S29.** ESI-QToF-MS spectrum of 3'-O-isovaleryl-4'-O-(2-methyl butyryl)khellactone (or 3'-O-isovaleryl-4'-O-isovalerylkhellactone) (peak 28).



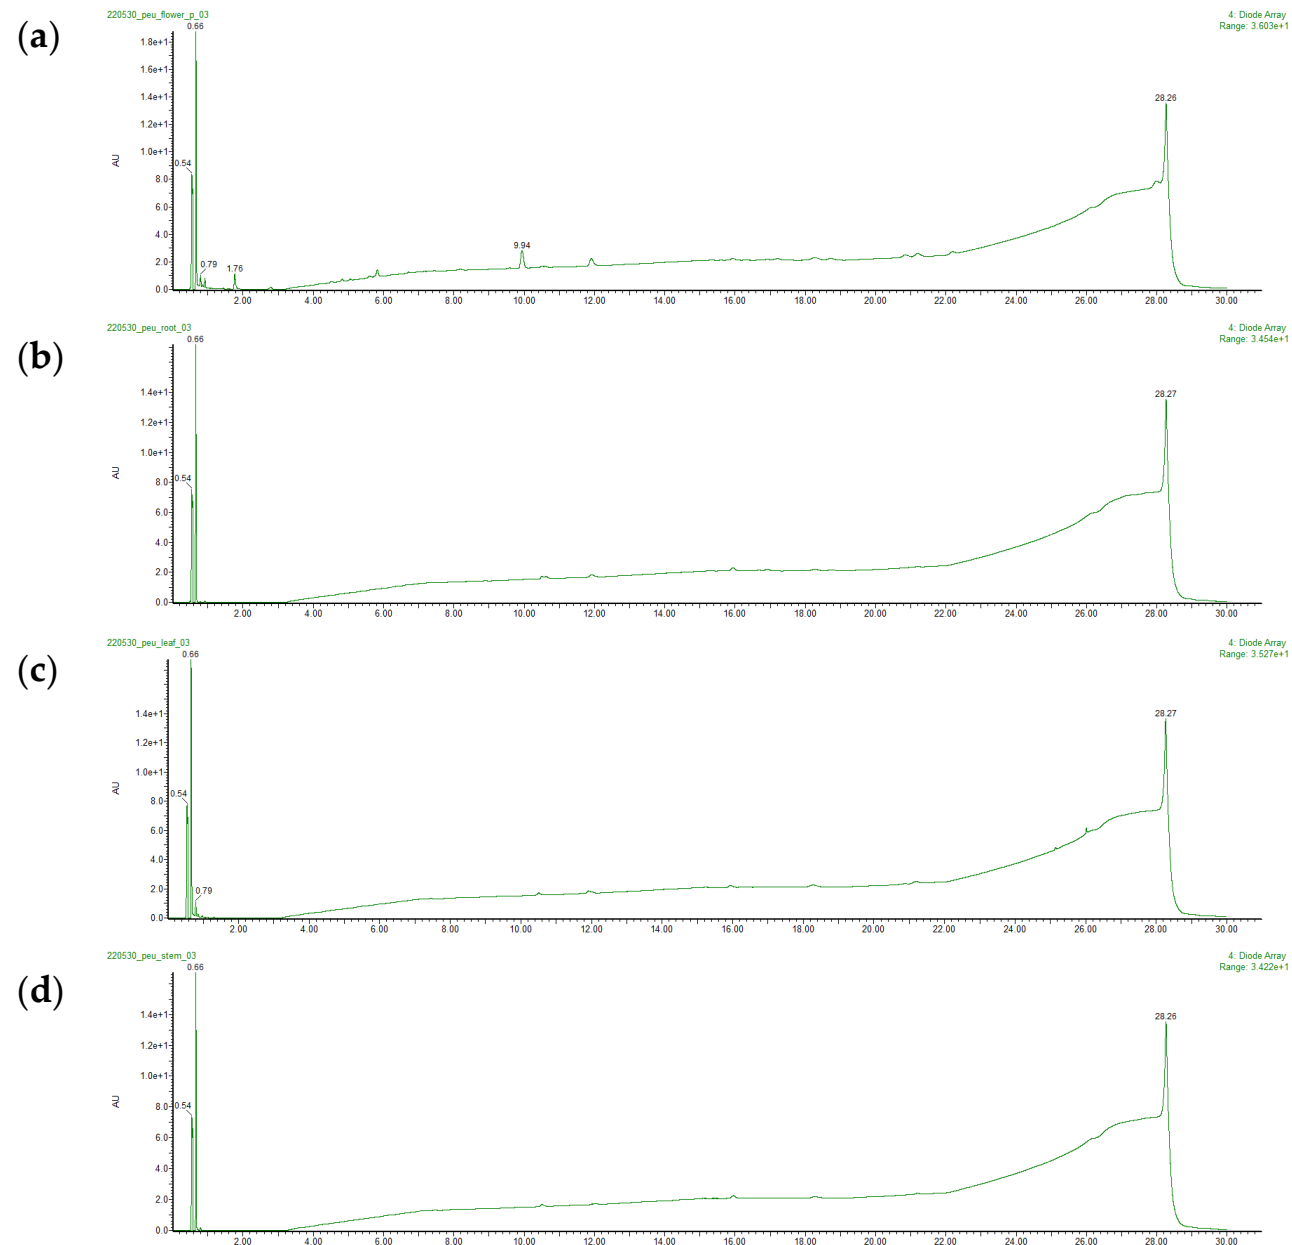

**Figure S30.** Total scan PDA chromatograms of (a) flowers (S3), (b) roots (S15), (c) leaves (S9), and (d) stems (S21) of *Peucedanum japonicum*

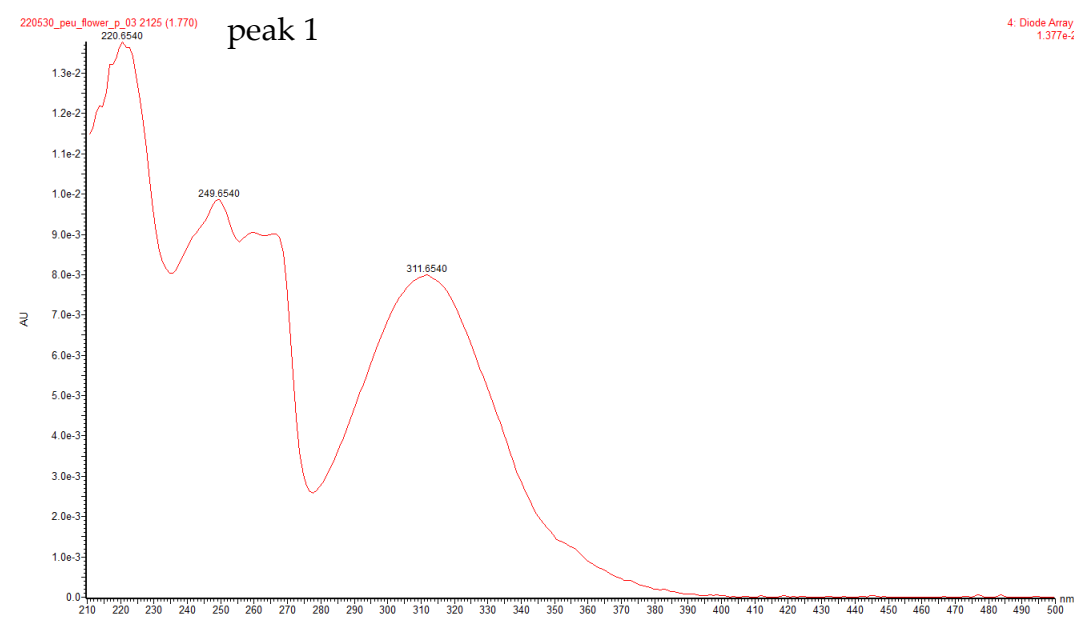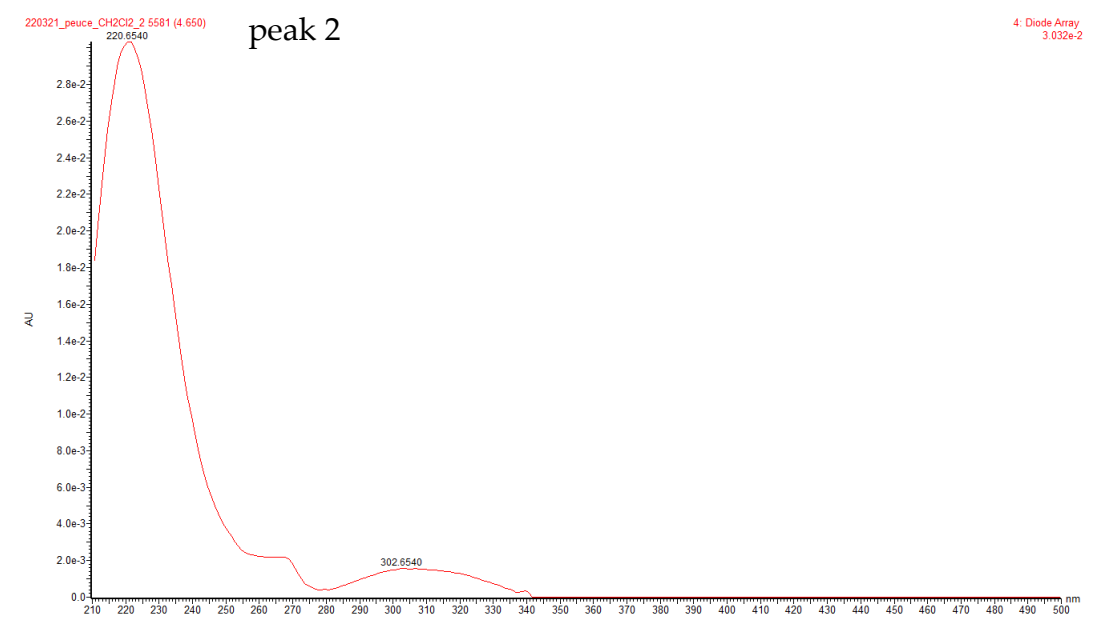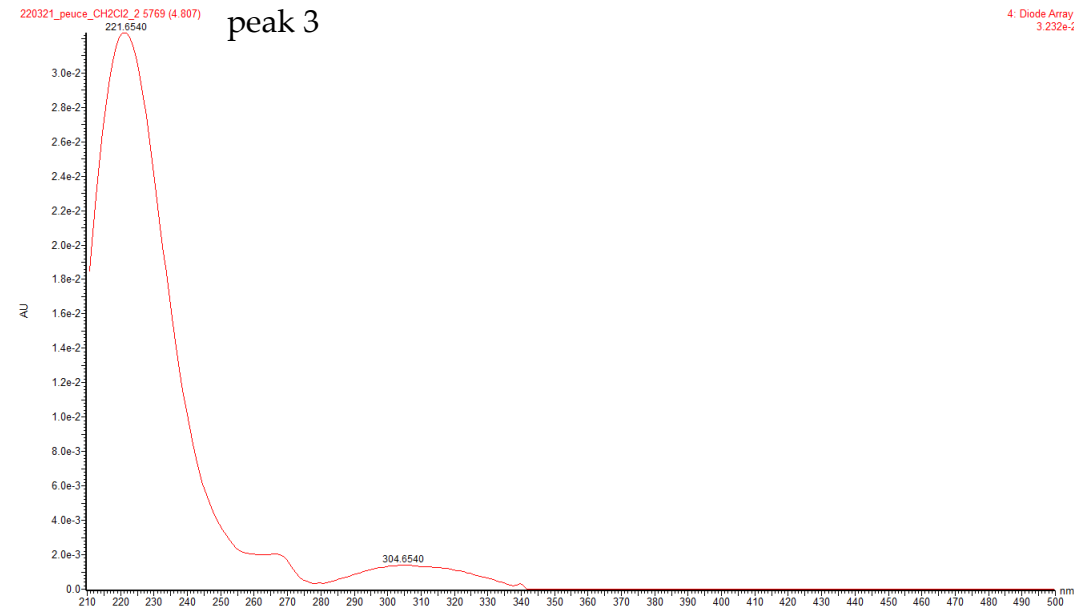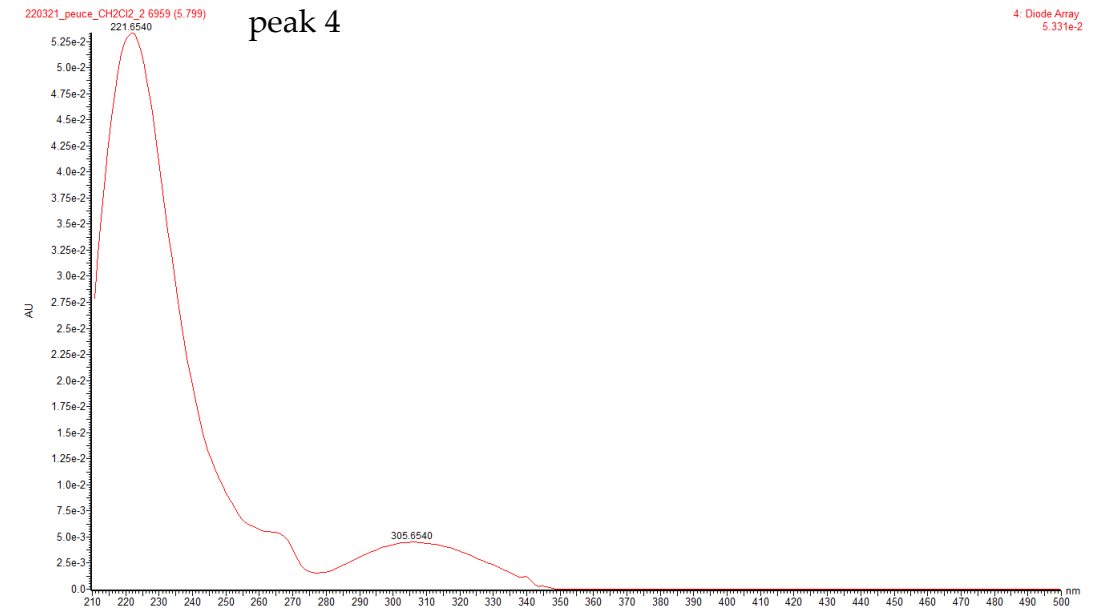

**Figure S31.** UV-Vis spectra of all the peaks present in PDA chromatograms of the methanol extract of four parts of *Peucedanum japonicum* between 200–500 nm.

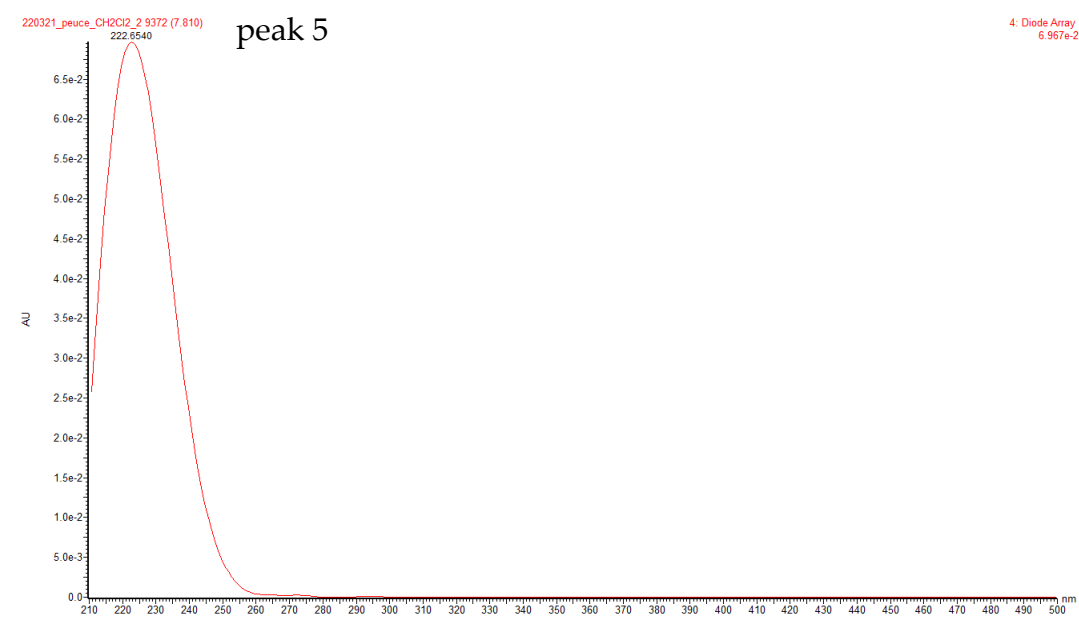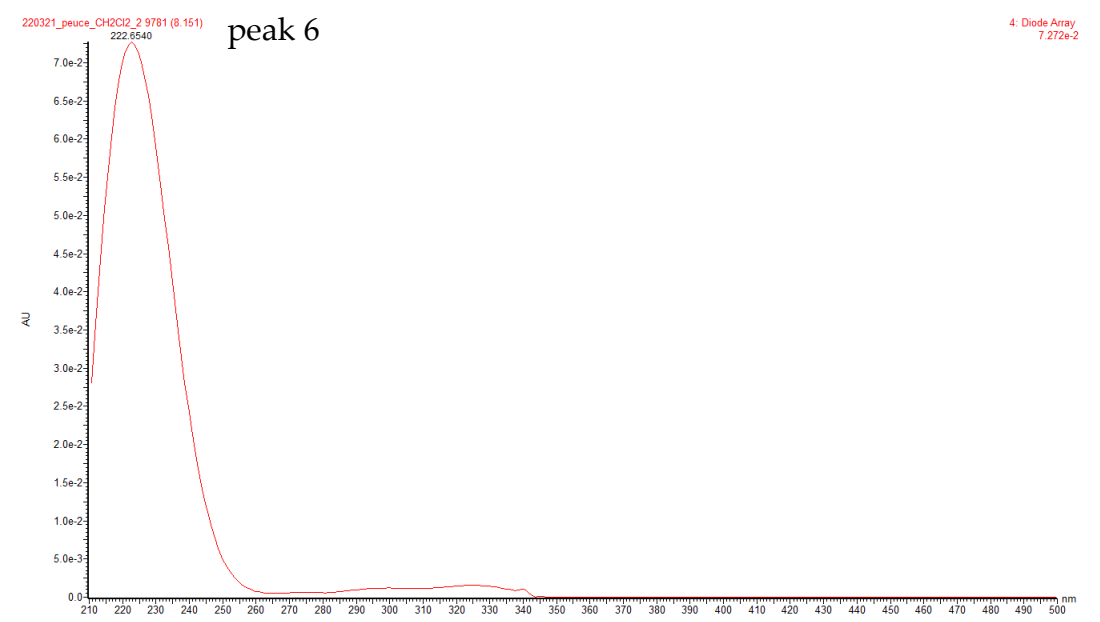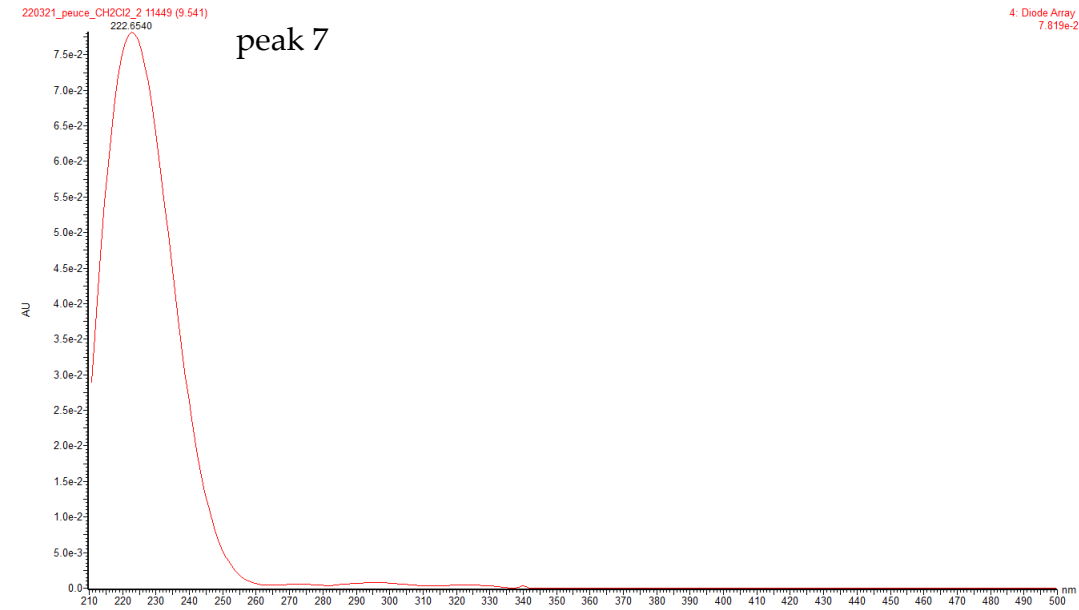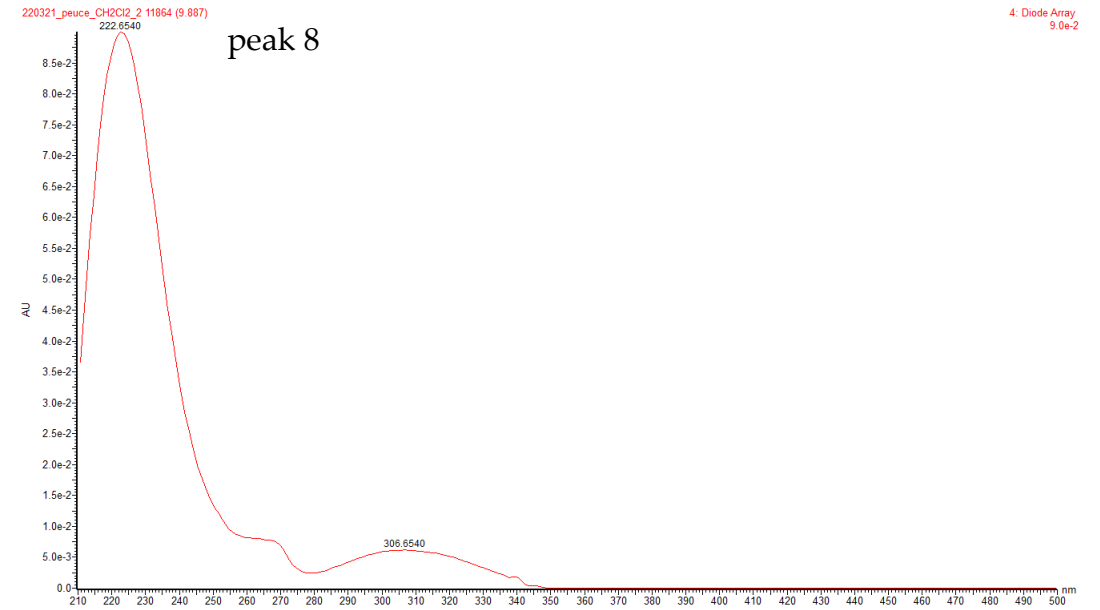

**Figure S31.** UV-Vis spectra of all the peaks present in PDA chromatograms of the methanol extract of four parts of *Peucedanum japonicum* between 200–500 nm. (*Cont*)

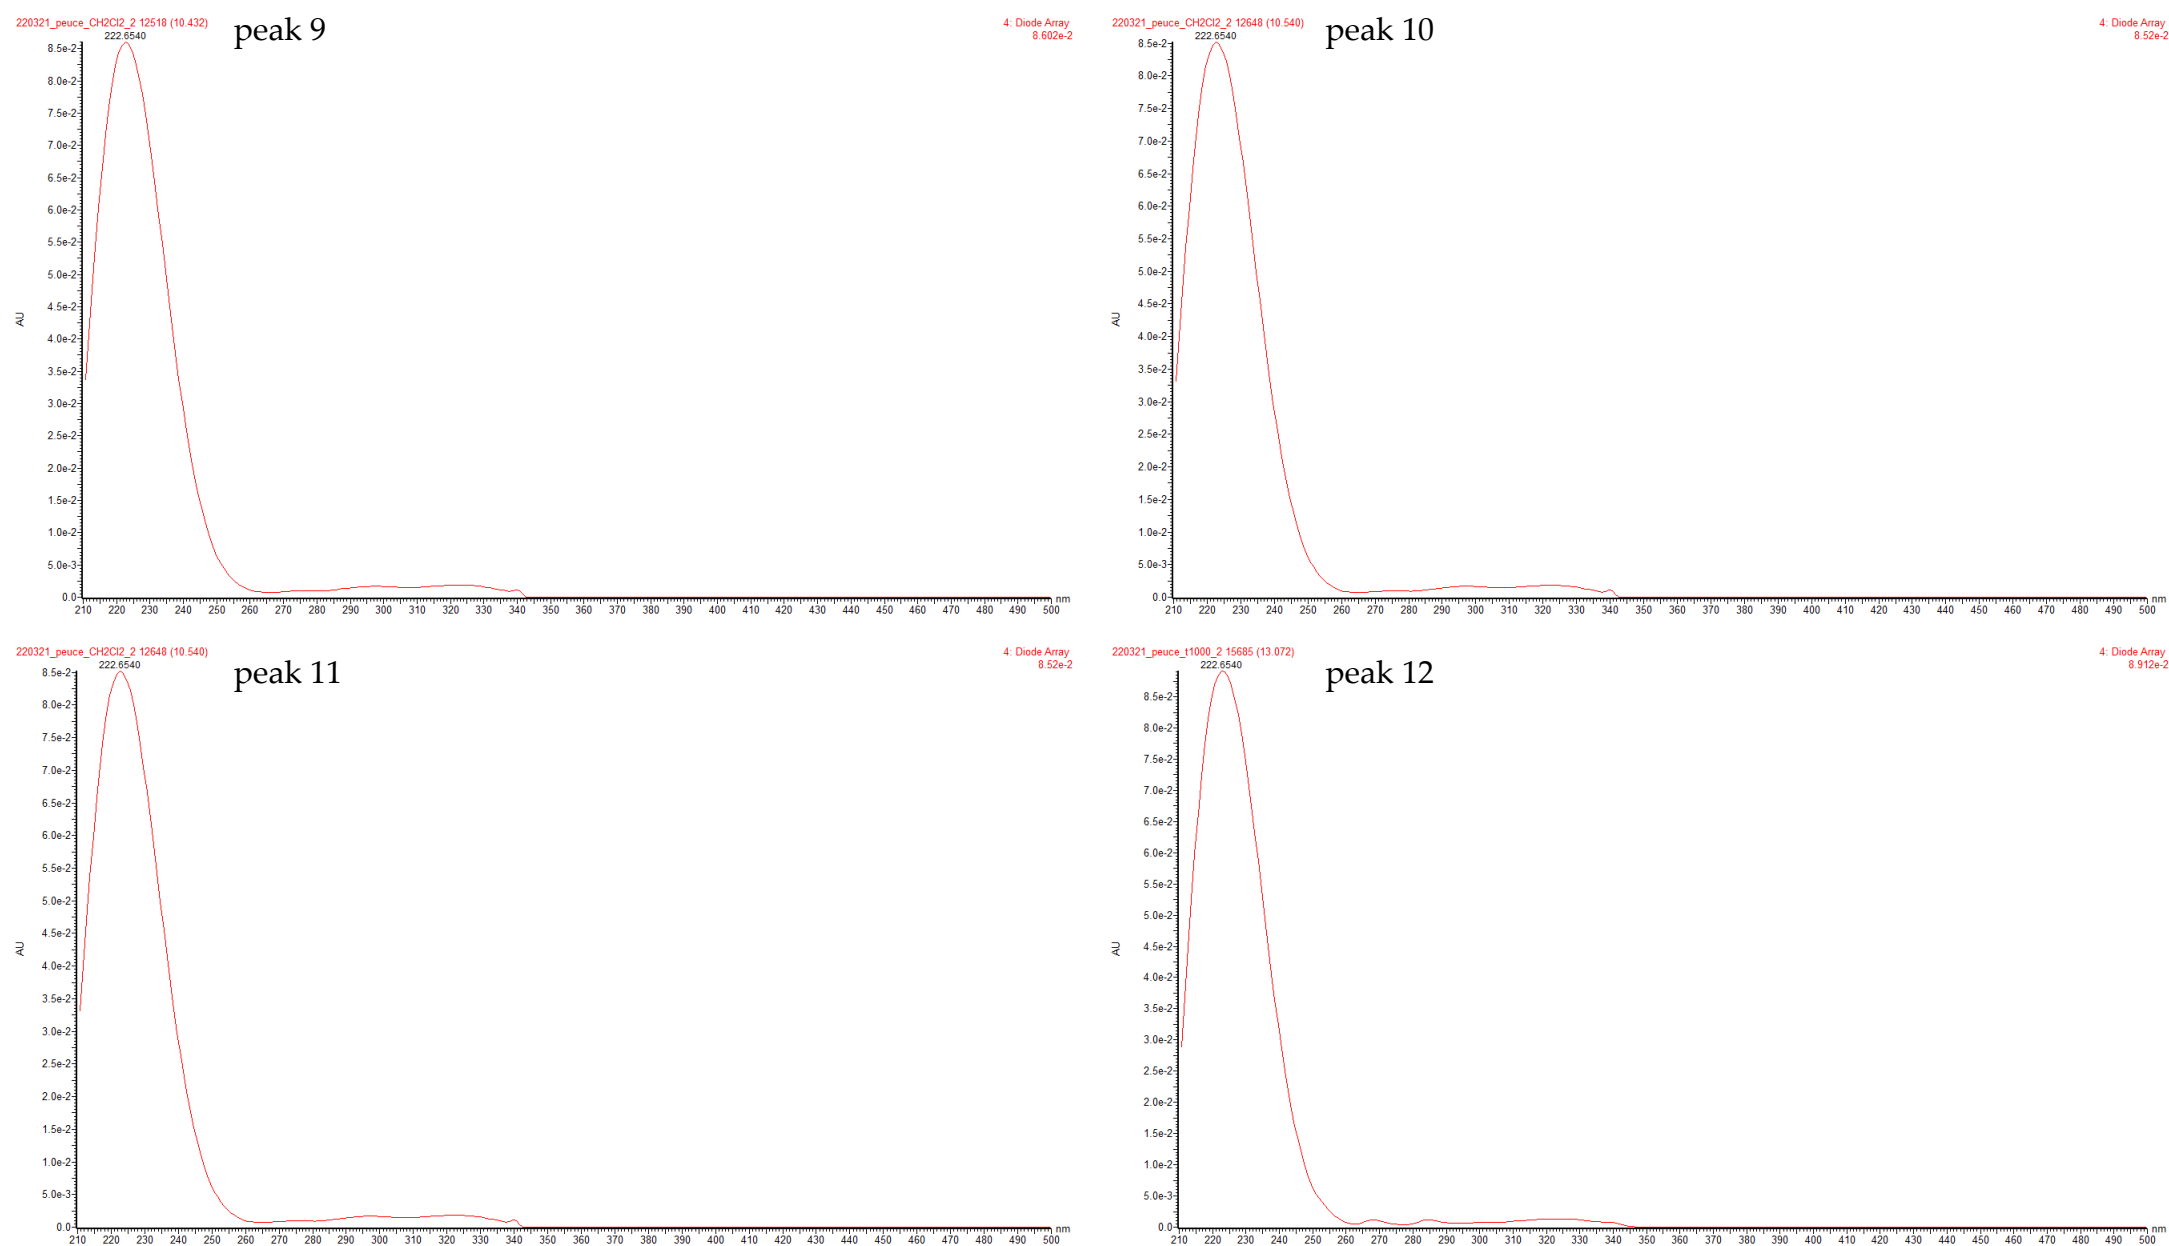

**Figure S31.** UV-Vis spectra of all the peaks present in PDA chromatograms of the methanol extract of four parts of *Peucedanum japonicum* between 200–500 nm. (*Cont*)

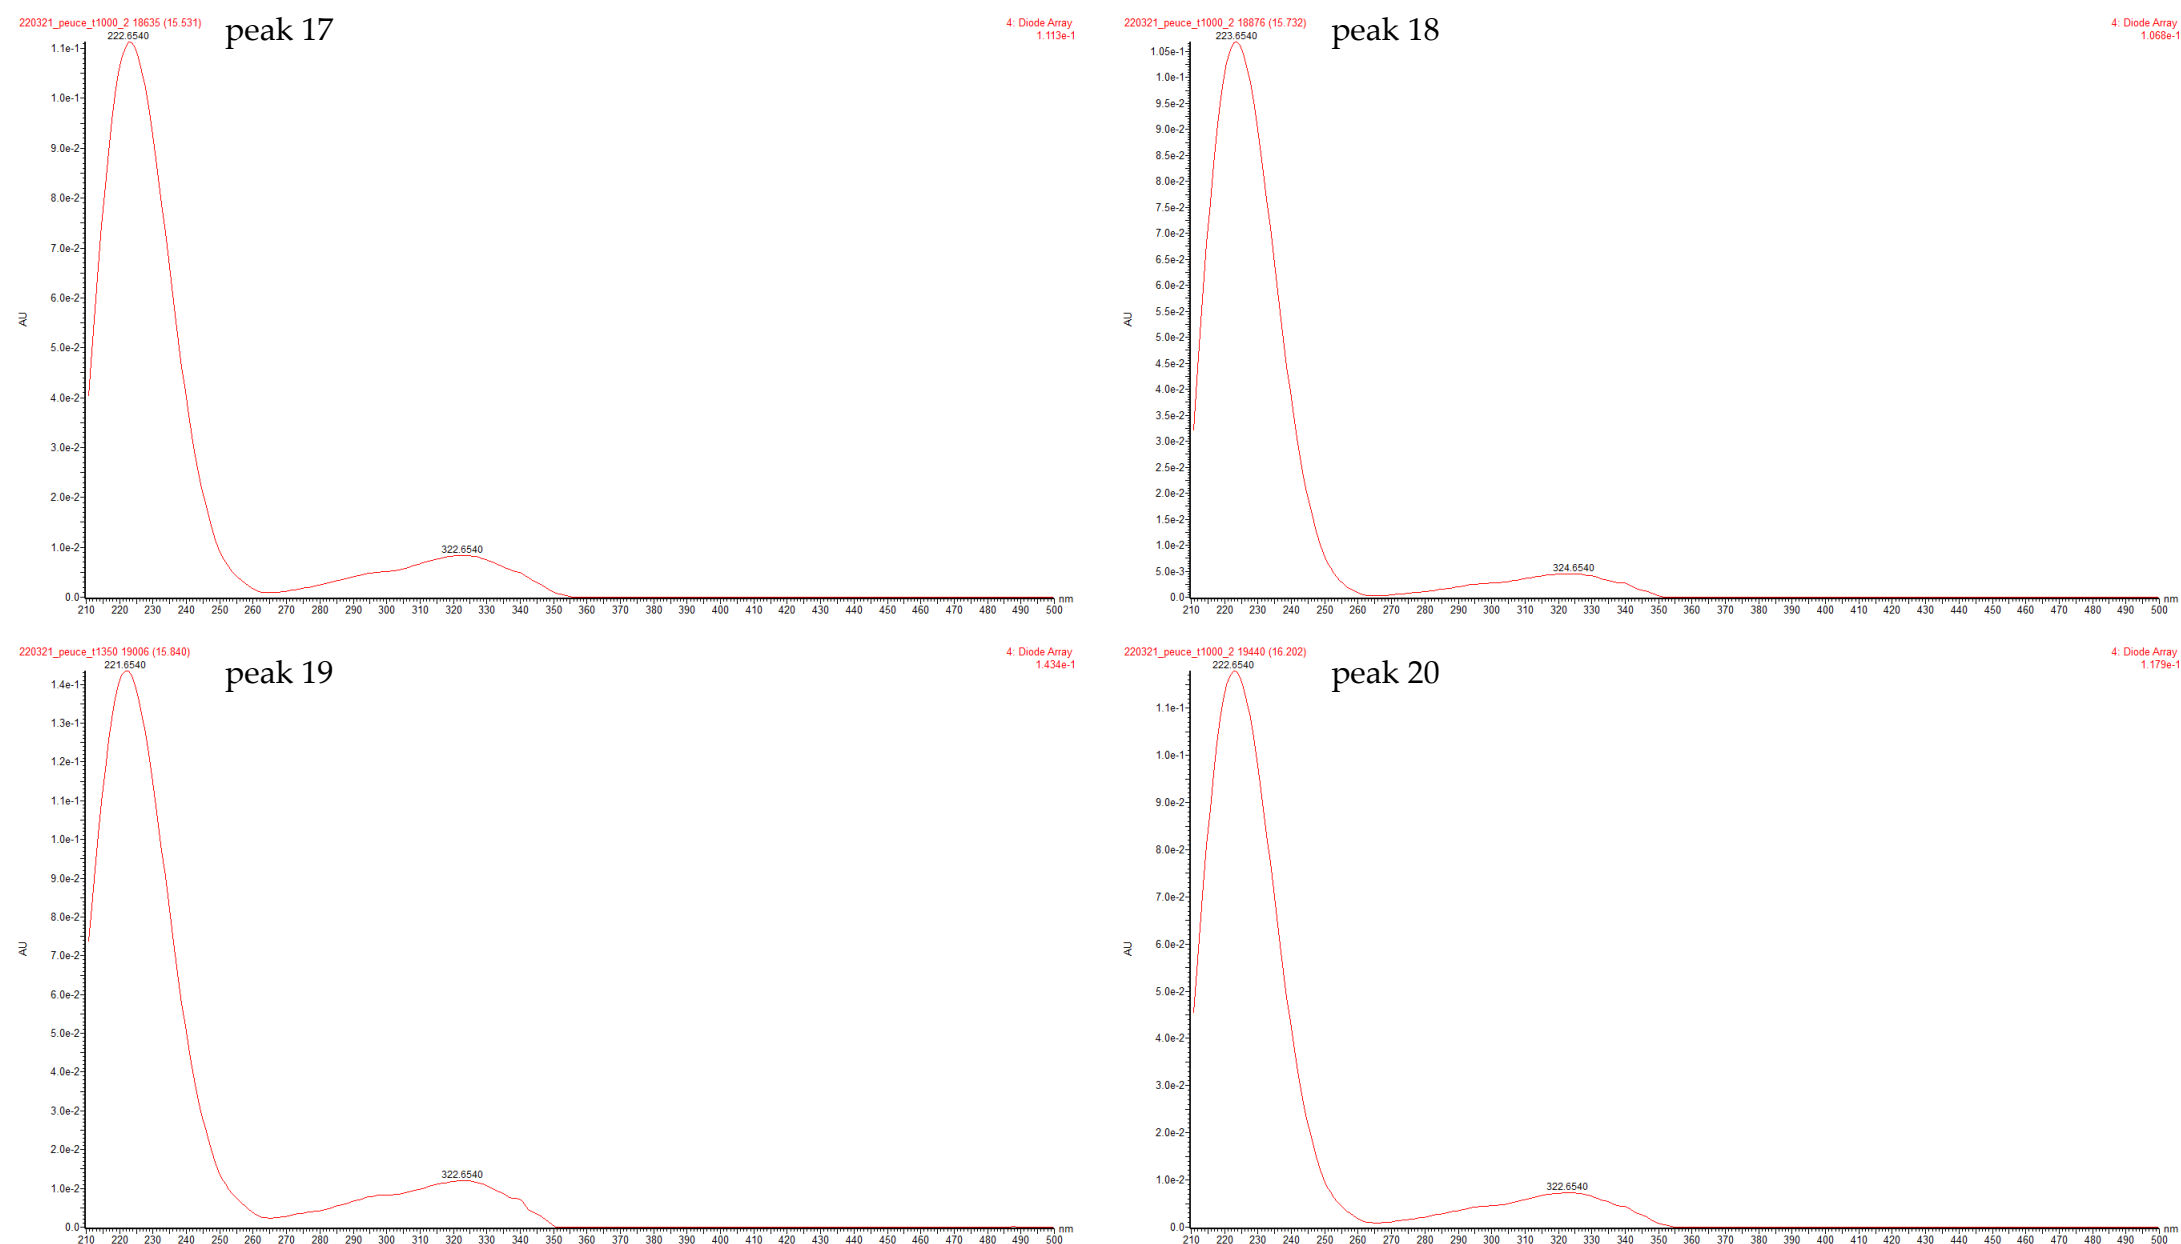

**Figure S31.** UV-Vis spectra of all the peaks present in PDA chromatograms of the methanol extract of four parts of *Peucedanum japonicum* between 200–500 nm. (*Cont*)

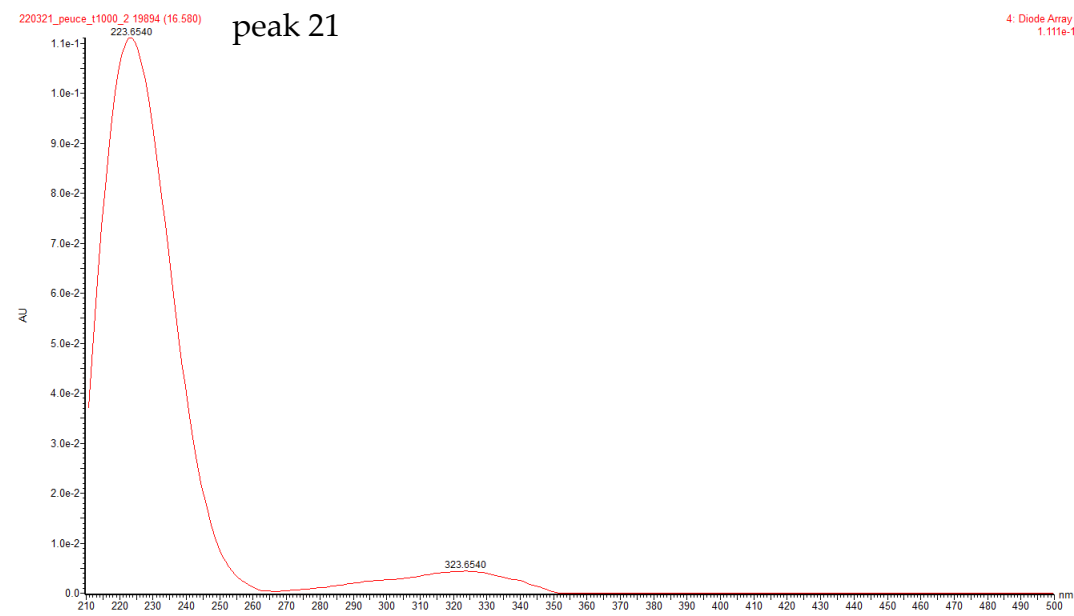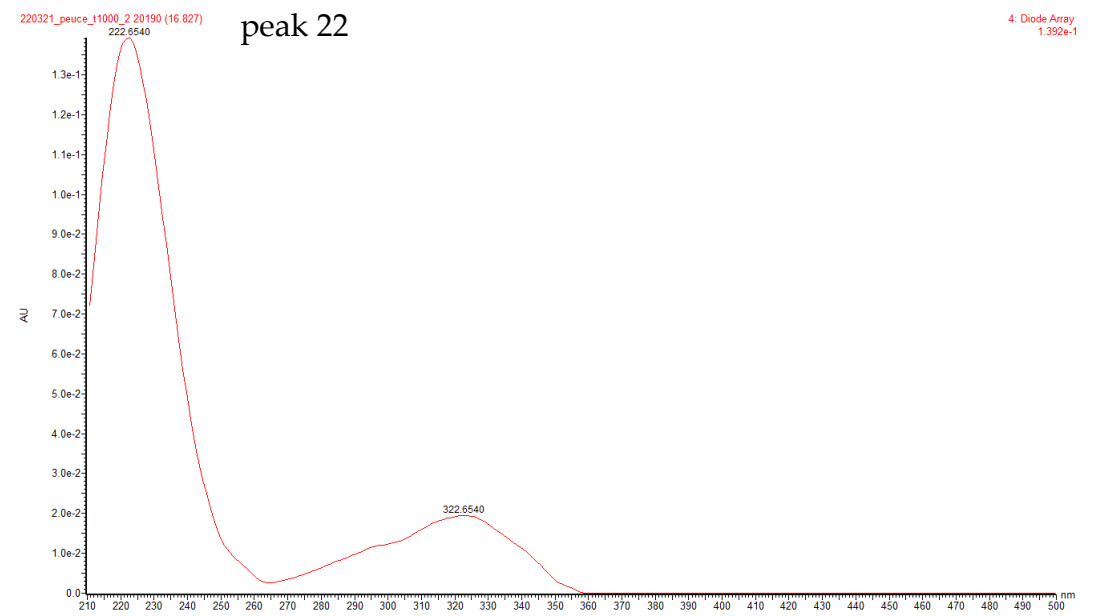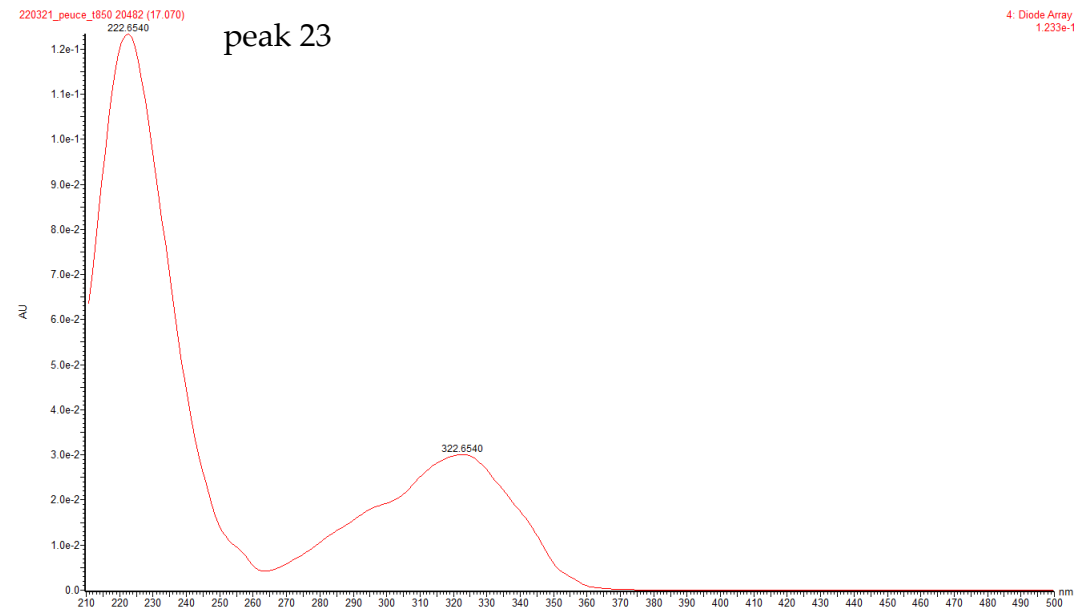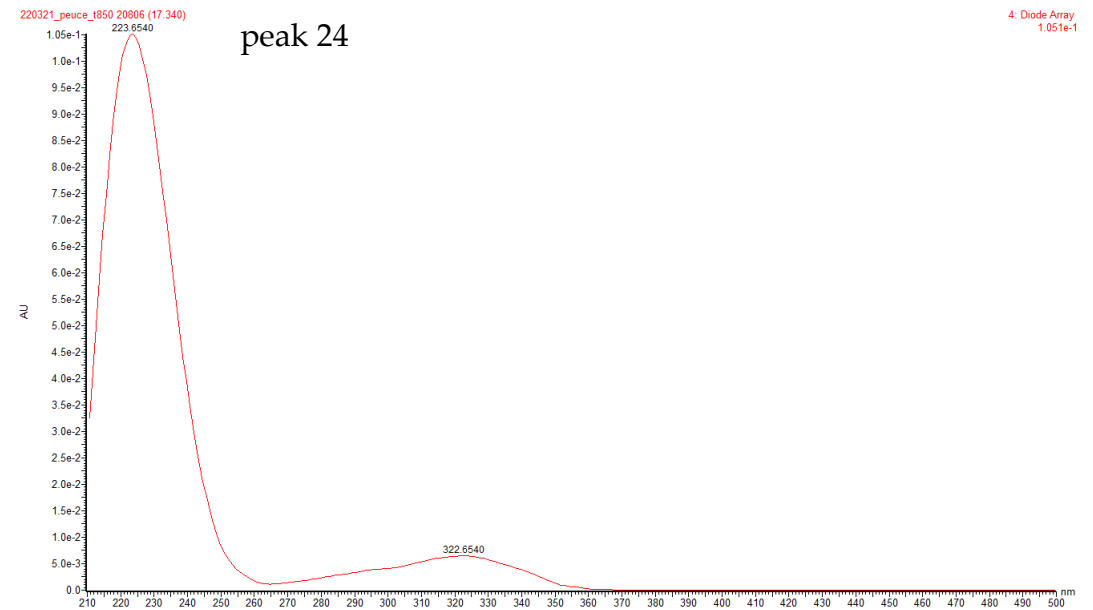

**Figure S31.** UV-Vis spectra of all the peaks present in PDA chromatograms of the methanol extract of four parts of *Peucedanum japonicum* between 200–500 nm. (Cont)

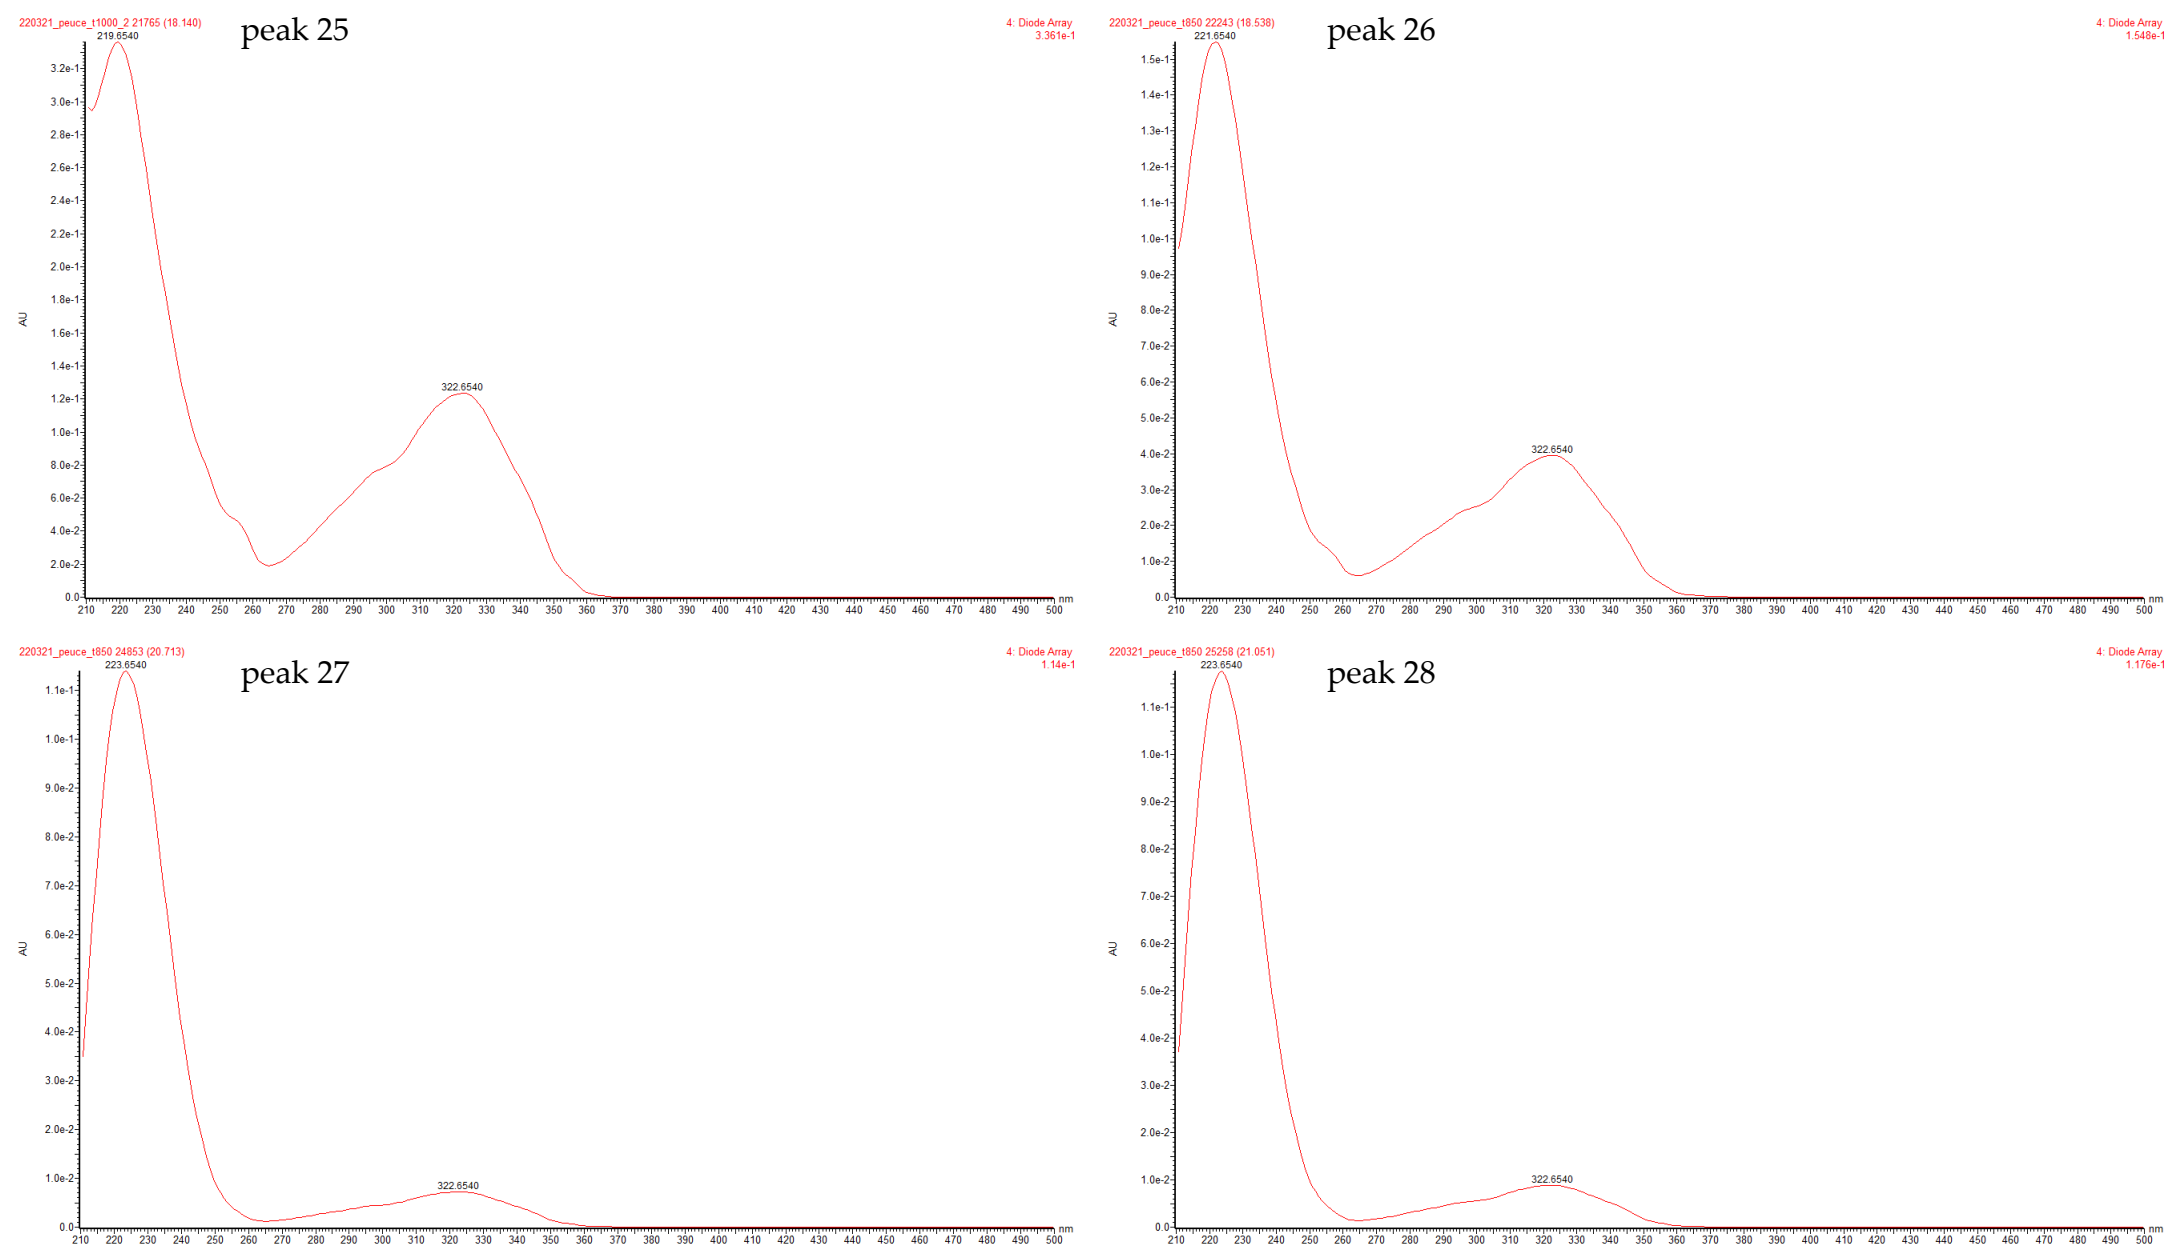

**Figure S31.** UV-Vis spectra of all the peaks present in PDA chromatograms of the methanol extract of four parts of *Peucedanum japonicum* between 200–500 nm. (*Cont*)

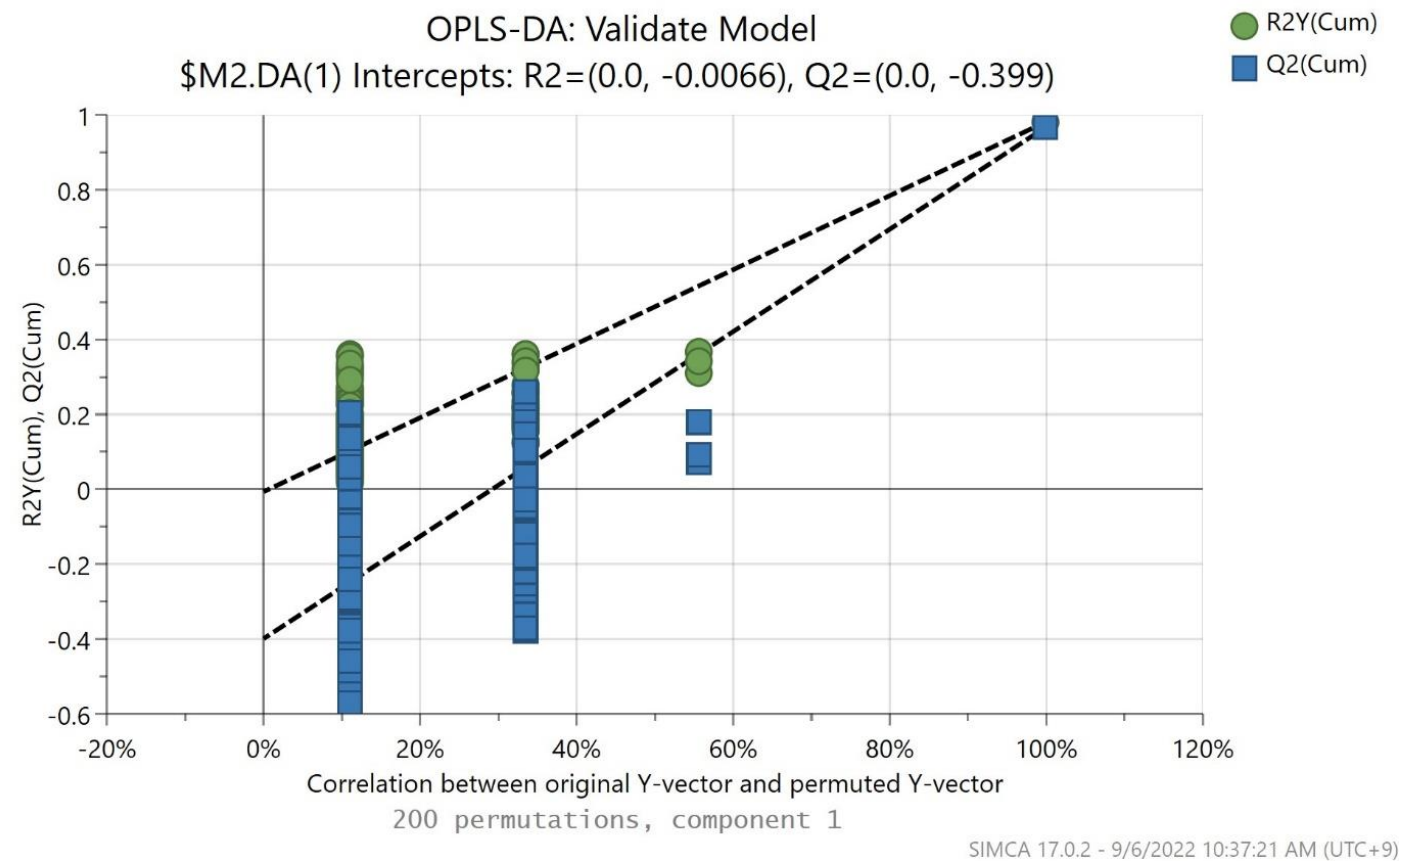

**Figure S32.** Permutation plot for validation of OPLS-DA obtained from 200 permutation test.
